# Supplementary material for: A psychobiological resilience factor for mental health across the lifespan
Source: Research Square preprint supplement (doi:10.21203/rs.3.rs-7861905/v1), 2025-10-29
Supplement: Supplementary file 1 [file 3e081dfe256d99cae41b56fe.docx]

**A psychobiological resilience factor for mental health across the lifespan**

**Appendix**

**Contents**

[Appendix A. Supplementary Methods 1](#_Toc199415839)

[Appendix B. Supplementary Figures 8](#_Toc199415840)

[Appendix C. Supplementary Tables 12](#_Toc199415841)

[Appendix D. Refferences 92](#_Toc199415842)

## **Appendix A. Supplementary Methods**

**1. Mental health measures in IMAGEN**

Psychiatric disorders of the IMAGEN participants were assessed using screening questions from the Development and Well-Being Assessment (DAWBA). The Development and Well-Being Assessment (DAWBA) is a computer-based package of questionnaires, interviews, and rating techniques designed to generate DSM-IV psychiatric diagnoses1. During each visit, participants complete the DAWBA, which generates a diagnosis of possible mental disorders according to DSM-V criteria. In our research, we focus on the risk of internalized diseases within individuals, including emotional disorders such as major depression, generalized anxiety, and post-traumatic stress disorder (PTSD), as well as social disorders like attachment disorder and selective mutism.

**2. Resilience measures**

The Brief Resilience Scale (BRS) was utilized to assess the resilience of UK Biobank (UKB) participants at second online follow-up. It comprises six self-rated items, which are as follows: 1. I tend to bounce back quickly after hard times; 2. I have a hard time making it through stressful events (R); 3. It does not take me long to recover from a stressful event; 4. It is hard for me to snap back when something bad happens (R); 5. I usually come through difficult times with little trouble; 6. I tend to take a long time to get over setbacks in my life (R). This concise scale is specifically designed to measure resilience in its original meaning - as the ability to bounce back from stress2.

**3. Personality**

Due to the absence of a specific validated personality scale within the UKB, we utilized a hierarchy method to generate proxies for personality traits3,4. These proxies were composed of data from touchscreen questionnaires on psychological factors, mental health and social support completed by the participants at the baseline assessment. Questions that best match the facets of the Big Five Inventory were selected to generate proxies for warmth (agreeableness), diligence (conscientiousness), nervousness (neuroticism), sociability (extraversion), and curiosity (openness). The selected questions and corresponding field identification for the five personality traits are summarized in Table S5. Each question contributes one point to the personality trait scores, resulting in five proxies scored between 0 and 4 for sociability, diligence, and curiosity, and between 0 and 5 for warmth and nervousness.

**4. Biomarker data**

UKB routine blood parameters (category 100081: blood count; category 17518: biochemistry) were collected at baseline, following standardised protocols (<https://biobank.ndph.ox.ac.uk/showcase/label.cgi?id=100080>).

Blood-based proteomic data were generated by the UK Biobank Pharma Proteomics Project (UKB-PPP) consortium through profiling plasma samples from 54,219 UK Biobank participants. Samples were analyzed using the Olink™ Explore 3072 Proximity Extension Assay (PEA), which quantifies 2,941 protein analytes representing 2,923 unique proteins across four panels (cardiometabolic, inflammation, neurology, and oncology)5. Stringent quality control was applied (details at https://biobank.ndph.ox.ac.uk/ukb/ukb/docs/PPP_Phase_1_QC_dataset_companion_doc.pdf), and Normalized Protein eXpression (NPX) values were derived from raw data to adjust for batch effects and enhance detection of low-abundance proteins, consistent with Olink recommendations and prior studies6–8. In this study, 2,920 proteins were included after excluding those with >50% missing data (see **6.Proteins list** for a full list).

**5. Statistical Analysis Details**

Linear regression models were implemented in R (version 4.2.0) using the lm function, with the Comparing Correlations test conducted via the cocor package9.Propensity-score matching used the MatchIt package, applying a 1:1 nearest-neighbour approach to balance baseline characteristics (age, gender, ethnicity, education, BMI, depression, and anxiety scores)10. Mediation analyses were performed using the lavaan and mediation packages, with 1000 bias-corrected bootstrap samples for significance testing11. Enrichment analyses used ClusterProfiler package for Gene Ontology (biological process, cellular component, molecular function) and ReactomePA package for pathway analysis, with Benjamini-Hochberg correction (FDR <0.05)12,13. The NIPALS algorithm used the pls package (https://cran.r-project.org/package=pls). The non-inferiority test, conducted in R, evaluated whether the psychiatric risk difference (resilient group vs. low-risk group) was below a predefined margin (Δ), with the null hypothesis that the difference exceeded Δ. The margin Δ was set as the smallest effect size of interest (SESOI), determined using G*Power sensitivity analyses targeting 80% power and a 0.05 significance level14.

**6.Proteins list**

2,920 proteins were included in analyses listed below:

A1BG; AAMDC; AARSD1; ABCA2; ABHD14B; ABL1; ABO; ABRAXAS2; ACAA1; ACADM; ACADSB; ACAN; ACE; ACE2; ACHE; ACOT13; ACOX1; ACP1; ACP5; ACP6; ACRBP; ACRV1; ACSL1; ACTA2; ACTN2; ACTN4; ACVRL1; ACY1; ACY3; ACYP1; ADA; ADA2; ADAM12; ADAM15; ADAM22; ADAM23; ADAM8; ADAM9; ADAMTS1; ADAMTS13; ADAMTS15; ADAMTS16; ADAMTS4; ADAMTS8; ADAMTSL2; ADAMTSL4; ADAMTSL5; ADCYAP1R1; ADD1; ADGRB3; ADGRD1; ADGRE1; ADGRE2; ADGRE5; ADGRF5; ADGRG1; ADGRG2; ADGRV1; ADH1B; ADH4; ADIPOQ; ADM; ADRA2A; AFAP1; AFM; AFP; AGBL2; AGER; AGR2; AGR3; AGRN; AGRP; AGT; AGXT; AHCY; AHNAK; AHNAK2; AHSA1; AHSG; AHSP; AIDA; AIF1; AIF1L; AIFM1; AK1; AK2; AKAP12; AKR1B1; AKR1B10; AKR1C4; AKR7L; AKT1S1; AKT2; AKT3; ALCAM; ALDH1A1; ALDH2; ALDH3A1; ALDH5A1; ALMS1; ALPI; ALPP; AMBN; AMBP; AMDHD2; AMFR; AMIGO1; AMIGO2; AMN; AMOT; AMOTL2; AMPD3; AMY1A_AMY1B_AMY1C; AMY2A; AMY2B; ANG; ANGPT1; ANGPT2; ANGPTL1; ANGPTL2; ANGPTL3; ANGPTL4; ANGPTL7; ANK2; ANKMY2; ANKRA2; ANKRD54; ANP32C; ANPEP; ANXA1; ANXA10; ANXA11; ANXA2; ANXA3; ANXA4; ANXA5; AOC1; AOC3; AP1G2; AP2B1; AP3B1; AP3S2; APBB1IP; APCS; APEX1; APLP1; APOA1; APOA2; APOA4; APOB; APOBR; APOC1; APOD; APOE; APOF; APOH; APOL1; APOM; APP; APPL2; APRT; ARAF; AREG; ARF6; ARFIP1; ARG1; ARG2; ARHGAP1; ARHGAP25; ARHGAP30; ARHGAP45; ARHGAP5; ARHGEF1; ARHGEF10; ARHGEF12; ARHGEF5; ARID3A; ARID4B; ARL13B; ARL2BP; ARMCX2; ARNT; ARNTL; ARSA; ARSB; ART3; ART5; ARTN; ASAH1; ASAH2; ASGR1; ASGR2; ASPN; ASPSCR1; ASRGL1; ASS1; ATF2; ATF4; ATG16L1; ATG4A; ATOX1; ATP1B1; ATP1B2; ATP1B3; ATP1B4; ATP2B4; ATP5F1D; ATP5IF1; ATP5PO; ATP6AP2; ATP6V1D; ATP6V1F; ATP6V1G1; ATP6V1G2; ATRAID; ATRN; ATXN10; ATXN2; ATXN2L; ATXN3; AXIN1; AXL; AZI2; AZU1; B2M; B3GAT3; B3GNT7; B4GALT1; B4GAT1; BABAM1; BACH1; BAG3; BAG4; BAG6; BAIAP2; BAMBI; BANK1; BAP18; BATF; BAX; BCAM; BCAN; BCAT1; BCAT2; BCHE; BCL2; BCL2L1; BCL2L11; BCL2L15; BCL7A; BCL7B; BCR; BDNF; BECN1; BEX3; BGLAP; BGN; BHLHE40; BHMT2; BID; BIN2; BIRC2; BLMH; BLNK; BLOC1S2; BLOC1S3; BLVRB; BMP10; BMP4; BMP6; BMPER; BNIP2; BNIP3L; BOC; BOLA1; BOLA2_BOLA2B; BPIFA2; BPIFB1; BPIFB2; BRAP; BRD1; BRD2; BRD3; BRDT; BRK1; BRME1; BRSK2; BSG; BSND; BST1; BST2; BTC; BTD; BTLA; BTN1A1; BTN2A1; BTN3A2; BTNL10; C19orf12; C1GALT1C1; C1QA; C1QBP; C1QL2; C1QTNF1; C1QTNF5; C1QTNF6; C1QTNF9; C1R; C1RL; C1S; C2; C2CD2L; C2orf69; C3; C4BPB; C5; C7; C7orf50; C8B; C9; C9orf40; CA1; CA11; CA12; CA13; CA14; CA2; CA3; CA4; CA5A; CA6; CA7; CA8; CA9; CABP2; CACNA1C; CACNA1H; CACNB1; CACNB3; CACYBP; CADPS; CALB1; CALB2; CALCA; CALCB; CALCOCO1; CALCOCO2; CALY; CAMKK1; CAMLG; CAMSAP1; CANT1; CAPG; CAPN3; CAPS; CARHSP1; CASC3; CASP1; CASP10; CASP2; CASP3; CASP4; CASP7; CASP8; CASP9; CASQ2; CAT; CBLIF; CBLN1; CBLN4; CBS; CBX2; CC2D1A; CCAR2; CCDC134; CCDC28A; CCDC50; CCDC80; CCER2; CCL11; CCL13; CCL14; CCL15; CCL16; CCL17; CCL18; CCL19; CCL2; CCL20; CCL21; CCL22; CCL23; CCL24; CCL25; CCL26; CCL27; CCL28; CCL3; CCL4; CCL5; CCL7; CCL8; CCN1; CCN2; CCN3; CCN4; CCN5; CCND2; CCNE1; CCS; CCT5; CD101; CD109; CD14; CD160; CD163; CD164; CD164L2; CD177; CD1C; CD2; CD200; CD200R1; CD207; CD209; CD22; CD226; CD244; CD248; CD27; CD274; CD276; CD28; CD2AP; CD300A; CD300C; CD300E; CD300LF; CD300LG; CD302; CD33; CD34; CD36; CD38; CD3D; CD3E; CD3G; CD4; CD40; CD40LG; CD46; CD48; CD5; CD55; CD58; CD59; CD5L; CD6; CD63; CD69; CD7; CD70; CD72; CD74; CD79B; CD80; CD82; CD83; CD84; CD86; CD8A; CD93; CD99; CD99L2; CDA; CDAN1; CDC123; CDC25A; CDC26; CDC27; CDC37; CDC42BPB; CDCP1; CDH1; CDH15; CDH17; CDH2; CDH22; CDH23; CDH3; CDH4; CDH5; CDH6; CDHR1; CDHR2; CDHR5; CDK1; CDK5RAP3; CDKL5; CDKN1A; CDKN2D; CDNF; CDON; CDSN; CEACAM1; CEACAM16; CEACAM18; CEACAM19; CEACAM20; CEACAM21; CEACAM3; CEACAM5; CEACAM6; CEACAM8; CEBPA; CEBPB; CELA2A; CELA3A; CELSR2; CEMIP2; CEND1; CENPF; CENPJ; CEP112; CEP152; CEP164; CEP170; CEP20; CEP290; CEP350; CEP43; CEP85; CERT; CES1; CES2; CES3; CETN2; CETN3; CFB; CFC1; CFD; CFH; CFHR2; CFHR4; CFHR5; CFI; CFP; CGA; CGB3_CGB5_CGB8; CGN; CGREF1; CHAC2; CHAD; CHCHD10; CHCHD6; CHEK2; CHGA; CHGB; CHI3L1; CHIT1; CHL1; CHM; CHMP1A; CHMP6; CHP1; CHRDL1; CHRDL2; CHRM1; CIAPIN1; CILP; CINP; CIRBP; CIT; CKAP4; CKB; CKMT1A_CKMT1B; CLASP1; CLC; CLEC10A; CLEC11A; CLEC12A; CLEC14A; CLEC1A; CLEC1B; CLEC2L; CLEC3B; CLEC4A; CLEC4C; CLEC4D; CLEC4G; CLEC4M; CLEC5A; CLEC6A; CLEC7A; CLGN; CLIC5; CLINT1; CLIP2; CLMP; CLNS1A; CLPP; CLPS; CLSPN; CLSTN1; CLSTN2; CLSTN3; CLTA; CLU; CLUL1; CMC1; CMIP; CNDP1; CNGB3; CNP; CNPY2; CNPY4; CNST; CNTF; CNTN1; CNTN2; CNTN3; CNTN4; CNTN5; CNTNAP2; CNTNAP4; COCH; COL15A1; COL18A1; COL1A1; COL24A1; COL28A1; COL2A1; COL3A1; COL4A1; COL4A4; COL5A1; COL6A3; COL9A1; COL9A2; COLEC12; COMMD1; COMMD9; COMP; COMT; COPB2; COPE; COQ7; CORO1A; CORO6; COX5B; COX6B1; CPA1; CPA2; CPA4; CPB1; CPB2; CPE; CPLX2; CPM; CPOX; CPPED1; CPQ; CPTP; CPVL; CPXM1; CPXM2; CR1; CR2; CRACR2A; CRADD; CREB3; CREBZF; CREG1; CRELD1; CRELD2; CRH; CRHBP; CRHR1; CRIM1; CRIP2; CRISP2; CRISP3; CRKL; CRLF1; CRNN; CRTAC1; CRTAM; CRTAP; CRX; CRYBB1; CRYBB2; CRYGD; CRYM; CRYZL1; CSDE1; CSF1; CSF1R; CSF2; CSF2RA; CSF2RB; CSF3; CSF3R; CSH1; CSNK1D; CSNK2A1; CSPG4; CSPG5; CSRP3; CST1; CST3; CST5; CST6; CST7; CSTB; CTAG1A_CTAG1B; CTBS; CTF1; CTHRC1; CTLA4; CTNNA1; CTRB1; CTRC; CTRL; CTSB; CTSC; CTSD; CTSE; CTSF; CTSH; CTSL; CTSO; CTSS; CTSV; CTSZ; CUZD1; CWC15; CX3CL1; CXADR; CXCL1; CXCL10; CXCL11; CXCL12; CXCL13; CXCL14; CXCL16; CXCL17; CXCL3; CXCL5; CXCL6; CXCL8; CXCL9; CYB5A; CYB5R2; CYP24A1; CYTH3; CYTL1; DAAM1; DAB2; DAG1; DAND5; DAPK2; DAPP1; DARS1; DBH; DBI; DBN1; DBNL; DCBLD2; DCC; DCDC2C; DCLRE1C; DCN; DCTD; DCTN1; DCTN2; DCTN6; DCTPP1; DCUN1D1; DCUN1D2; DCXR; DDA1; DDAH1; DDC; DDHD2; DDI2; DDR1; DDT; DDX1; DDX25; DDX39A; DDX4; DDX53; DDX58; DECR1; DEFA1_DEFA1B; DEFB103A_DEFB103B; DEFB104A_DEFB104B; DEFB116; DEFB118; DEFB4A_DEFB4B; DENND2B; DENR; DFFA; DGCR6; DGKA; DGKZ; DHODH; DHPS; DHRS4L2; DIABLO; DIPK1C; DIPK2B; DKK1; DKK3; DKK4; DKKL1; DLG4; DLGAP5; DLK1; DLL1; DLL4; DMD; DMP1; DNAJA1; DNAJA2; DNAJA4; DNAJB1; DNAJB14; DNAJB2; DNAJB6; DNAJB8; DNAJC21; DNAJC6; DNAJC9; DNER; DNLZ; DNM1; DNM3; DNMBP; DNPEP; DNPH1; DOC2B; DOCK9; DOK1; DOK2; DPEP1; DPEP2; DPP10; DPP4; DPP6; DPP7; DPT; DPY30; DRAXIN; DRG2; DSC2; DSCAM; DSG2; DSG3; DSG4; DTD1; DTNB; DTX2; DTX3; DTYMK; DUOX2; DUSP13; DUSP29; DUSP3; DUT; DXO; DYNC1H1; DYNLT1; DYNLT3; EBAG9; EBI3_IL27; ECE1; ECHDC3; ECHS1; ECI2; ECM1; ECSCR; EDA2R; EDAR; EDDM3B; EDEM2; EDF1; EDIL3; EDN1; EDNRB; EEF1D; EFCAB14; EFCAB2; EFEMP1; EFHD1; EFNA1; EFNA4; EFNB2; EGF; EGFL7; EGFLAM; EGFR; EGLN1; EHBP1; EHD3; EIF1AX; EIF2AK2; EIF2AK3; EIF2S2; EIF4B; EIF4E; EIF4EBP1; EIF4G1; EIF4G3; EIF5; EIF5A; ELAC1; ELAVL4; ELN; ELOA; ELOB; ENAH; ENDOU; ENG; ENO1; ENO2; ENO3; ENOPH1; ENOX2; ENPEP; ENPP2; ENPP5; ENPP6; ENPP7; ENSA; ENTPD2; ENTPD5; ENTPD6; ENTR1; EP300; EPB41L5; EPCAM; EPGN; EPHA1; EPHA10; EPHA2; EPHA4; EPHB4; EPHB6; EPHX2; EPN1; EPO; EPPK1; EPS8L2; ERBB2; ERBB3; ERBB4; ERBIN; ERC2; ERCC1; EREG; ERI1; ERMAP; ERN1; ERP29; ERP44; ERVV-1; ESAM; ESM1; ESPL1; ESR1; ESYT2; EVI2B; EVI5; EVPL; EXOSC10; EXTL1; EZR; F10; F11; F11R; F12; F13B; F2; F2R; F3; F7; F9; FABP1; FABP2; FABP3; FABP4; FABP5; FABP6; FABP9; FADD; FAM13A; FAM171A2; FAM171B; FAM172A; FAM20A; FAM3B; FAM3C; FAM3D; FAP; FARSA; FAS; FASLG; FBLN2; FBN2; FBP1; FCAMR; FCAR; FCER1A; FCER2; FCGR2A; FCGR2B; FCGR3B; FCN1; FCN2; FCRL1; FCRL2; FCRL3; FCRL5; FCRL6; FCRLB; FDX1; FDX2; FEN1; FES; FETUB; FGA; FGD3; FGF12; FGF16; FGF19; FGF2; FGF20; FGF21; FGF23; FGF3; FGF5; FGF6; FGF7; FGF9; FGFBP1; FGFBP2; FGFBP3; FGFR2; FGFR4; FGL1; FGR; FH; FHIP2A; FHIT; FIS1; FKBP14; FKBP1B; FKBP4; FKBP5; FKBP7; FKBPL; FLI1; FLRT2; FLT1; FLT3; FLT3LG; FLT4; FMNL1; FMR1; FN1; FNDC1; FNTA; FOLH1; FOLR1; FOLR2; FOLR3; FOS; FOSB; FOXJ3; FOXO1; FOXO3; FRMD4B; FRMD7; FRZB; FSHB; FST; FSTL1; FSTL3; FTCD; FUCA1; FUOM; FURIN; FUS; FUT1; FUT3_FUT5; FUT8; FXN; FXYD5; FYB1; FZD10; FZD8; GABARAP; GABARAPL1; GABRA4; GAD1; GAD2; GADD45B; GADD45GIP1; GAGE2A; GAL; GALNT10; GALNT2; GALNT3; GALNT5; GALNT7; GAMT; GAPDH; GART; GAS2; GAS6; GASK1A; GAST; GATA3; GATD3; GBA; GBP1; GBP2; GBP4; GBP6; GC; GCC1; GCG; GCHFR; GCLM; GCNT1; GDF15; GDF2; GDNF; GET3; GFAP; GFER; GFOD2; GFRA1; GFRA2; GFRA3; GFRAL; GGA1; GGACT; GGCT; GGH; GGT1; GGT5; GH1; GH2; GHR; GHRHR; GHRL; GID8; GIGYF2; GIMAP7; GIMAP8; GIP; GIPC2; GIPC3; GIPR; GIT1; GJA8; GKN1; GLA; GLB1; GLI2; GLO1; GLOD4; GLP1R; GLRX; GLRX5; GLT8D2; GLYR1; GM2A; GMFG; GMPR; GMPR2; GNAS; GNE; GNGT1; GNLY; GNPDA1; GNPDA2; GOLGA3; GOLM2; GOPC; GORASP2; GOT1; GP1BA; GP1BB; GP2; GP5; GP6; GPA33; GPC1; GPC5; GPD1; GPHA2; GPI; GPIHBP1; GPKOW; GPNMB; GPR101; GPR158; GPR15L; GPR37; GPRC5C; GRAP2; GRHPR; GRIK2; GRIN2B; GRK5; GRN; GRP; GRPEL1; GRSF1; GSAP; GSN; GSR; GSTA1; GSTA3; GSTM4; GSTP1; GSTT2B; GTF2IRD1; GTPBP2; GUCA2A; GUCY2C; GUK1; GUSB; GYS1; GZMA; GZMB; GZMH; H2AP; HADH; HAGH; HAO1; HARS1; HAVCR1; HAVCR2; HBEGF; HBQ1; HBZ; HCG22; HCLS1; HDAC8; HDAC9; HDDC2; HDGF; HDGFL2; HEBP1; HEG1; HEPACAM2; HEPH; HEXIM1; HGF; HGFAC; HGS; HHEX; HIF1A; HIP1; HIP1R; HJV; HK2; HLA-A; HLA-DRA; HLA-E; HMBS; HMCN2; HMGCL; HMGCS1; HMMR; HMOX1; HMOX2; HNF1A; HNMT; HNRNPK; HNRNPUL1; HPCAL1; HPGDS; HPSE; HRAS; HRC; HRG; HS1BP3; HS3ST3B1; HS6ST1; HS6ST2; HSBP1; HSD11B1; HSD17B14; HSD17B3; HSDL2; HSP90B1; HSPA1A; HSPA2; HSPB1; HSPB6; HSPG2; HTR1A; HTR1B; HTRA2; HYAL1; HYOU1; ICA1; ICAM1; ICAM2; ICAM3; ICAM4; ICAM5; ICOSLG; ID4; IDI2; IDO1; IDS; IDUA; IFI30; IFIT1; IFIT3; IFNAR1; IFNG; IFNGR1; IFNGR2; IFNL1; IFNL2; IFNLR1; IFNW1; IFT20; IGBP1; IGDCC3; IGDCC4; IGF1R; IGF2BP3; IGF2R; IGFBP1; IGFBP2; IGFBP3; IGFBP4; IGFBP6; IGFBP7; IGFBPL1; IGFL4; IGHMBP2; IGLC2; IGLON5; IGSF21; IGSF3; IGSF8; IGSF9; IKBKG; IKZF2; IL10; IL10RA; IL10RB; IL11; IL12A_IL12B; IL12B; IL12RB1; IL12RB2; IL13; IL13RA1; IL13RA2; IL15; IL15RA; IL16; IL17A; IL17C; IL17D; IL17F; IL17RA; IL17RB; IL18; IL18BP; IL18R1; IL18RAP; IL19; IL1A; IL1B; IL1R1; IL1R2; IL1RAP; IL1RL1; IL1RL2; IL1RN; IL2; IL20; IL20RA; IL20RB; IL21R; IL22; IL22RA1; IL24; IL25; IL2RA; IL2RB; IL2RG; IL3; IL31; IL31RA; IL32; IL33; IL34; IL36A; IL36G; IL3RA; IL4; IL4R; IL5; IL5RA; IL6; IL6R; IL6ST; IL7; IL7R; IL9; ILKAP; IMMT; IMPA1; IMPACT; IMPG1; ING1; INHBB; INHBC; INPP1; INPP5D; INPP5J; INPPL1; INSL3; INSL4; INSL5; INSR; IPCEF1; IQGAP2; IRAG2; IRAK1; IRAK4; ISLR2; ISM1; ISM2; IST1; ITGA11; ITGA2; ITGA5; ITGA6; ITGAL; ITGAM; ITGAV; ITGAX; ITGB1; ITGB1BP1; ITGB1BP2; ITGB2; ITGB5; ITGB6; ITGB7; ITGBL1; ITIH1; ITIH3; ITIH4; ITIH5; ITM2A; ITPA; ITPR1; ITPRIP; IVD; IZUMO1; JAM2; JAM3; JCHAIN; JMJD1C; JPT2; JUN; KAZALD1; KAZN; KCNC4; KCNH2; KCNIP4; KCTD5; KDM3A; KDR; KEL; KHDC3L; KHK; KIAA0319; KIAA1549; KIAA1549L; KIAA2013; KIF1C; KIF20B; KIF22; KIFBP; KIR2DL2; KIR2DL3; KIR2DS4; KIR3DL1; KIR3DL2; KIRREL1; KIRREL2; KIT; KITLG; KLB; KLF4; KLHL41; KLK1; KLK10; KLK11; KLK12; KLK13; KLK14; KLK15; KLK3; KLK4; KLK6; KLK7; KLK8; KLKB1; KLRB1; KLRC1; KLRD1; KLRF1; KLRK1; KRT14; KRT17; KRT18; KRT19; KRT5; KRT6C; KRT8; KYAT1; KYNU; L1CAM; L3HYPDH; LACRT; LACTB2; LAG3; LAIR1; LAIR2; LAMA1; LAMA4; LAMB1; LAMP1; LAMP2; LAMP3; LAMTOR5; LAP3; LARP1; LAT; LAT2; LATS1; LAYN; LBP; LBR; LCAT; LCN15; LCN2; LCP1; LDLR; LDLRAP1; LECT2; LEFTY2; LEG1; LELP1; LEO1; LEP; LEPR; LETM1; LGALS1; LGALS3; LGALS3BP; LGALS4; LGALS7_LGALS7B; LGALS8; LGALS9; LGMN; LHB; LHPP; LIF; LIFR; LILRA2; LILRA3; LILRA4; LILRA5; LILRA6; LILRB1; LILRB2; LILRB4; LILRB5; LIPF; LMNB1; LMNB2; LMOD1; LMOD2; LONP1; LPA; LPCAT2; LPL; LPO; LPP; LRCH4; LRFN2; LRG1; LRIG1; LRIG3; LRP1; LRP11; LRP2; LRP2BP; LRPAP1; LRRC25; LRRC37A2; LRRC38; LRRC59; LRRFIP1; LRRN1; LRTM1; LRTM2; LSM1; LSM8; LSP1; LTA; LTA4H; LTB; LTBP2; LTBP3; LTBR; LTO1; LUZP2; LXN; LY6D; LY75; LY9; LY96; LYAR; LYN; LYPD1; LYPD3; LYPD8; LYPLA2; LYSMD3; LYVE1; LYZL2; LZTFL1; M6PR; MAD1L1; MAEA; MAG; MAGEA3; MAGED1; MAMDC2; MAMDC4; MAN1A2; MAN2B2; MANEAL; MANF; MANSC1; MANSC4; MAP1LC3A; MAP1LC3B2; MAP2; MAP2K1; MAP2K6; MAP3K5; MAP4K5; MAPK13; MAPK9; MAPKAPK2; MAPRE3; MAPT; MARCO; MARS1; MASP1; MATN2; MATN3; MAVS; MAX; MB; MBL2; MCAM; MCEE; MCEMP1; MCFD2; MCTS1; MDGA1; MDH1; MDK; MDM1; MECR; MED18; MED21; MEGF10; MEGF11; MEGF9; MELTF; MENT; MEP1A; MEP1B; MEPE; MERTK; MESD; MET; METAP1; METAP1D; METAP2; MFAP3; MFAP3L; MFAP4; MFAP5; MFGE8; MGLL; MGMT; MIA; MICALL2; MICB_MICA; MIF; MILR1; MINDY1; MINK1; MITD1; MKI67; MLLT1; MLN; MME; MMP1; MMP10; MMP12; MMP13; MMP15; MMP3; MMP7; MMP8; MMP9; MMUT; MN1; MNAT1; MNDA; MOCS2; MOG; MORC3; MORF4L1; MORF4L2; MORN4; MPHOSPH8; MPI; MPIG6B; MPO; MPRIP; MRC1; MRI1; MRPL24; MRPL28; MRPL46; MRPL52; MRPL58; MRPS16; MSLN; MSLNL; MSMB; MSR1; MSRA; MST1; MSTN; MTDH; MTHFD2; MTHFSD; MTIF3; MTPN; MTR; MTSS1; MTSS2; MTUS1; MUC13; MUC16; MUC2; MUCL3; MVK; MXRA8; MYBPC1; MYBPC2; MYCBP2; MYDGF; MYH4; MYH7B; MYH9; MYL1; MYL3; MYL4; MYL6B; MYLPF; MYO6; MYO9B; MYOC; MYOM1; MYOM2; MYOM3; MZB1; MZT1; NAA10; NAA80; NAAA; NACC1; NADK; NAGA; NAGK; NAGPA; NAMPT; NAP1L4; NAPRT; NARS1; NBL1; NBN; NCAM1; NCAM2; NCAN; NCF2; NCK2; NCLN; NCR1; NCR3LG1; NCS1; NDRG1; NDST1; NDUFA5; NDUFB7; NDUFS6; NEB; NECAP2; NECTIN1; NECTIN2; NECTIN4; NEDD4L; NEDD9; NEFL; NEK7; NELL1; NELL2; NENF; NEO1; NEXN; NFASC; NFAT5; NFATC1; NFATC3; NFE2; NFIC; NFKB1; NFKB2; NFKBIE; NFU1; NFX1; NFYA; NGF; NGFR; NGRN; NHLRC3; NID1; NID2; NINJ1; NIT1; NIT2; NLGN1; NLGN2; NME1; NME3; NMI; NMNAT1; NMRK2; NMT1; NOMO1; NOP56; NOS1; NOS2; NOS3; NOTCH1; NOTCH2; NOTCH3; NPC2; NPDC1; NPHS1; NPHS2; NPL; NPPB; NPPC; NPR1; NPTN; NPTX1; NPTX2; NPTXR; NPY; NRCAM; NRGN; NRN1; NRP1; NRP2; NRTN; NRXN3; NSFL1C; NT5C; NT5C1A; NT5C3A; NT5E; NTF3; NTF4; NTproBNP; NTRK2; NTRK3; NUB1; NUBP1; NUCB2; NUDC; NUDT10; NUDT15; NUDT16; NUDT2; NUDT5; NUMB; NUP50; NXPE4; NXPH1; NXPH3; OBP2B; OCLN; ODAM; OFD1; OGA; OGFR; OGN; OGT; OLFM4; OLR1; OMD; OMG; OMP; OPHN1; OPLAH; OPTC; ORM1; OSBPL2; OSCAR; OSM; OSMR; OSTN; OTOA; OTUD6B; OTUD7B; OXCT1; OXT; P4HB; PACS2; PADI2; PADI4; PAEP; PAFAH1B3; PAFAH2; PAG1; PAGR1; PAIP2B; PAK4; PALLD; PALM; PALM2; PALM3; PAM; PAMR1; PAPPA; PARD3; PARK7; PARP1; PAXX; PBK; PBLD; PBXIP1; PCARE; PCBD1; PCBP2; PCDH1; PCDH12; PCDH17; PCDH7; PCDH9; PCDHB15; PCNA; PCSK7; PCSK9; PCYT2; PDAP1; PDCD1; PDCD1LG2; PDCD5; PDCD6; PDCL2; PDE1C; PDE4D; PDE5A; PDGFA; PDGFB; PDGFC; PDGFRA; PDGFRB; PDIA2; PDIA3; PDIA4; PDIA5; PDLIM5; PDLIM7; PDP1; PDRG1; PDXDC1; PDZD2; PDZK1; PEAR1; PEBP1; PECAM1; PECR; PENK; PEPD; PER3; PF4; PFDN2; PFDN4; PFDN6; PFKFB2; PGA4; PGD; PGF; PGLYRP1; PGLYRP2; PGLYRP4; PGM2; PGR; PHACTR2; PHLDB1; PHLDB2; PHOSPHO1; PHYKPL; PI16; PI3; PIBF1; PIGR; PIK3AP1; PIK3IP1; PIKFYVE; PILRA; PILRB; PINLYP; PITHD1; PKD1; PKD2; PKLR; PKN3; PLA2G10; PLA2G15; PLA2G1B; PLA2G2A; PLA2G4A; PLA2G7; PLAT; PLAU; PLAUR; PLB1; PLCB1; PLCB2; PLEKHO1; PLG; PLIN1; PLIN3; PLPBP; PLSCR3; PLTP; PLXDC1; PLXDC2; PLXNA4; PLXNB2; PLXNB3; PM20D1; PMCH; PMM2; PMS1; PMVK; PNLIP; PNLIPRP1; PNLIPRP2; PNMA1; PNMA2; PNPT1; PODXL; PODXL2; POF1B; POLR2A; POLR2F; POMC; PON1; PON2; PON3; POSTN; PPBP; PPCDC; PPIB; PPIE; PPIF; PPL; PPM1A; PPM1B; PPM1F; PPME1; PPP1CC; PPP1R12A; PPP1R12B; PPP1R14A; PPP1R14D; PPP1R2; PPP1R9B; PPP2R5A; PPP3R1; PPT1; PPY; PQBP1; PRAME; PRAP1; PRC1; PRCP; PRDX1; PRDX2; PRDX3; PRDX5; PRDX6; PREB; PRELP; PRG2; PRG3; PRKAB1; PRKAG3; PRKAR1A; PRKAR2A; PRKCQ; PRKD2; PRKG1; PRKRA; PRL; PRND; PROC; PROCR; PROK1; PROS1; PRR4; PRR5; PRRT3; PRSS2; PRSS22; PRSS27; PRSS53; PRSS8; PRTFDC1; PRTG; PRTN3; PRUNE2; PSAP; PSAPL1; PSCA; PSG1; PSIP1; PSMA1; PSMC3; PSMD1; PSMD5; PSMD9; PSME1; PSME2; PSMG3; PSMG4; PSPN; PSRC1; PSTPIP2; PTEN; PTGDS; PTGES2; PTGR1; PTH; PTH1R; PTK7; PTN; PTP4A3; PTPN1; PTPN6; PTPN9; PTPRB; PTPRC; PTPRF; PTPRH; PTPRK; PTPRM; PTPRN2; PTPRR; PTPRS; PTPRZ1; PTRHD1; PTS; PTTG1; PTX3; PVALB; PVR; PXDNL; PXN; PYDC1; PYY; PZP; QDPR; QPCT; QSOX1; RAB10; RAB11FIP3; RAB27B; RAB2B; RAB33A; RAB37; RAB39B; RAB3GAP1; RAB44; RAB6A; RAB6B; RABEP1; RABEPK; RABGAP1L; RAC3; RAD23B; RAD51; RALB; RALY; RANBP1; RANBP2; RANGAP1; RAP1A; RAPGEF2; RARRES1; RARRES2; RASA1; RASGRF1; RASSF2; RBFOX3; RBKS; RBM17; RBM19; RBM25; RBP1; RBP2; RBP5; RBP7; RBPMS; RBPMS2; RCC1; RCOR1; RECK; REEP4; REG1A; REG1B; REG3A; REG3G; REG4; RELB; RELT; REN; REPS1; REST; RET; RETN; REXO2; RFC4; RGCC; RGL2; RGMA; RGMB; RGS10; RGS8; RHOC; RICTOR; RIDA; RILP; RILPL2; RIPK4; RLN1; RLN2; RNASE1; RNASE10; RNASE3; RNASE4; RNASE6; RNASEH2A; RNASET2; RNF149; RNF168; RNF31; RNF4; RNF41; RNF43; RNF5; ROBO1; ROBO2; ROBO4; ROR1; RP2; RPA2; RPE; RPGR; RPL14; RPS10; RRAS; RRM2; RRM2B; RRP15; RSPO1; RSPO3; RTBDN; RTKN2; RTN4IP1; RTN4R; RUVBL1; RWDD1; RYR1; S100A11; S100A12; S100A13; S100A14; S100A16; S100A3; S100A4; S100G; S100P; SAA4; SAFB2; SAG; SAMD9L; SAP18; SARG; SART1; SAT1; SAT2; SATB1; SBSN; SCAMP3; SCARA5; SCARB1; SCARB2; SCARF1; SCARF2; SCG2; SCG3; SCGB1A1; SCGB2A2; SCGB3A1; SCGB3A2; SCGN; SCIN; SCLY; SCN2A; SCN2B; SCN3A; SCN3B; SCN4B; SCP2; SCPEP1; SCRG1; SCRIB; SCRN1; SCT; SDC1; SDC4; SDCCAG8; SDHB; SDK2; SEC31A; SEL1L; SELE; SELENOP; SELL; SELP; SELPLG; SEMA3F; SEMA3G; SEMA4C; SEMA4D; SEMA6C; SEMA7A; SEPTIN3; SEPTIN7; SEPTIN8; SEPTIN9; SERPINA1; SERPINA11; SERPINA12; SERPINA3; SERPINA4; SERPINA5; SERPINA6; SERPINA7; SERPINA9; SERPINB1; SERPINB5; SERPINB6; SERPINB8; SERPINB9; SERPINC1; SERPIND1; SERPINE1; SERPINE2; SERPINF1; SERPINF2; SERPING1; SERPINH1; SERPINI1; SERPINI2; SESTD1; SETMAR; SEZ6; SEZ6L; SEZ6L2; SF3B4; SFRP1; SFRP4; SFTPA1; SFTPA2; SFTPD; SGSH; SH2B3; SH2D1A; SH3BGRL2; SH3BP1; SH3GL3; SH3GLB2; SHBG; SHC1; SHD; SHH; SHISA5; SHMT1; SHPK; SIAE; SIGLEC1; SIGLEC10; SIGLEC15; SIGLEC5; SIGLEC6; SIGLEC7; SIGLEC8; SIGLEC9; SIL1; SIRPA; SIRPB1; SIRT1; SIRT2; SIRT5; SIT1; SKAP1; SKAP2; SKIV2L; SLA2; SLAMF1; SLAMF6; SLAMF7; SLAMF8; SLC12A2; SLC13A1; SLC16A1; SLC1A4; SLC27A4; SLC28A1; SLC34A3; SLC39A14; SLC39A5; SLC44A4; SLC4A1; SLC51B; SLC9A3R1; SLC9A3R2; SLIRP; SLIT2; SLITRK1; SLITRK2; SLITRK6; SLK; SLMAP; SLURP1; SMAD1; SMAD2; SMAD3; SMAD5; SMARCA2; SMC3; SMNDC1; SMOC1; SMOC2; SMPD1; SMPD3; SMPDL3A; SMPDL3B; SMS; SMTN; SNAP23; SNAP25; SNAP29; SNAPIN; SNCA; SNCG; SNED1; SNRPB2; SNU13; SNX15; SNX18; SNX2; SNX5; SNX9; SOD1; SOD2; SOD3; SORBS1; SORCS2; SORD; SORT1; SOST; SOWAHA; SOX2; SOX9; SPACA5_SPACA5B; SPAG1; SPARC; SPARCL1; SPART; SPESP1; SPINK1; SPINK2; SPINK4; SPINK5; SPINK6; SPINK8; SPINT1; SPINT2; SPINT3; SPOCK1; SPON1; SPON2; SPP1; SPRED2; SPRING1; SPRR1B; SPRR3; SPRY2; SPTBN2; SPTLC1; SRC; SRP14; SRPK2; SRPX; SSB; SSBP1; SSC4D; SSC5D; SSH3; SSNA1; ST13; ST3GAL1; ST6GAL1; ST8SIA1; STAB2; STAM; STAMBP; STAT2; STAT5B; STAU1; STC1; STC2; STEAP4; STIP1; STK11; STK24; STK4; STOML2; STX16; STX1B; STX3; STX4; STX5; STX6; STX7; STX8; STXBP1; STXBP3; SUGP1; SUGT1; SULT1A1; SULT2A1; SUMF1; SUMF2; SUOX; SUSD1; SUSD2; SUSD4; SUSD5; SV2A; SWAP70; SYAP1; SYNGAP1; SYT1; SYTL4; TAB2; TACC3; TACSTD2; TADA3; TAFA5; TAGLN3; TALDO1; TANK; TAP1; TARBP2; TARM1; TARS1; TAX1BP1; TBC1D17; TBC1D23; TBC1D5; TBCA; TBCB; TBCC; TBL1X; TBR1; TCL1A; TCL1B; TCN1; TCN2; TCOF1; TCP11; TCTN3; TDGF1; TDO2; TDP1; TDRKH; TEF; TEK; TERF1; TET2; TEX101; TEX33; TF; TFAP2A; TFF1; TFF2; TFF3; TFPI; TFPI2; TFRC; TG; TGFA; TGFB1; TGFB2; TGFBI; TGFBR1; TGFBR2; TGFBR3; TGM2; TGOLN2; THAP12; THBD; THBS2; THBS4; THOP1; THPO; THRAP3; THSD1; THTPA; THY1; TIA1; TIE1; TIGAR; TIGIT; TIMD4; TIMM10; TIMM8A; TIMP1; TIMP2; TIMP3; TIMP4; TINAGL1; TJAP1; TJP3; TK1; TLR1; TLR2; TLR3; TLR4; TMCO5A; TMED1; TMED10; TMED4; TMED8; TMEM106A; TMEM132A; TMEM25; TMOD4; TMPRSS11B; TMPRSS11D; TMPRSS15; TMPRSS5; TMSB10; TNC; TNF; TNFAIP2; TNFAIP8; TNFAIP8L2; TNFRSF10A; TNFRSF10B; TNFRSF10C; TNFRSF11A; TNFRSF11B; TNFRSF12A; TNFRSF13B; TNFRSF13C; TNFRSF14; TNFRSF17; TNFRSF19; TNFRSF1A; TNFRSF1B; TNFRSF21; TNFRSF4; TNFRSF6B; TNFRSF8; TNFRSF9; TNFSF10; TNFSF11; TNFSF12; TNFSF13; TNFSF13B; TNFSF14; TNFSF8; TNIP1; TNN; TNNI3; TNPO1; TNR; TNXB; TOMM20; TOP1; TOP1MT; TOP2B; TOR1AIP1; TP53; TP53BP1; TP53I3; TP53INP1; TP73; TPBGL; TPD52L2; TPK1; TPM3; TPMT; TPP1; TPPP2; TPPP3; TPR; TPRKB; TPSAB1; TPSD1; TPSG1; TPT1; TRAF2; TRAF3; TRAF3IP2; TRDMT1; TREH; TREM2; TREML1; TREML2; TRIAP1; TRIM21; TRIM24; TRIM25; TRIM26; TRIM40; TRIM5; TRIM58; TRPV3; TSC1; TSC22D1; TSHB; TSLP; TSNAX; TSPAN1; TSPAN15; TSPAN7; TSPAN8; TSPYL1; TST; TTF2; TTN; TTR; TUBB3; TWF2; TXK; TXLNA; TXN; TXNDC15; TXNDC5; TXNDC9; TXNL1; TXNRD1; TYMP; TYRO3; TYRP1; UBAC1; UBE2B; UBE2L6; UBE2Z; UBQLN3; UBXN1; UFD1; UGDH; UHRF2; ULBP2; UMOD; UNC5D; UNC79; UNG; UPB1; UPK3A; UPK3BL1; UROD; UROS; USO1; USP25; USP28; USP47; USP8; UXS1; VAMP5; VAMP8; VASH1; VASN; VASP; VAT1; VAV3; VCAM1; VCAN; VCPKMT; VEGFA; VEGFB; VEGFC; VEGFD; VGF; VIM; VIPR1; VIT; VMO1; VNN1; VNN2; VPS28; VPS37A; VPS4B; VPS53; VSIG10; VSIG10L; VSIG2; VSIG4; VSIR; VSNL1; VSTM1; VSTM2B; VSTM2L; VTA1; VTCN1; VTI1A; VWA1; VWA5A; VWC2; VWC2L; VWF; WARS; WAS; WASF1; WASF3; WASHC3; WASL; WDR46; WFDC1; WFDC12; WFDC2; WFIKKN1; WFIKKN2; WIF1; WNT9A; WWP2; XCL1; XG; XIAP; XPNPEP2; XRCC4; YAP1; YARS1; YES1; YJU2; YOD1; YTHDF3; YWHAQ; YY1; ZBP1; ZBTB16; ZBTB17; ZCCHC8; ZFYVE19; ZHX2; ZNF174; ZNF75D; ZNF830; ZNRD2; ZNRF4; ZP3; ZP4; ZPR1.

## **Appendix B. Supplementary Figures**


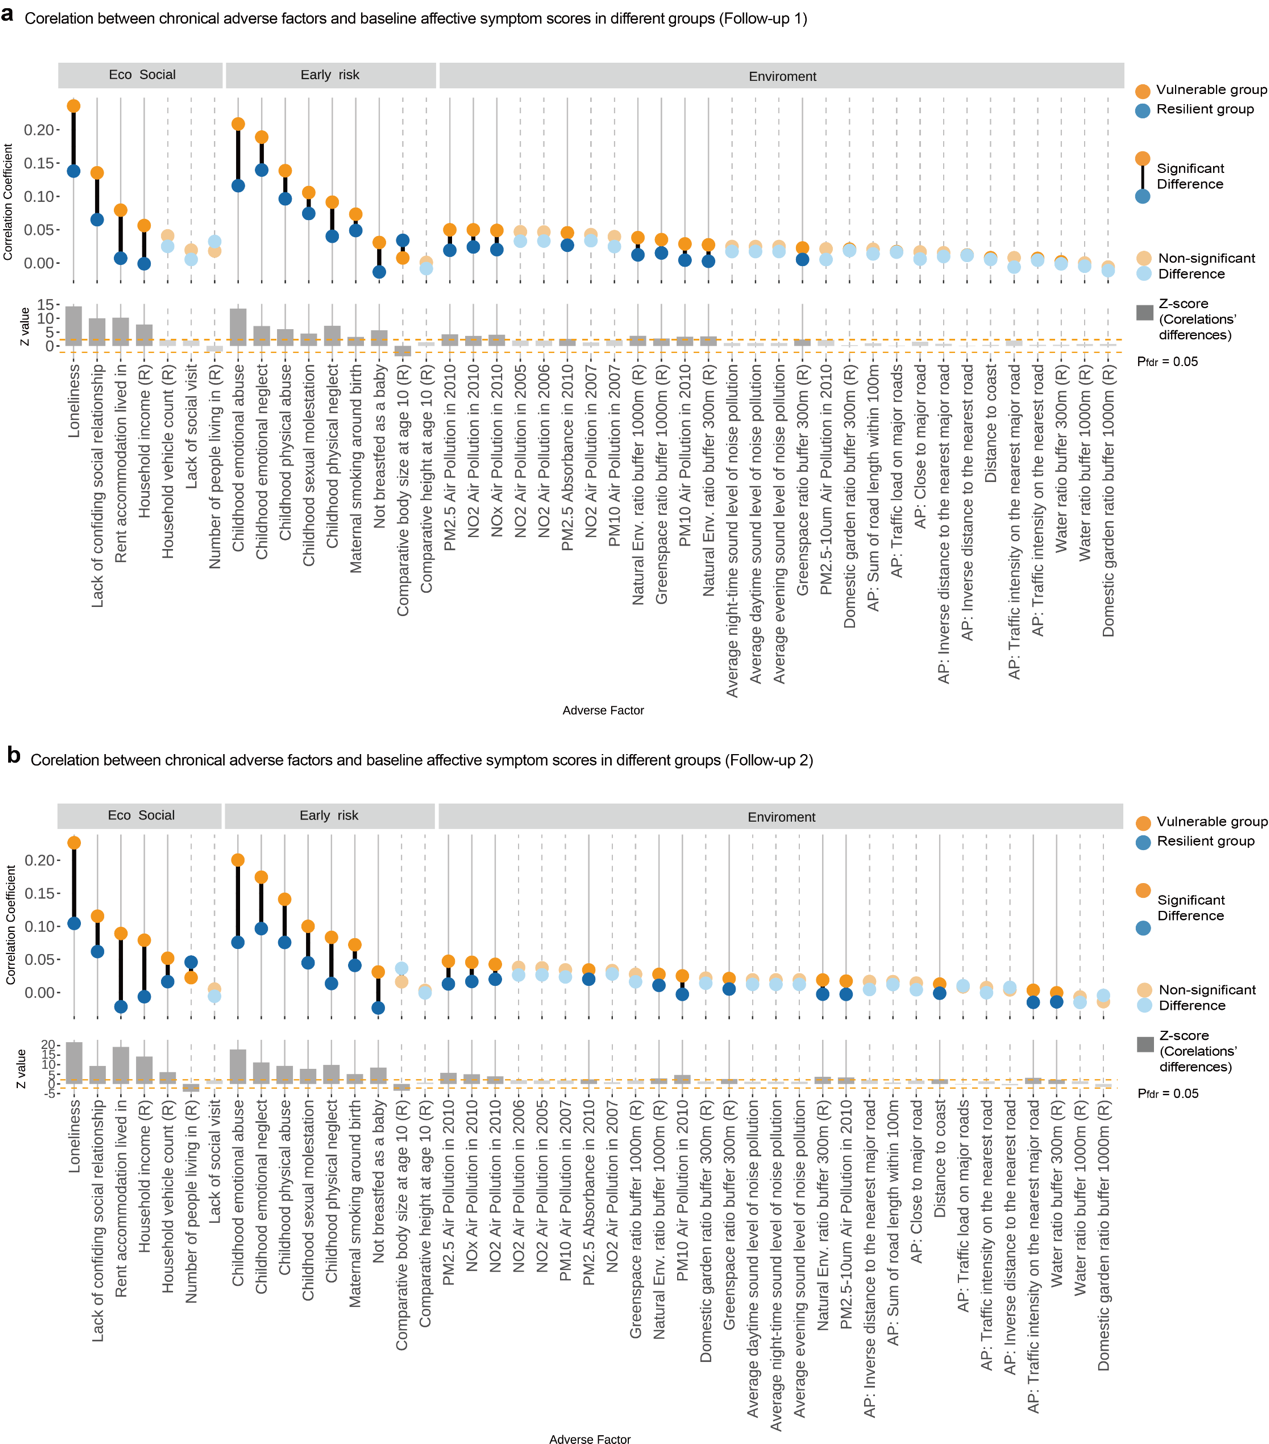


**Figure S1 Adverse factor-affective symptom associations in adaptive and vulnerable groups**

(**a**) Dumbbell plot of correlations between general adverse factors and affective symptoms at FU1 in resilient and vulnerable groups; significant differences (*PFDR* < 0.05) are marked; (**b**) Dumbbell plot of correlations between general adverse factors and affective symptoms at FU2 in resilient and vulnerable groups; significant differences (*PFDR* < 0.05) are marked.


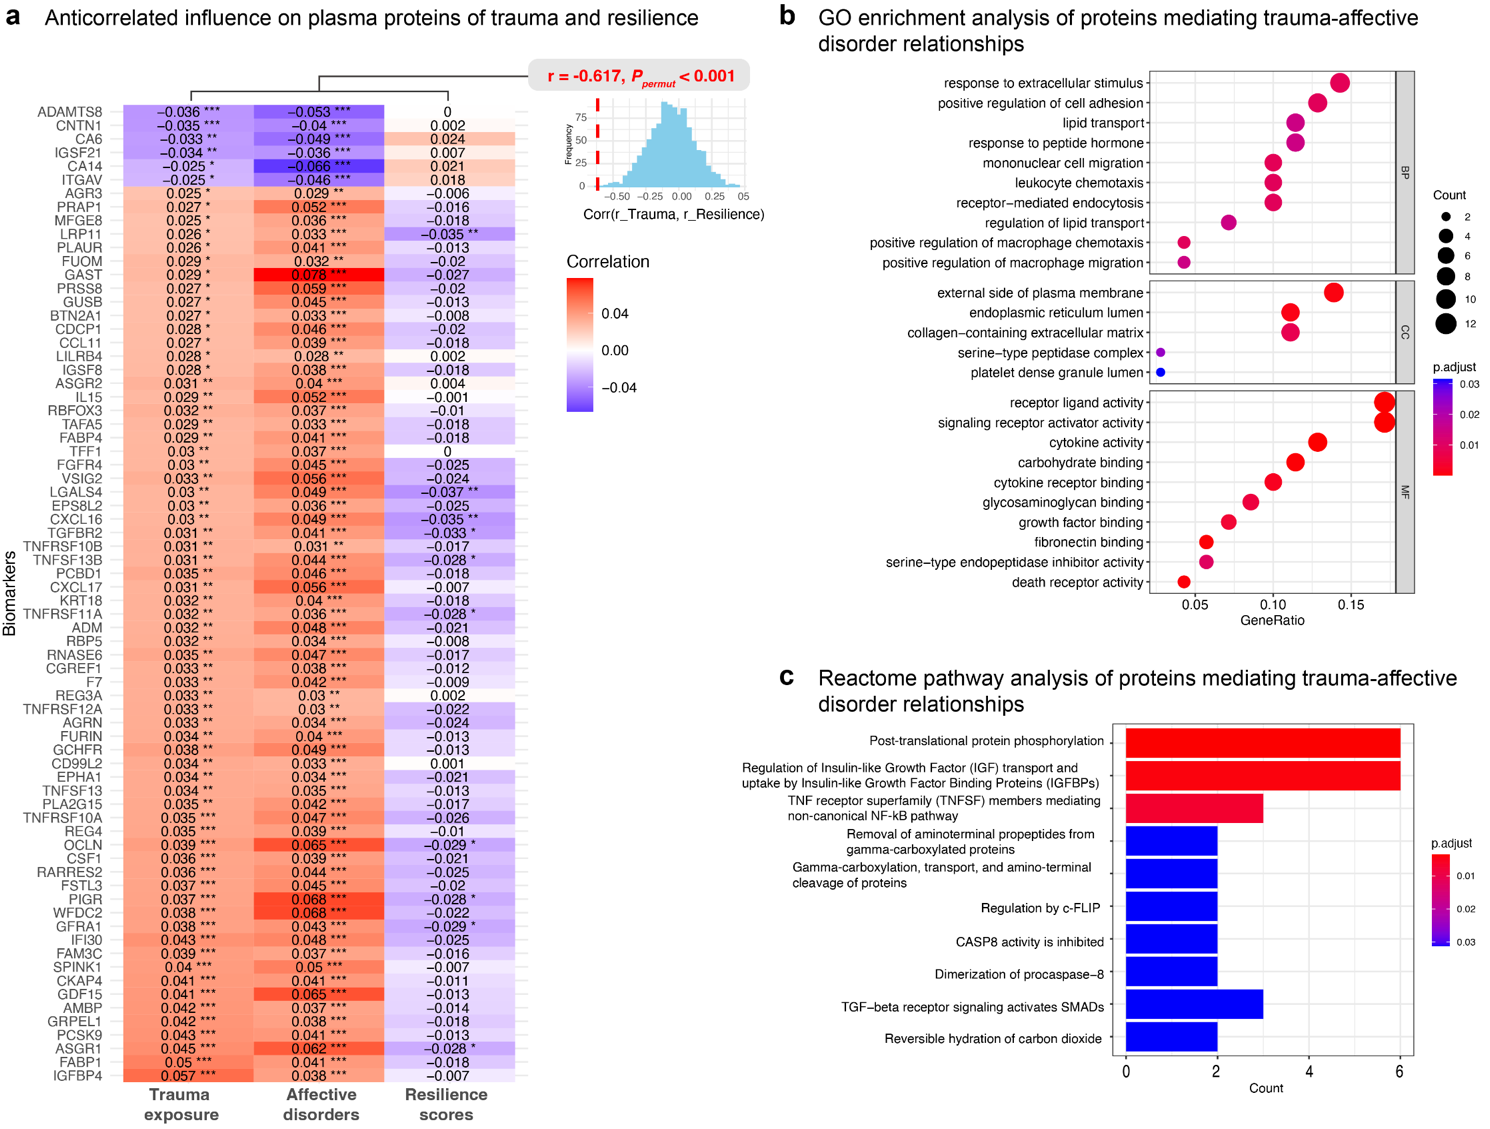


**Figure S2 The protective role of resilience on plasma protein admits trauma exposures.**

(a) Heatmap displaying partial correlations of 72 plasma proteins significantly mediating the relationship between trauma exposure and affective disorders (*P* < 0.001) with trauma exposure, affective disorders, and resilience scores, controlling for covariates (age, sex, site, education years, and BMI). Of these, 10 proteins overlapped between trauma and resilience, showing opposite correlation directions; the correlation pattern between trauma and resilience associations yielded r = −0.617 (*P* < 0.001, 1,000 permutation tests). (b) The results of Gene Ontology (GO) enrichment for the 72 proteins significantly mediating the trauma exposure-affective disorder relationship, presented in facets for Biological Process (BP), Cellular Component (CC), and Molecular Function (MF), ranked by enrichment significance. (c) Bar plot showing the top 10 enriched Reactome pathways for the 72 proteins significantly mediating the trauma exposure-affective disorder relationship, ranked by enrichment significance.


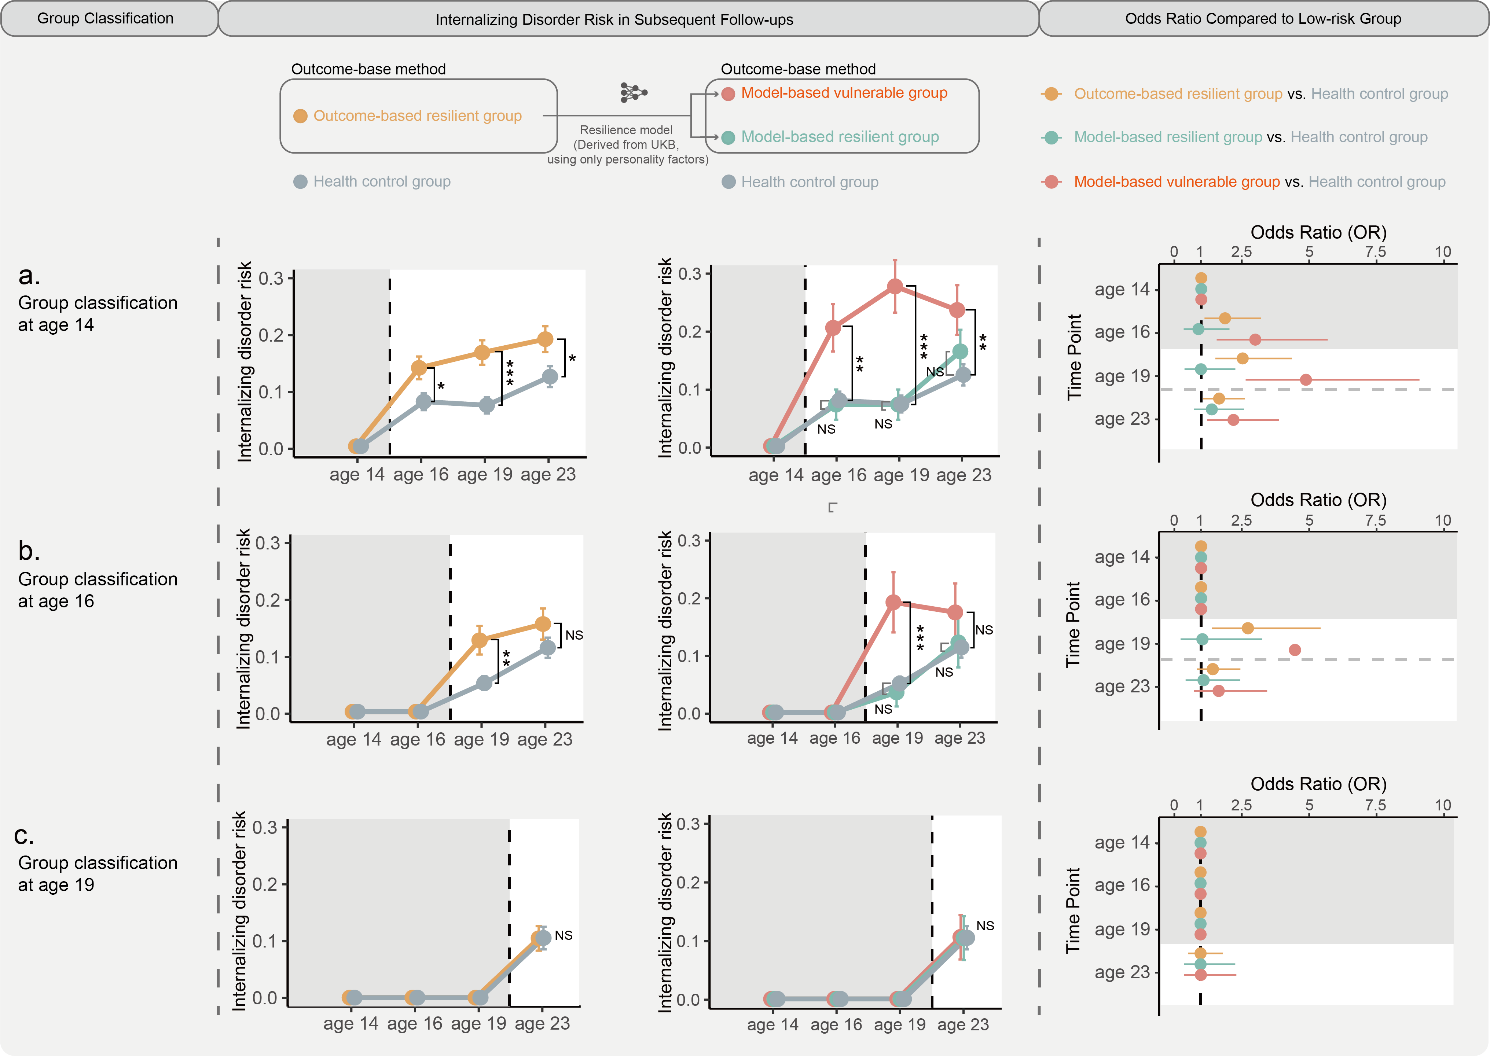


**Figure S3 Comparing model-based and outcome-based approaches (only personality factors) for resilient outcome prediction**

(a) Left: Line plot showing incidence rates of internalizing disorders at ages 16, 19, and 22 for groups categorized at age 14 using outcome-based and model-based methods, compared to the low-risk group (error bars: mean ± SE; * *P* < 0.05, ** *P* < 0.01, *** *P* < 0.001). The resilience model was trained on the UKB dataset using only personality factors for prediction. Right: Plot of odds ratios comparing each group to the low-risk group (error bars: 95% CI). (b) As in (a), but for groups categorized at age 16, with incidence rates at ages 19 and 22. (c) As in (a), but for groups categorized at age 19, with incidence rates at age 22.


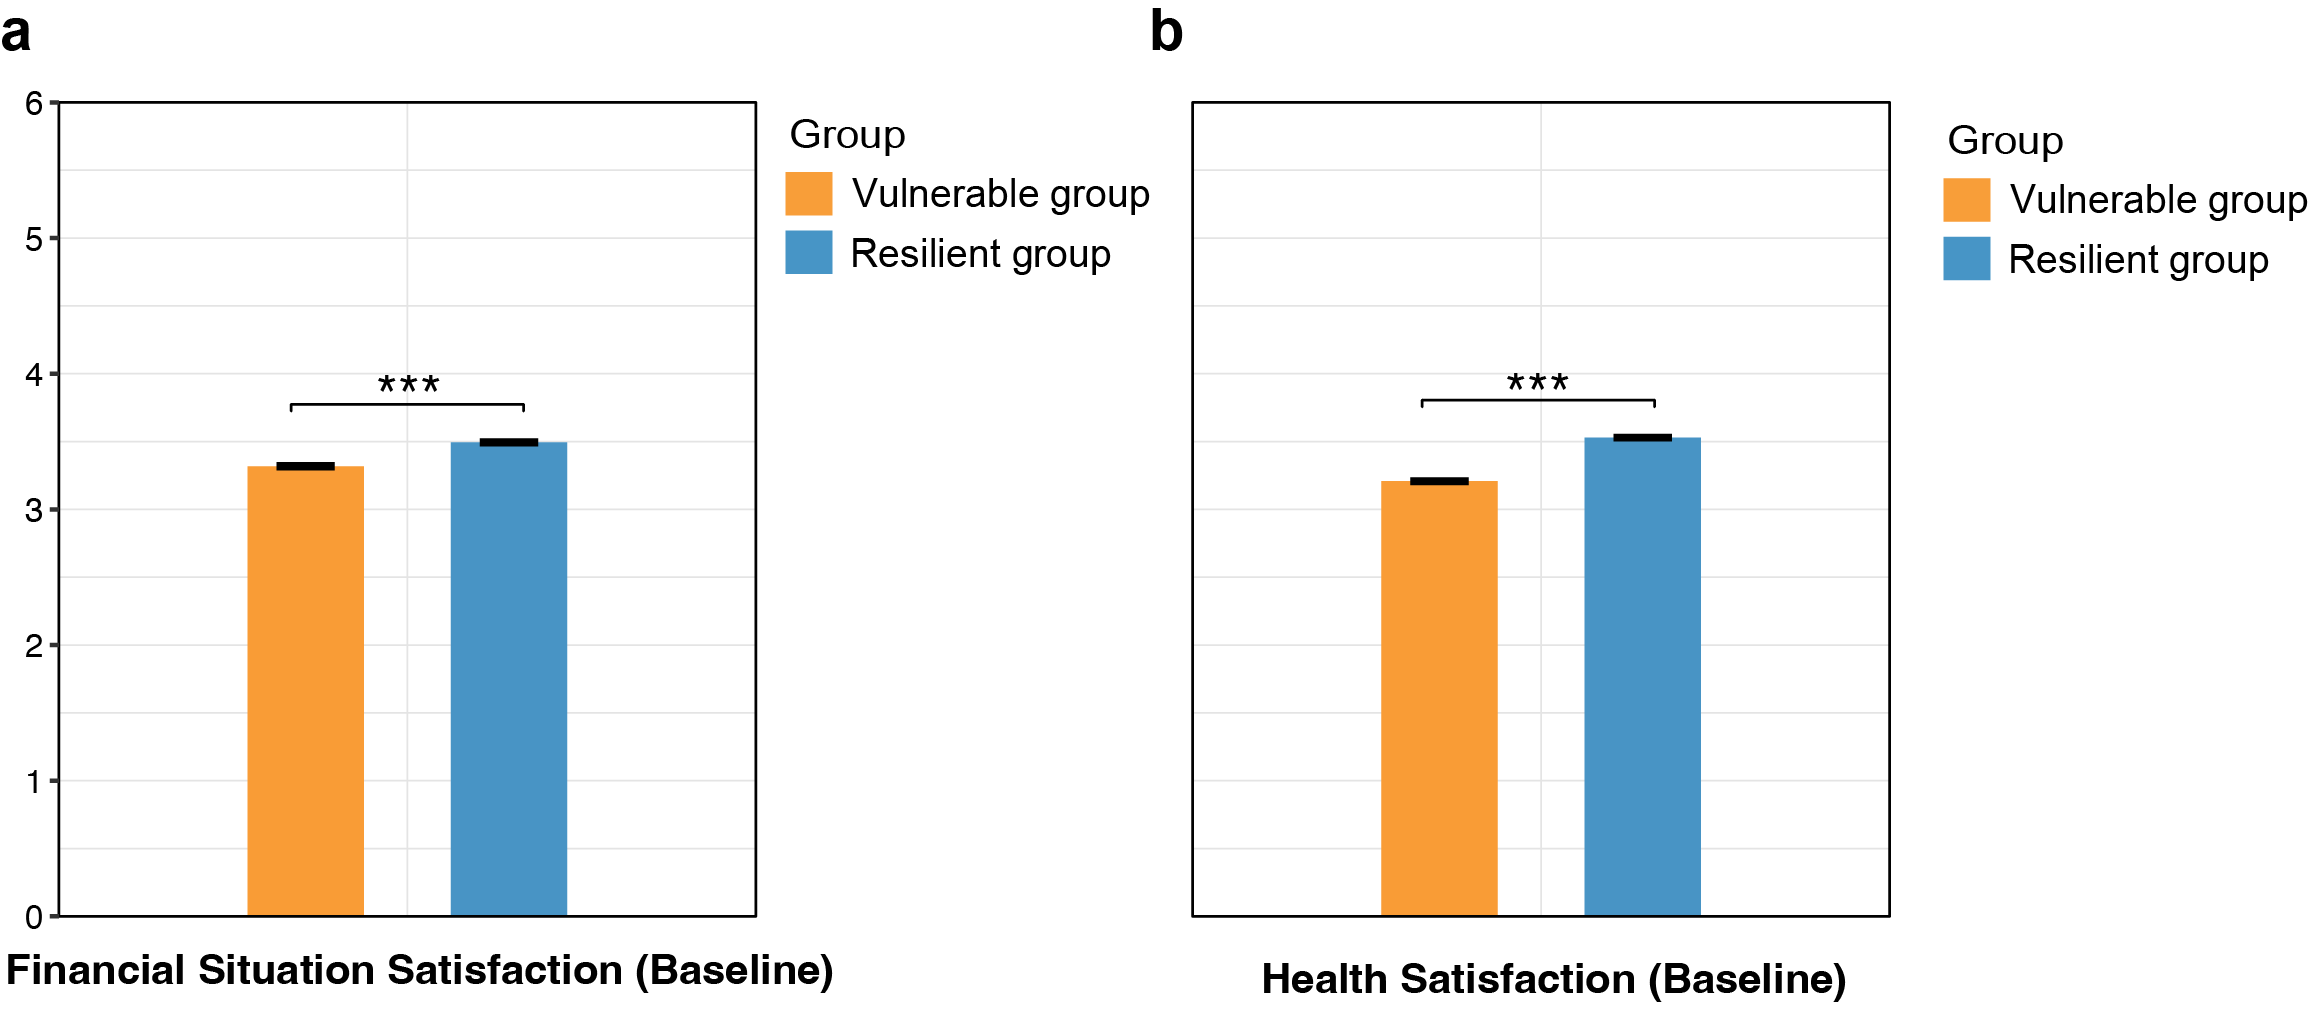


**Figure S4 Subjective satisfaction score differences in adaptive and vulnerable groups**

Bar plot of subjective satisfaction scores in resilient and vulnerable groups, matched for covariates (sex, age, ethnicity, education, BMI), objective financial indicators (household income, number of household cars, IMD, financial difficulties at BL), and health indicators (Frailty). (a) Financial satisfaction scores in the two groups. (b) Health satisfaction scores in the two groups. Scores are shown as mean ± SE, with significant differences marked (* *P* < 0.05, ** *P* < 0.01, *** *P* < 0.001).

## **Appendix C. Supplementary Tables**

**Table S1: List of recent traumatic events in UKB dataset**

| **Traumatic events** | **Data-Field** | **Collection time** |
| --- | --- | --- |
| Serious illness, injury or assault to yourself | 6145-0.0 | Baseline visit |
| Serious illness, injury or assault of a close relative | 6145-0.0 | Baseline visit |
| Death of a close relative | 6145-0.0 | Baseline visit |
| Death of a spouse or partner | 6145-0.0 | Baseline visit |
| Marital separation/divorce | 6145-0.0 | Baseline visit |
| Financial difficulties | 6145-0.0 | Baseline visit |
| Victim of sexual assault | 20531-0.0 | Follow-up 1 |
| Victim of physically violent crime | 20529-0.0 | Follow-up 1 |
| Been in serious accident believed to be life-threatening | 20526-0.0 | Follow-up 1 |
| Witnessed sudden violent death | 20530-0.0 | Follow-up 1 |
| Diagnosed with life-threatening illness | 20528-0.0 | Follow-up 1 |
| Been involved in combat or exposed to warzone | 20527-0.0 | Follow-up 1 |
| Experienced a life-threatening injury or illness | 29087-0.0 | Follow-up 2 |
| Experienced a marital separation/divorce | 29088-0.0 | Follow-up 2 |
| Experienced a violent or sexual assault | 29086-0.0 | Follow-up 2 |
| Experienced the death of a close friend or family member due to suicide | 29090-0.0 | Follow-up 2 |
| Experienced the death of a spouse or partner | 29089-0.0 | Follow-up 2 |

**Table S2: List of general adverse factors in UKB dataset**

| **Categories** | **Data-Field** | **Adverse factors** | **Collection time** |
| --- | --- | --- | --- |
| **Eco-social factors** | 728-0.0 | Number of vehicles in household (R) | Baseline visit |
| 738-0.0 | Average total household income before tax (R) | Baseline visit |
| 680-0.0 | Own or rent accommodation lived in (R) | Baseline visit |
| 1031-0.0 | Frequency of friend/family visits (R) | Baseline visit |
| 2110-0.0 | Able to confide (R) | Baseline visit |
| 709-0.0 | Number in household (R) | Baseline visit |
| 2020-0.0 | Loneliness, isolation | Baseline visit |
| **Early-risk factors** | 1677-0.0 | Breastfed as a baby (R) | Baseline visit |
| 1687-0.0 | Comparative body size at age 10 (R) | Baseline visit |
| 1697-0.0 | Comparative height size at age 10 (R) | Baseline visit |
| 1787-0.0 | Maternal smoking around birth | Baseline visit |
| 20489-0.0 | Felt loved as a child (R) | Follow-up 1 |
| 20488-0.0 | Physically abused by family as a child | Follow-up 1 |
| 20487-0.0 | Felt hated by family member as a child | Follow-up 1 |
| 20490-0.0 | Sexually molested as a child | Follow-up 1 |
| 20491-0.0 | Someone to take to doctor when needed as a child (R) | Follow-up 1 |
| **Environmental factors** | 24014-0.0 | Close to major road | Baseline visit |
| 24012-0.0 | Inverse distance to the nearest major road | Baseline visit |
| 24010-0.0 | Inverse distance to the nearest road | Baseline visit |
| 24016-0.0 | Nitrogen dioxide air pollution; 2005 | Baseline visit |
| 24017-0.0 | Nitrogen dioxide air pollution; 2006 | Baseline visit |
| 24018-0.0 | Nitrogen dioxide air pollution; 2007 | Baseline visit |
| 24003-0.0 | Nitrogen dioxide air pollution; 2010 | Baseline visit |
| 24004-0.0 | Nitrogen oxides air pollution; 2010 | Baseline visit |
| 24019-0.0 | Particulate matter air pollution (pm10); 2007 | Baseline visit |
| 24005-0.0 | Particulate matter air pollution (pm10); 2010 | Baseline visit |
| 24007-0.0 | Particulate matter air pollution (pm2.5) absorbance; 2010 | Baseline visit |
| 24006-0.0 | Particulate matter air pollution (pm2.5); 2010 | Baseline visit |
| 24008-0.0 | Particulate matter air pollution 2.5-10um; 2010 | Baseline visit |
| 24015-0.0 | Sum of road length of major roads within 100m | Baseline visit |
| 24013-0.0 | Total traffic load on major roads | Baseline visit |
| 24011-0.0 | Traffic intensity on the nearest major road | Baseline visit |
| 24009-0.0 | Traffic intensity on the nearest road | Baseline visit |
| 24020-0.0 | Average daytime sound level of noise pollution | Baseline visit |
| 24021-0.0 | Average evening sound level of noise pollution | Baseline visit |
| 24022-0.0 | Average night-time sound level of noise pollution | Baseline visit |
| 24506-0.0 | Natural environment percentage, buffer 1000m (R) | Baseline visit |
| 24507-0.0 | Natural environment percentage, buffer 300m (R) | Baseline visit |
| 24500-0.0 | Greenspace percentage, buffer 1000m (R) | Baseline visit |
| 24503-0.0 | Greenspace percentage, buffer 300m (R) | Baseline visit |
| 24501-0.0 | Domestic garden percentage, buffer 1000m (R) | Baseline visit |
| 24504-0.0 | Domestic garden percentage, buffer 300m (R) | Baseline visit |
| 24502-0.0 | Water percentage, buffer 1000m (R) | Baseline visit |
| 24505-0.0 | Water percentage, buffer 300m (R) | Baseline visit |
| 24508-0.0 | Distance (Euclidean) to coast (R) | Baseline visit |

This table lists general adverse factors related to mental health outcomes in the UK Biobank dataset. Factors marked with “(R)” indicate a positive effect on mental health, for which reverse coding was applied to align with the directionality of adverse effects.

**Table S3: Definition of childhood adversity in the IMAGEN dataset**

| **Categories** | **Trauma events** | **IMAGEN label** | **Criteria** |
| --- | --- | --- | --- |
| **Family dysfunction (2+ indicators)** | Family money problem | leq_22_ever 'Family had money problems'. | 1 |
| Domestic violence | leq_24_ever 'Parents argued or fought'. | 1 |
| Parents’ alcohol abuse | leq_39_ever 'Parent abused alcohol'. | 1 |
| Harsh discipline | p1flq15 'Physical punishment (Parent1)'. OR p1flq16 'Non-physical punishment (Parent1)': Punished in other ways (e.g. things he likes are taken away, grounded, time out) | p1flq15 >=2 OR p1flq16 >=2 |
| Scapegoating | p1flq19 'Gets blamed unfairly (Parent1)' | p1flq19 >=2 |
| Parents gambling | p1fs16 'Family stresses: Gambling (Parent1)' | p1fs16 = 2 |
| Parents’ mental health | p1fs13 'Family stresses: Parents mental health (Parent1)' | p1fs13 =2 |
| Poor marital relations | p1fs10 'Family stresses: Tension with partner (Parent1)' OR p1fs11 'Family stresses: Tension with ex-partner (Parent1)'. | p1fs10 =2 OR p1fs11 =2 |
| Inadequate supervision | p1flq17 'Supervision (Parent1)'.An adult knows where he is, what he's doing, and who he's doing it with | p1flq17 = 0 |
| Parental overinvolvement | p1flq17 'Supervision (Parent1)'.An adult knows where he is, what he's doing, and who he's doing it with | p1flq17 = 3 |
| **Accident (1+ indicators)** | Family accident or illness | leq_02_ever 'Family accident or illness'. | 1 |
| Death in family | leq_08_ever 'Death in family'. | 1 |
| Serious accident or illness | leq_37_ever 'Serious accident or illness'. | 1 |
| **Unstable family structure (2+ indicators)** | Parents divorced' | leq_01_ever 'Parents divorced' | 1 |
| Parent remarried | leq_34_ever 'Parent remarried'. | 1 |
| Single parent family | p1parsit1 living with parents (1,2,3) means single family. | p1parsit1 <= 3 |
| Stepparent in household | p1parsit2c, p1parsit2g, p1parsit3c, p1parsit3g, 1 among these | p1parsit2c OR p1parsit2g OR p1parsit3c OR p1parsit3g = 1 |
| Living without parents | p1parsit1 living with parents (4) other arrangment | p1parsit1 = 4 |
| **Child maltreatment (1+ indicators)** | Physical abuse | CTQ_9, CTQ_11, CTQ_12, CTQ_15, CTQ_17 | >=10 |
| Physical neglect | CTQ_1, CTQ_2 (R), CTQ_4, CTQ_6, CTQ_26 (R) | >=10 |
| Sex abuse | CTQ_20, CTQ_21, CTQ_23, CTQ_24, CTQ_27 | >=8 |
| Emotional abuse | CTQ_3, CTQ_8, CTQ_14, CTQ_18, CTQ_25 | >=13 |
| Emotional neglect | CTQ_5 (R), CTQ_7 (R), CTQ_13 (R), CTQ_19 (R), CTQ_28 (R) | >=15 |
| **Peer victimization (1+ indicators)** | General bully | bully01 'I was bullied at school (a student/ peer said or did nasty or unpleasant things to me).' | bully01 >= 3 |
| Verbal bullying | bully02 'I was called mean names, was made fun of, or teased in a hurtful way by a student/ peer.' | bully02 >= 3 |
| Psychological bullying | bully03 'A student/ peer left me out of things on purpose, excluded me from their group of friends or completely ignored me.' | bully03 >= 3 |
| Physical bullying | bully04 'I was hit, kicked, pushed or shoved around, or locked indoors by a student/ peer.' | bully04 >= 3 |

This table details the definition of childhood adversity events in the IMAGEN database, derived from standardized questionnaire labels identifying individuals who experienced traumatic events. Events are categorized into five types: Family dysfunction, Accident, Unstable family structure, Child maltreatment, and Peer victimization. Criteria for each category are based on event frequency, as specified in the table.

**Table S4: List of psychosocial factors in resilience model in the UKB dataset**

| **Categories** | **Factors** | **Data-Field** | **Collection time** |
| --- | --- | --- | --- |
| Demographics | Sex | 31-0.0 | Baseline |
| Age | 21022-0.0 | Baseline |
| Education year | 6138-0.0 | Baseline |
| Economics | Household vehicle count | 728-0.0 | Baseline |
| Household income | 738-0.0 | Baseline |
| Rent accommodation lived in | 680-0.0 | Baseline |
| Housing Affordability | 20525-0.0 | Follow-up 1 |
| Financial difficulties | 6145-0.0 | Baseline |
| IMD | 26410-0.0/26427-0.0/26426-0.0 | Baseline |
| Family support | Number of people living in | 709-0.0 | Baseline |
| Confiding partner relationship | 20522-0.0 | Baseline |
| Belittling paternal relationship | 20521-0.0 | Baseline |
| Live with partner | 6164-0.0 | Baseline |
| Live with children | 6164-0.0 | Baseline |
| Live with siblings | 6164-0.0 | Baseline |
| Live with parents | 6164-0.0 | Baseline |
| Live with grandchild | 6164-0.0 | Baseline |
| Live with related | 6164-0.0 | Baseline |
| Live with unrelated | 6164-0.0 | Baseline |
| Live alone | 6164-0.0 | Baseline |
| Marital separation | 6145-0.0 | Baseline |
| Social support | Frequence of social visits | 1031-0.0 | Baseline |
| Confiding social relationship | 2110-0.0 | Baseline |
| Loneliness | 2020-0.0 | Baseline |
| Number of social activities | 6160-0.0 | Baseline |
| Early life | Breastfed as a baby | 1677-0.0 | Baseline |
| Comparative body size at age 10 | 1687-0.0 | Baseline |
| Comparative height at age 10 | 1697-0.0 | Baseline |
| Maternal smoking around birth | 1787-0.0 | Baseline |
| Childhood emotional neglect | 20489-0.0 | Follow-up 1 |
| Childhood physical abuse | 20488-0.0 | Follow-up 1 |
| Childhood emotional abuse | 20487-0.0 | Follow-up 1 |
| Childhood sexual molestation | 20490-0.0 | Follow-up 1 |
| Childhood physical neglect | 20491-0.0 | Follow-up 1 |
| Lifestyle | Moderate exercise time per week | 22038-0.0 | Baseline |
| Vigorous exercise time per week | 22039-0.0 | Baseline |
| Walking time per week | 22037-0.0 | Baseline |
| Chronotype: evening or morning person | 1180-0.0 | Baseline |
| TV time | 1070-0.0 | Baseline |
| Computer time | 1080-0.0 | Baseline |
| Personality | Big5-Agreeableness | —— | Baseline |
| Big5-Conscientiousness | —— | Baseline |
| Big5-Neuroticism | —— | Baseline |
| Big5-Extraversion | —— | Baseline |
| Big5-Openness | —— | Baseline |
| Subjective satisfaction | Health satisfaction | 4548-0.0 | Baseline |
| Family satisfaction | 4559-0.0 | Baseline |
| Friendships satisfaction | 4570-0.0 | Baseline |
| Financial satisfaction | 4581-0.0 | Baseline |

**Table S5: Definition of personality traits in the UKB dataset**

| **Personality proxy** | **Facets of Big Five Inventory** | **UK Biobank questions** | **Data-Field** |
| --- | --- | --- | --- |
| **Sociability** | **Extraversion** | Frequency of friend/family visit (> once a month) | 1031-0.0 |
| Guilty feelings (no) | 2030-0.0 |
| Frequency of tiredness/lethargy in last 2 weeks (not at all) | 2080-0.0 |
| Leisure/social activities | 6160-0.0 |
| **Warmth** | **Agreeableness** | Able to confide to (> once a month) | 2110-0.0 |
| Irritability (no) | 1940-0.0 |
| Mood swings (no) | 1920-0.0 |
| Tense / ’highly strung’ (no) | 1990-0.0 |
| Nervous feelings (no) | 1970-0.0 |
| **Diligence** | **Conscientiousness** | Frequency of enthusiasm/disinterest in last 2 weeks (not at all) | 2060-0.0 |
| Fed-up feelings (no) | 1960-0.0 |
| Risk taking (no) | 2040-0.0 |
| Worry too long after embarrassment (yes) | 2000-0.0 |
| **Curiosity** | **Openness** | Loneliness, isolation (no) | 2020-0.0 |
| Suffer from ’nerves’ (no) | 2010-0.0 |
| Frequency of tenseness/restlessness in last 2 weeks (> several days) | 2070-0.0 |
| Risk taking (yes) | 2040-0.0 |
| **Nervousness** | **Neuroticism** | Tense / ’highly strung’ (yes) | 1990-0.0 |
| Irritability (yes) | 1940-0.0 |
| Frequency of enthusiasm/disinterest in last 2 weeks (> several days) | 2060-0.0 |
| Mood swings (yes) | 1920-0.0 |
| Sensitivity/hurt feelings (yes) | 1950-0.0 |

Each question account for one point in generating the score of personality traits.

**Table S6: List of psychosocial factors in resilience model in the IMAGEN dataset**

| **Category** | **UKB name** | **IMAGEN label** | **Collection time** |
| --- | --- | --- | --- |
| **Democratic** | Sex | Sex | Baseline |
| **Eco** | Household income | p1fsses 'Family stresses: Socioeconomic/housing score (Parent1)' | Baseline |
| **Family support** | Confiding partner relationship | p1flq13 'Gets help and support when stressed (Parent1) | Baseline |
| **Social support** | Confiding social relationship | sfriend 'SDQ: Has good friend (Youth) | Baseline |
| **Lifestyle** | Moderate exercise time per week | sn2a '+ve: Good at sport (Youth)' | Baseline |
| **Personality** | Big5_warmth | C.agre_sum 'CHILD Agreeableness total' | Baseline |
| Big5_diligence | C.cons_sum 'CHILD Conscientiousness total' | Baseline |
| Big5_nervousness | C.neur_sum 'CHILD Neuroticism total' | Baseline |
| Big5_sociability | C.extr_sum 'CHILD Extraversion total' | Baseline |
| Big5_curiosity | C.open_sum 'CHILD Openness total' | Baseline |
| **Satisfaction** | Family satisfaction | CTQ_22: I had the best family in the world. | Follow-up 2 |
| Friendships satisfaction | sn2b '+ve: Good with friends (Youth)' | Baseline |

**Table S7: List of blood parameter in the UKB dataset**

| **Blood parameter name** | **Data-Field** | **Bio_name_short** | **function** |
| --- | --- | --- | --- |
| Alkaline phosphatase | 30610-0.0 | ALP | Bone and joint |
| Calcium | 30680-0.0 | Calcium | Bone and joint |
| Rheumatoid factor | 30820-0.0 | RF | Bone and joint |
| Vitamin D | 30890-0.0 | Vitamin_D | Bone and joint |
| IGF-1 | 30770-0.0 | IGF_1 | Endocrine |
| Oestradiol | 30800-0.0 | Estradiol | Endocrine |
| SHBG | 30830-0.0 | SHBG | Endocrine |
| Testosterone | 30850-0.0 | Testosterone | Endocrine |
| Apolipoprotein A | 30630-0.0 | Apo_A | Immunometabolic |
| Apolipoprotein B | 30640-0.0 | Apo_B | Immunometabolic |
| C-reactive protein | 30710-0.0 | CRP | Immunometabolic |
| Cholesterol | 30690-0.0 | Cholesterol | Immunometabolic |
| Glucose | 30740-0.0 | Glucose | Immunometabolic |
| Glycated haemoglobin (HbA1c) | 30750-0.0 | HbA1c | Immunometabolic |
| HDL cholesterol | 30760-0.0 | HDL_C | Immunometabolic |
| LDL direct | 30780-0.0 | LDL_C | Immunometabolic |
| Lipoprotein A | 30790-0.0 | Lp(a) | Immunometabolic |
| Triglycerides | 30870-0.0 | TG | Immunometabolic |
| Alanine aminotransferase | 30620-0.0 | ALT | Liver function |
| Albumin | 30600-0.0 | Albumin | Liver function |
| Aspartate aminotransferase | 30650-0.0 | AST | Liver function |
| Direct bilirubin | 30660-0.0 | Direct_Bili | Liver function |
| Gamma glutamyl transferase | 30730-0.0 | GGT | Liver function |
| Total bilirubin | 30840-0.0 | Total_Bili | Liver function |
| Mean platelet (thrombocyte) volume | 30100-0.0 | MPV | Platelet |
| Platelet count | 30080-0.0 | Platelet_Count | Platelet |
| Platelet crit | 30090-0.0 | PCT | Platelet |
| Platelet distribution width | 30110-0.0 | PDW | Platelet |
| Haematocrit percentage | 30030-0.0 | HCT | Red blood cell |
| Haemoglobin concentration | 30020-0.0 | HGB | Red blood cell |
| High light scatter reticulocyte count | 30300-0.0 | HLSR_Count | Red blood cell |
| High light scatter reticulocyte percentage | 30290-0.0 | HLSR_Percentage | Red blood cell |
| Immature reticulocyte fraction | 30280-0.0 | IRF | Red blood cell |
| Mean corpuscular haemoglobin | 30050-0.0 | MCH | Red blood cell |
| Mean corpuscular haemoglobin concentration | 30060-0.0 | MCHC | Red blood cell |
| Mean corpuscular volume | 30040-0.0 | MCV | Red blood cell |
| Mean reticulocyte volume | 30260-0.0 | MRV | Red blood cell |
| Mean sphered cell volume | 30270-0.0 | MSCV | Red blood cell |
| Nucleated red blood cell count | 30170-0.0 | NRBC_Count | Red blood cell |
| Nucleated red blood cell percentage | 30230-0.0 | NRBC_Percentage | Red blood cell |
| Red blood cell (erythrocyte) count | 30010-0.0 | RBC_Count | Red blood cell |
| Red blood cell (erythrocyte) distribution width | 30070-0.0 | RDW | Red blood cell |
| Reticulocyte count | 30250-0.0 | Retic_Count | Red blood cell |
| Reticulocyte percentage | 30240-0.0 | Retic_Percentage | Red blood cell |
| Creatinine | 30700-0.0 | Creatinine | Renal function |
| Cystatin C | 30720-0.0 | Cystatin_C | Renal function |
| Phosphate | 30810-0.0 | Phosphate | Renal function |
| Total protein | 30860-0.0 | Total_Protein | Renal function |
| Urate | 30880-0.0 | Uric_Acid | Renal function |
| Urea | 30670-0.0 | Urea | Renal function |
| Basophill count | 30160-0.0 | Baso_Count | White blood cell |
| Basophill percentage | 30220-0.0 | Baso_Percentage | White blood cell |
| Eosinophill count | 30150-0.0 | Eos_Count | White blood cell |
| Eosinophill percentage | 30210-0.0 | Eos_Percentage | White blood cell |
| Lymphocyte count | 30120-0.0 | Lymph_Count | White blood cell |
| Lymphocyte percentage | 30180-0.0 | Lymph_Percentage | White blood cell |
| Monocyte count | 30130-0.0 | Mono_Count | White blood cell |
| Monocyte percentage | 30190-0.0 | Mono_Percentage | White blood cell |
| Neutrophill count | 30140-0.0 | Neut_Count | White blood cell |
| Neutrophill percentage | 30200-0.0 | Neut_Percentage | White blood cell |
| White blood cell (leukocyte) count | 30000-0.0 | WBC_Count | White blood cell |

**Table S8: Characteristic of individuals grouped by Brief Resilience Scale scores in the UKB dataset**

| **Characteristic** | **Overall, N = 164,929** | **Vulnerable, N = 62,793** | **Moderate, N = 38,395** | **Resilient, N = 63,741** | **p-value** |
| --- | --- | --- | --- | --- | --- |
| Sex |  |  |  |  | <0.001 |
| Female | 95,195 (58%) | 41,211 (66%) | 21,826 (57%) | 32,158 (50%) |  |
| Male | 69,734 (42%) | 21,582 (34%) | 16,569 (43%) | 31,583 (50%) |  |
| Age | 55 (8) | 55 (8) | 56 (8) | 56 (7) | <0.001 |
| Ethnic |  |  |  |  | <0.001 |
| 1_White | 160,347 (97%) | 61,105 (97%) | 37,305 (97%) | 61,937 (97%) |  |
| 2_Asian | 1,773 (1.1%) | 670 (1.1%) | 406 (1.1%) | 697 (1.1%) |  |
| 3_Black | 1,086 (0.7%) | 338 (0.5%) | 258 (0.7%) | 490 (0.8%) |  |
| 4_Other | 1,723 (1.0%) | 680 (1.1%) | 426 (1.1%) | 617 (1.0%) |  |
| Education | 16.4 (4.4) | 16.4 (4.4) | 16.5 (4.4) | 16.4 (4.5) | <0.001 |
| BMI | 26.7 (4.5) | 26.6 (4.7) | 26.7 (4.4) | 26.9 (4.4) | <0.001 |

Continuous variables are reported as mean (standard deviation, SD), and categorical variables are reported as number (percentage, %). Statistical comparisons across groups were performed using the Kruskal-Wallis rank sum test for continuous variables and Pearson’s Chi-squared test for categorical variables.

**Table S9: Differences in trauma-affective symptom associations between resilient and vulnerable groups by sex**

|  | **Baseline** | | **Follow-up 1** | | **Follow-up 2** | |
| --- | --- | --- | --- | --- | --- | --- |
| **Sex** | **z value** | **p-value** | **z value** | **p-value** | **z value** | **p-value** |
| Female | -2.3036562 | 2.12E-02 | -2.5116646 | 1.20E-02 | -3.344905 | 8.23E-04 |
| Male | -3.2680986 | 1.08E-03 | -0.4635662 | 6.43E-01 | -4.490574 | 7.10E-06 |

Table presents differences in associations between trauma exposure and affective symptoms between resilient and vulnerable groups, stratified by sex (male and female), across multiple stages. The cocor test was used to compare correlation coefficients of trauma-affective symptom associations across groups. Results include z values (indicating differences in correlation coefficients) and p-values, as detailed in the table.

**Table S10: Sensitivity analyses of affective disorder symptoms at baseline with resilience-trauma interaction**

| **Term** | **Estimate** | **Std.error** | **Statistic** | **p-value** | **Conf_int[2.5 %]** | **Conf_int[97.5 %]** |
| --- | --- | --- | --- | --- | --- | --- |
| (Intercept) | 4.45661853 | 0.0661890667 | 67.3316418 | 0.000000e+00 | 4.32688865 | 4.586348416 |
| Resilience | -0.64357794 | 0.0091491881 | -70.3426285 | 0.000000e+00 | -0.66151026 | -0.625645628 |
| Trauma exposure | 0.90666887 | 0.0339734511 | 26.6875706 | 2.576713e-156 | 0.84008126 | 0.973256486 |
| Age | -0.03108977 | 0.0007230554 | -42.9977722 | 0.000000e+00 | -0.03250695 | -0.029672589 |
| Sex(Male) | -0.06218302 | 0.0109817710 | -5.6623850 | 1.497243e-08 | -0.08370717 | -0.040658859 |
| Ethnic(Asian) | 0.24920805 | 0.0586894211 | 4.2462176 | 2.176214e-05 | 0.13417740 | 0.364238709 |
| Ethnic(Black) | 0.04514764 | 0.0754000620 | 0.5987745 | 5.493247e-01 | -0.10263570 | 0.192930976 |
| Ethnic(Other) | 0.42280598 | 0.0807801492 | 5.2340331 | 1.662116e-07 | 0.26447772 | 0.581134234 |
| BMI | 0.03502934 | 0.0012150694 | 28.8290851 | 5.955542e-182 | 0.03264782 | 0.037410864 |
| Education | -0.01112628 | 0.0012744371 | -8.7303501 | 2.580066e-18 | -0.01362417 | -0.008628399 |
| Resilience:Trauma exposure | -0.15760775 | 0.0092481626 | -17.0420606 | 5.034388e-65 | -0.17573405 | -0.139481444 |

Table presents linear regression results from sensitivity analyses examining affective disorder symptoms at baseline, using continuous resilience scores. Independent variables include resilience, trauma exposure, and covariates. The interaction between resilience and trauma exposure reflects the protective role of resilience on mental health. Results include beta coefficients, t values, and p-values for each variable, as detailed in the table.

**Table S11: Sensitivity analyses of affective disorder symptoms at follow-up 1 with resilience-trauma interaction**

| **Term** | **Estimate** | **Std.error** | **Statistic** | **p-value** | **Conf_int[2.5 %]** | **Conf_int[97.5 %]** |
| --- | --- | --- | --- | --- | --- | --- |
| (Intercept) | 0.840717134 | 0.0087530160 | 96.0488519 | 0.000000e+00 | 0.823561313 | 0.857872954 |
| Resilience | -0.121820400 | 0.0010333847 | -117.8848554 | 0.000000e+00 | -0.123845823 | -0.119794977 |
| Trauma exposure | 0.213721347 | 0.0201829753 | 10.5891894 | 3.462367e-26 | 0.174162925 | 0.253279769 |
| Age | -0.004889002 | 0.0001001411 | -48.8211487 | 0.000000e+00 | -0.005085278 | -0.004692727 |
| Sex(Male) | -0.025149321 | 0.0015265659 | -16.4744416 | 6.841368e-61 | -0.028141375 | -0.022157268 |
| Ethnic(Asian) | 0.025840030 | 0.0081606915 | 3.1664021 | 1.543874e-03 | 0.009845160 | 0.041834901 |
| Ethnic(Black) | -0.008913760 | 0.0104818265 | -0.8504014 | 3.951041e-01 | -0.029458032 | 0.011630511 |
| Ethnic(Other) | 0.038230257 | 0.0112313294 | 3.4038942 | 6.646064e-04 | 0.016216968 | 0.060243546 |
| BMI | 0.005232303 | 0.0001683961 | 31.0714013 | 7.194062e-211 | 0.004902248 | 0.005562358 |
| Education | -0.002356136 | 0.0001772103 | -13.2957026 | 2.669906e-40 | -0.002703466 | -0.002008805 |
| Resilience:Trauma exposure | -0.041298614 | 0.0054665656 | -7.5547641 | 4.234583e-14 | -0.052013025 | -0.030584202 |

Table presents linear regression results from sensitivity analyses examining affective disorder symptoms at follow-up 1, using continuous resilience scores. Independent variables include resilience, trauma exposure, and covariates. The interaction between resilience and trauma exposure reflects the protective role of resilience on mental health. Results include beta coefficients, t values, and p-values for each variable, as detailed in the table.

**Table S12: Sensitivity analyses of affective disorder symptoms at follow-up 2 with resilience-trauma interaction**

| **Term** | **Estimate** | **Std.error** | **Statistic** | **p-value** | **Conf_int[2.5 %]** | **Conf_int[97.5 %]** |
| --- | --- | --- | --- | --- | --- | --- |
| (Intercept) | 0.812622139 | 0.0084645449 | 96.0030517 | 0.000000e+00 | 0.796031719 | 0.829212559 |
| Resilience | -0.150062279 | 0.0010189733 | -147.2681188 | 0.000000e+00 | -0.152059456 | -0.148065102 |
| Trauma exposure | 0.304304962 | 0.0101265151 | 30.0503144 | 1.941283e-197 | 0.284457098 | 0.324152827 |
| Age | -0.003330844 | 0.0000963902 | -34.5558364 | 5.351433e-260 | -0.003519768 | -0.003141920 |
| Sex(Male) | -0.023399449 | 0.0014689570 | -15.9292949 | 4.727251e-57 | -0.026278589 | -0.020520308 |
| Ethnic(Asian) | -0.002569087 | 0.0078545901 | -0.3270810 | 7.436074e-01 | -0.017964002 | 0.012825828 |
| Ethnic(Black) | -0.015536861 | 0.0100891889 | -1.5399514 | 1.235756e-01 | -0.035311566 | 0.004237845 |
| Ethnic(Other) | 0.009839956 | 0.0108102285 | 0.9102449 | 3.626957e-01 | -0.011347980 | 0.031027891 |
| BMI | 0.005110470 | 0.0001621468 | 31.5175549 | 7.091017e-217 | 0.004792664 | 0.005428276 |
| Education | -0.002037722 | 0.0001705678 | -11.9466998 | 7.142922e-33 | -0.002372033 | -0.001703411 |
| Resilience:Trauma exposure | -0.057871323 | 0.0028390612 | -20.3839647 | 3.703757e-92 | -0.063435853 | -0.052306792 |

Table presents linear regression results from sensitivity analyses examining affective disorder symptoms at follow-up 2, using continuous resilience scores. Independent variables include resilience, trauma exposure, and covariates. The interaction between resilience and trauma exposure reflects the protective role of resilience on mental health. Results include beta coefficients, t values, and p-values for each variable, as detailed in the table.

**Table S13: Linear regression analyses of affective symptoms at baseline with interactions between resilience and general adverse factors**

| **General adverse factors** | **Estimate** | **Std.error** | **Statistic** | **p-value** | **pfdr** |
| --- | --- | --- | --- | --- | --- |
| HH_Num_Vehicle_BL | 1.484323e-01 | 5.522687e-03 | 26.8768207 | 9.586358e-159 | 6.162658e-158 |
| HH_Income_BL | 1.956523e-01 | 4.546752e-03 | 43.0312164 | 0.000000e+00 | 0.000000e+00 |
| HH_Own_Rent_BL | 1.754967e-01 | 6.576022e-03 | 26.6873715 | 1.512529e-156 | 8.507974e-156 |
| Social_Freq_Visits_BL | 8.801642e-02 | 4.316683e-03 | 20.3898295 | 2.729659e-92 | 1.116679e-91 |
| Social_Able_Confide_BL | 1.818842e-01 | 2.582889e-03 | 70.4188948 | 0.000000e+00 | 0.000000e+00 |
| Num_People_Living_BL | 5.659334e-02 | 4.067313e-03 | 13.9141822 | 5.525105e-44 | 1.657532e-43 |
| Loneliness_BL | 1.971902e+00 | 1.206712e-02 | 163.4111511 | 0.000000e+00 | 0.000000e+00 |
| Breastfed_Baby_BL | 5.998924e-02 | 1.185501e-02 | 5.0602434 | 4.193162e-07 | 6.739010e-07 |
| Comp_Body_Size_Age_10_BL | 6.275802e-02 | 7.088187e-03 | 8.8538886 | 8.539999e-19 | 1.478077e-18 |
| Comp_Height_Size_Age_10_BL | 9.548220e-03 | 6.761508e-03 | 1.4121437 | 1.579097e-01 | 1.775940e-01 |
| Maternal_Smoking_Birth_BL | 1.603997e-01 | 1.094940e-02 | 14.6491831 | 1.485654e-48 | 5.142648e-48 |
| Felt_Loved_As_Child_FU1 | 2.949303e-01 | 5.696762e-03 | 51.7715558 | 0.000000e+00 | 0.000000e+00 |
| Phys_Abused_As_Child_FU1 | 2.464399e-01 | 8.344277e-03 | 29.5339979 | 6.790987e-191 | 5.093240e-190 |
| Felt_Hated_As_Child_FU1 | 3.784450e-01 | 7.350627e-03 | 51.4847276 | 0.000000e+00 | 0.000000e+00 |
| Sex_Molested_As_Child_FU1 | 2.565470e-01 | 1.089084e-02 | 23.5562118 | 2.324311e-122 | 1.162155e-121 |
| Someone_Take_To_Doctor_As_Child_FU1 | 1.670029e-01 | 8.104708e-03 | 20.6056694 | 3.810497e-94 | 1.714724e-93 |
| NO2_Air_Pollution_2010_BL | 8.608221e-03 | 6.134592e-04 | 14.0322633 | 1.055389e-44 | 3.392321e-44 |
| NOx_Air_Pollution_2010_BL | 4.075110e-03 | 3.059214e-04 | 13.3207774 | 1.847156e-40 | 5.195125e-40 |
| PM10_Air_Pollution_2010_BL | 2.049729e-02 | 2.524124e-03 | 8.1205540 | 4.677483e-16 | 7.795805e-16 |
| PM2.5_Air_Pollution_2010_BL | 6.964955e-02 | 4.630084e-03 | 15.0428274 | 4.215027e-51 | 1.580635e-50 |
| PM2.5_Absorbance_2010_BL | 1.691834e-01 | 1.791438e-02 | 9.4440007 | 3.640043e-21 | 6.552078e-21 |
| PM2.5_10um_Air_Pollution_2010_BL | 1.627583e-02 | 5.407850e-03 | 3.0096678 | 2.615796e-03 | 3.797123e-03 |
| Traffic_Intensity_Nearest_Road_BL | -2.208526e-07 | 9.744498e-07 | -0.2266434 | 8.207013e-01 | 8.393536e-01 |
| Inv_Dist_Nearest_Road_BL | 1.348845e-01 | 6.246813e-02 | 2.1592538 | 3.083204e-02 | 3.749843e-02 |
| Traffic_Intensity_Nearest_Major_Road_BL | 2.576731e-07 | 2.240187e-07 | 1.1502301 | 2.500509e-01 | 2.679117e-01 |
| Inv_Dist_Nearest_Major_Road_BL | 7.367863e-01 | 2.985943e-01 | 2.4675168 | 1.360648e-02 | 1.749405e-02 |
| Total_Traffic_Load_Major_Roads_BL | 1.044967e-08 | 4.311390e-09 | 2.4237350 | 1.536297e-02 | 1.920372e-02 |
| Close_To_Major_Road_BL | 1.843658e-02 | 1.854063e-02 | 0.9943876 | 3.200358e-01 | 3.349212e-01 |
| Sum_Major_Road_Length_100m_BL | 2.127199e-04 | 6.272072e-05 | 3.3915420 | 6.951825e-04 | 1.078731e-03 |
| NO2_Air_Pollution_2005_BL | 5.067630e-03 | 4.525328e-04 | 11.1983710 | 4.263818e-29 | 9.593590e-29 |
| NO2_Air_Pollution_2006_BL | 5.703456e-03 | 4.986240e-04 | 11.4383907 | 2.766380e-30 | 6.551953e-30 |
| NO2_Air_Pollution_2007_BL | 4.275249e-03 | 4.265373e-04 | 10.0231520 | 1.226582e-23 | 2.399834e-23 |
| PM10_Air_Pollution_2007_BL | 1.571660e-02 | 1.598483e-03 | 9.8321975 | 8.311319e-23 | 1.558372e-22 |
| Avg_Daytime_Sound_Level_BL | 3.109144e-03 | 1.106514e-03 | 2.8098559 | 4.957004e-03 | 6.594026e-03 |
| Avg_Evening_Sound_Level_BL | 3.107336e-03 | 1.106512e-03 | 2.8082266 | 4.982153e-03 | 6.594026e-03 |
| Avg_Nighttime_Sound_Level_BL | 3.108868e-03 | 1.106519e-03 | 2.8095917 | 4.961074e-03 | 6.594026e-03 |
| Greenspace_Percentage_1000m_BL | 2.678517e-03 | 2.190996e-04 | 12.2251117 | 2.379779e-34 | 5.949447e-34 |
| Domestic_Garden_Percentage_1000m_BL | 8.246344e-04 | 4.205906e-04 | 1.9606581 | 4.992097e-02 | 5.911694e-02 |
| Water_Percentage_1000m_BL | 2.685817e-03 | 1.919778e-03 | 1.3990247 | 1.618079e-01 | 1.775940e-01 |
| Greenspace_Percentage_300m_BL | 2.073148e-03 | 2.020811e-04 | 10.2589920 | 1.100902e-24 | 2.251844e-24 |
| Domestic_Garden_Percentage_300m_BL | 5.122001e-04 | 3.230683e-04 | 1.5854238 | 1.128724e-01 | 1.302374e-01 |
| Water_Percentage_300m_BL | 4.867256e-03 | 1.576922e-03 | 3.0865554 | 2.025310e-03 | 3.037965e-03 |
| Natural_Env_Percentage_1000m_BL | 2.293344e-03 | 1.764911e-04 | 12.9941027 | 1.385501e-38 | 3.667504e-38 |
| Natural_Env_Percentage_300m_BL | 1.919774e-03 | 1.775463e-04 | 10.8128095 | 3.062638e-27 | 6.562797e-27 |
| Distance_To_Coast_Euclidean_BL | -3.363587e-05 | 1.679376e-04 | -0.2002879 | 8.412557e-01 | 8.412557e-01 |

This table presents linear regression results from sensitivity analyses examining affective symptoms (PHQ-4 scores) at baseline, using continuous resilience scores. Each regression includes one of 45 general adverse factors, resilience, and covariates as independent variables. The interaction between each adverse factor and resilience reflects the mitigating effect of resilience on the impact of adverse factors on mental health. Results include beta coefficients, t values, p-values, and FDR-corrected p-values for each interaction, as detailed in the table.

**Table S14: Linear regression analyses of affective symptoms at follow-up 1 with interactions between resilience and general adverse factors**

| **General adverse factors** | **Estimate** | **Std.error** | **Statistic** | **p-value** | **pfdr** |
| --- | --- | --- | --- | --- | --- |
| HH_Num_Vehicle_BL | 1.700860e-02 | 9.252369e-04 | 18.38296704 | 2.358092e-75 | 1.061141e-74 |
| HH_Income_BL | 2.386510e-02 | 7.560842e-04 | 31.56407493 | 1.460827e-217 | 9.391028e-217 |
| HH_Own_Rent_BL | 2.121169e-02 | 1.097746e-03 | 19.32295101 | 4.799747e-83 | 2.399873e-82 |
| Social_Freq_Visits_BL | 6.870241e-03 | 7.179426e-04 | 9.56934540 | 1.097831e-21 | 3.528742e-21 |
| Social_Able_Confide_BL | 1.915048e-02 | 4.343894e-04 | 44.08598846 | 0.000000e+00 | 0.000000e+00 |
| Num_People_Living_BL | 6.215100e-03 | 6.773259e-04 | 9.17593687 | 4.553992e-20 | 1.205469e-19 |
| Loneliness_BL | 1.835752e-01 | 2.109555e-03 | 87.02078527 | 0.000000e+00 | 0.000000e+00 |
| Breastfed_Baby_BL | 1.529860e-02 | 1.989213e-03 | 7.69077870 | 1.477889e-14 | 2.771042e-14 |
| Comp_Body_Size_Age_10_BL | 6.796954e-03 | 1.183223e-03 | 5.74443895 | 9.248029e-09 | 1.541338e-08 |
| Comp_Height_Size_Age_10_BL | 8.014843e-04 | 1.124161e-03 | 0.71296247 | 4.758706e-01 | 5.098613e-01 |
| Maternal_Smoking_Birth_BL | 2.200385e-02 | 1.837673e-03 | 11.97375753 | 5.157268e-33 | 2.109791e-32 |
| Felt_Loved_As_Child_FU1 | 5.317330e-02 | 7.804846e-04 | 68.12857418 | 0.000000e+00 | 0.000000e+00 |
| Phys_Abused_As_Child_FU1 | 4.701133e-02 | 1.147466e-03 | 40.96969922 | 0.000000e+00 | 0.000000e+00 |
| Felt_Hated_As_Child_FU1 | 6.872151e-02 | 1.005812e-03 | 68.32438100 | 0.000000e+00 | 0.000000e+00 |
| Sex_Molested_As_Child_FU1 | 4.875457e-02 | 1.503093e-03 | 32.43615542 | 1.169268e-229 | 8.769511e-229 |
| Someone_Take_To_Doctor_As_Child_FU1 | 3.194575e-02 | 1.113487e-03 | 28.68983635 | 2.530770e-180 | 1.423558e-179 |
| NO2_Air_Pollution_2010_BL | 1.001311e-03 | 1.011342e-04 | 9.90081590 | 4.226986e-23 | 1.463187e-22 |
| NOx_Air_Pollution_2010_BL | 4.799468e-04 | 5.057014e-05 | 9.49071648 | 2.340526e-21 | 7.021579e-21 |
| PM10_Air_Pollution_2010_BL | 2.296995e-03 | 4.191215e-04 | 5.48050017 | 4.251723e-08 | 6.833127e-08 |
| PM2.5_Air_Pollution_2010_BL | 7.937013e-03 | 7.686789e-04 | 10.32552524 | 5.565003e-25 | 2.086876e-24 |
| PM2.5_Absorbance_2010_BL | 2.377095e-02 | 2.938721e-03 | 8.08887362 | 6.090405e-16 | 1.305087e-15 |
| PM2.5_10um_Air_Pollution_2010_BL | 2.496106e-03 | 9.008808e-04 | 2.77073927 | 5.593979e-03 | 7.192258e-03 |
| Traffic_Intensity_Nearest_Road_BL | 1.577158e-08 | 1.593814e-07 | 0.09895497 | 9.211742e-01 | 9.211742e-01 |
| Inv_Dist_Nearest_Road_BL | 3.514518e-02 | 1.042648e-02 | 3.37076240 | 7.498764e-04 | 1.022559e-03 |
| Traffic_Intensity_Nearest_Major_Road_BL | 3.588602e-08 | 3.732330e-08 | 0.96149099 | 3.363076e-01 | 3.691181e-01 |
| Inv_Dist_Nearest_Major_Road_BL | 1.184640e-01 | 4.988469e-02 | 2.37475635 | 1.756233e-02 | 2.195292e-02 |
| Total_Traffic_Load_Major_Roads_BL | 2.191209e-09 | 7.176889e-10 | 3.05314551 | 2.265131e-03 | 2.997967e-03 |
| Close_To_Major_Road_BL | 5.572270e-03 | 3.105382e-03 | 1.79439110 | 7.275366e-02 | 8.615565e-02 |
| Sum_Major_Road_Length_100m_BL | 3.591856e-05 | 1.051600e-05 | 3.41560907 | 6.366376e-04 | 8.952716e-04 |
| NO2_Air_Pollution_2005_BL | 6.712243e-04 | 7.365241e-05 | 9.11340563 | 8.119725e-20 | 1.923093e-19 |
| NO2_Air_Pollution_2006_BL | 7.479617e-04 | 8.131047e-05 | 9.19883635 | 3.682521e-20 | 1.035709e-19 |
| NO2_Air_Pollution_2007_BL | 5.584576e-04 | 6.930778e-05 | 8.05764725 | 7.859018e-16 | 1.537634e-15 |
| PM10_Air_Pollution_2007_BL | 2.112662e-03 | 2.615827e-04 | 8.07645871 | 6.738004e-16 | 1.378228e-15 |
| Avg_Daytime_Sound_Level_BL | 6.474679e-04 | 1.844431e-04 | 3.51039339 | 4.476328e-04 | 6.505367e-04 |
| Avg_Evening_Sound_Level_BL | 6.474090e-04 | 1.844424e-04 | 3.51008777 | 4.481475e-04 | 6.505367e-04 |
| Avg_Nighttime_Sound_Level_BL | 6.474794e-04 | 1.844439e-04 | 3.51043997 | 4.475543e-04 | 6.505367e-04 |
| Greenspace_Percentage_1000m_BL | 2.956902e-04 | 3.627679e-05 | 8.15094827 | 3.654805e-16 | 8.223312e-16 |
| Domestic_Garden_Percentage_1000m_BL | 3.628847e-05 | 6.978677e-05 | 0.51999068 | 6.030713e-01 | 6.167775e-01 |
| Water_Percentage_1000m_BL | 3.258231e-04 | 3.248084e-04 | 1.00312395 | 3.158036e-01 | 3.552791e-01 |
| Greenspace_Percentage_300m_BL | 2.162371e-04 | 3.347977e-05 | 6.45873838 | 1.060934e-10 | 1.836232e-10 |
| Domestic_Garden_Percentage_300m_BL | 1.140395e-04 | 5.352477e-05 | 2.13059331 | 3.312525e-02 | 4.028747e-02 |
| Water_Percentage_300m_BL | 4.346673e-04 | 2.660550e-04 | 1.63374997 | 1.023147e-01 | 1.180554e-01 |
| Natural_Env_Percentage_1000m_BL | 2.675997e-04 | 2.927206e-05 | 9.14181478 | 6.246733e-20 | 1.561683e-19 |
| Natural_Env_Percentage_300m_BL | 2.169458e-04 | 2.949406e-05 | 7.35557836 | 1.914808e-13 | 3.446654e-13 |
| Distance_To_Coast_Euclidean_BL | 1.670463e-05 | 2.811015e-05 | 0.59425604 | 5.523422e-01 | 5.780325e-01 |

This table presents linear regression results from sensitivity analyses examining affective symptoms (combined PHQ-9 and GAD-7 scores) at follow-up 1, using continuous resilience scores. Each regression includes one of 45 general adverse factors, resilience, and covariates as independent variables. The interaction between each adverse factor and resilience reflects the mitigating effect of resilience on mental health. Results include beta coefficients, t values, p-values, and FDR-corrected p-values for each interaction, as detailed in the table.

**Table S15: Linear regression analyses of affective symptoms at follow-up 2 with interactions between resilience and general adverse factors**

| **General adverse factors** | **Estimate** | **Std.error** | **Statistic** | **p-value** | **pfdr** |
| --- | --- | --- | --- | --- | --- |
| HH_Num_Vehicle_BL | 2.057850e-02 | 7.812807e-04 | 26.33944859 | 1.440636e-152 | 8.103577e-152 |
| HH_Income_BL | 2.856270e-02 | 6.454406e-04 | 44.25302275 | 0.000000e+00 | 0.000000e+00 |
| HH_Own_Rent_BL | 2.078108e-02 | 9.312517e-04 | 22.31521630 | 3.887828e-110 | 1.749522e-109 |
| Social_Freq_Visits_BL | 4.145563e-03 | 6.129429e-04 | 6.76337550 | 1.352747e-11 | 2.174057e-11 |
| Social_Able_Confide_BL | 1.785895e-02 | 3.692875e-04 | 48.36057694 | 0.000000e+00 | 0.000000e+00 |
| Num_People_Living_BL | 8.669280e-03 | 5.768624e-04 | 15.02833166 | 5.190459e-51 | 2.123370e-50 |
| Loneliness_BL | 1.863150e-01 | 1.789210e-03 | 104.13252104 | 0.000000e+00 | 0.000000e+00 |
| Breastfed_Baby_BL | 1.532790e-02 | 1.678462e-03 | 9.13210998 | 6.810877e-20 | 1.332563e-19 |
| Comp_Body_Size_Age_10_BL | 9.307748e-03 | 1.006032e-03 | 9.25194089 | 2.230780e-20 | 4.562960e-20 |
| Comp_Height_Size_Age_10_BL | 2.296093e-03 | 9.602194e-04 | 2.39121692 | 1.679379e-02 | 2.042488e-02 |
| Maternal_Smoking_Birth_BL | 1.950542e-02 | 1.553319e-03 | 12.55725710 | 3.793109e-36 | 1.312999e-35 |
| Felt_Loved_As_Child_FU1 | 4.926725e-02 | 8.022839e-04 | 61.40874163 | 0.000000e+00 | 0.000000e+00 |
| Phys_Abused_As_Child_FU1 | 4.613729e-02 | 1.175657e-03 | 39.24384729 | 0.000000e+00 | 0.000000e+00 |
| Felt_Hated_As_Child_FU1 | 6.580092e-02 | 1.035248e-03 | 63.56053991 | 0.000000e+00 | 0.000000e+00 |
| Sex_Molested_As_Child_FU1 | 4.508796e-02 | 1.542848e-03 | 29.22384784 | 5.481244e-187 | 3.523657e-186 |
| Someone_Take_To_Doctor_As_Child_FU1 | 2.919336e-02 | 1.143028e-03 | 25.54037821 | 1.928753e-143 | 9.643763e-143 |
| NO2_Air_Pollution_2010_BL | 1.055979e-03 | 8.698497e-05 | 12.13979231 | 6.729801e-34 | 2.018940e-33 |
| NOx_Air_Pollution_2010_BL | 5.334343e-04 | 4.333375e-05 | 12.30990316 | 8.312821e-35 | 2.671978e-34 |
| PM10_Air_Pollution_2010_BL | 2.502351e-03 | 3.577332e-04 | 6.99502039 | 2.663445e-12 | 4.439074e-12 |
| PM2.5_Air_Pollution_2010_BL | 8.567624e-03 | 6.561302e-04 | 13.05781099 | 6.028837e-39 | 2.260814e-38 |
| PM2.5_Absorbance_2010_BL | 2.164782e-02 | 2.538277e-03 | 8.52855048 | 1.495665e-17 | 2.739320e-17 |
| PM2.5_10um_Air_Pollution_2010_BL | 2.213020e-03 | 7.652980e-04 | 2.89171039 | 3.832070e-03 | 5.388849e-03 |
| Traffic_Intensity_Nearest_Road_BL | -2.012591e-08 | 1.374170e-07 | -0.14645867 | 8.835595e-01 | 9.036404e-01 |
| Inv_Dist_Nearest_Road_BL | 2.315539e-02 | 8.754076e-03 | 2.64509789 | 8.167538e-03 | 1.020942e-02 |
| Traffic_Intensity_Nearest_Major_Road_BL | 6.273523e-09 | 3.168453e-08 | 0.19799952 | 8.430457e-01 | 8.822571e-01 |
| Inv_Dist_Nearest_Major_Road_BL | 1.130553e-01 | 4.096005e-02 | 2.76013480 | 5.778419e-03 | 7.662640e-03 |
| Total_Traffic_Load_Major_Roads_BL | 7.452351e-10 | 6.080250e-10 | 1.22566515 | 2.203265e-01 | 2.542229e-01 |
| Close_To_Major_Road_BL | 4.523449e-03 | 2.622341e-03 | 1.72496600 | 8.453556e-02 | 1.001079e-01 |
| Sum_Major_Road_Length_100m_BL | 2.448919e-05 | 8.874485e-06 | 2.75950599 | 5.789550e-03 | 7.662640e-03 |
| NO2_Air_Pollution_2005_BL | 6.901455e-04 | 6.417339e-05 | 10.75438708 | 5.774035e-27 | 1.528421e-26 |
| NO2_Air_Pollution_2006_BL | 7.637265e-04 | 7.071640e-05 | 10.79984976 | 3.524115e-27 | 9.911575e-27 |
| NO2_Air_Pollution_2007_BL | 5.751172e-04 | 6.048891e-05 | 9.50781269 | 1.973084e-21 | 4.228036e-21 |
| PM10_Air_Pollution_2007_BL | 2.322641e-03 | 2.264512e-04 | 10.25669793 | 1.124138e-24 | 2.810344e-24 |
| Avg_Daytime_Sound_Level_BL | 5.197040e-04 | 1.565317e-04 | 3.32012048 | 8.999901e-04 | 1.314527e-03 |
| Avg_Evening_Sound_Level_BL | 5.194333e-04 | 1.565314e-04 | 3.31839664 | 9.055632e-04 | 1.314527e-03 |
| Avg_Nighttime_Sound_Level_BL | 5.196961e-04 | 1.565325e-04 | 3.32005280 | 9.002083e-04 | 1.314527e-03 |
| Greenspace_Percentage_1000m_BL | 2.989184e-04 | 3.108843e-05 | 9.61510009 | 7.011639e-22 | 1.577619e-21 |
| Domestic_Garden_Percentage_1000m_BL | -3.820934e-05 | 5.967104e-05 | -0.64033305 | 5.219571e-01 | 5.592398e-01 |
| Water_Percentage_1000m_BL | -3.305552e-04 | 2.740126e-04 | -1.20635048 | 2.276844e-01 | 2.561450e-01 |
| Greenspace_Percentage_300m_BL | 2.445343e-04 | 2.867904e-05 | 8.52658609 | 1.521845e-17 | 2.739320e-17 |
| Domestic_Garden_Percentage_300m_BL | 1.251915e-04 | 4.581714e-05 | 2.73241689 | 6.287934e-03 | 8.084487e-03 |
| Water_Percentage_300m_BL | -5.068543e-06 | 2.255226e-04 | -0.02247466 | 9.820694e-01 | 9.820694e-01 |
| Natural_Env_Percentage_1000m_BL | 2.515189e-04 | 2.502143e-05 | 10.05213754 | 9.138440e-24 | 2.164367e-23 |
| Natural_Env_Percentage_300m_BL | 2.021245e-04 | 2.517774e-05 | 8.02790543 | 9.982280e-16 | 1.727702e-15 |
| Distance_To_Coast_Euclidean_BL | 1.731405e-05 | 2.376602e-05 | 0.72852138 | 4.662956e-01 | 5.117878e-01 |

This table presents linear regression results from sensitivity analyses examining affective symptoms (combined PHQ-9 and GAD-7 scores) at follow-up 2, using continuous resilience scores. Each regression includes one of 45 general adverse factors, resilience, and covariates as independent variables. The interaction between each adverse factor and resilience reflects the mitigating effect of resilience on mental health. Results include beta coefficients, t values, p-values, and FDR-corrected p-values for each interaction, as detailed in the table.

**Table S16: Linear regression analyses of PHQ score changes from follow-up 1 to follow-up 2 with resilience**

| **PHQ** | **PHQ at FU1** | | | **PHQ Change from FU1 to FU2** | | | **PHQ Change (adjusted PHQ at FU1)** | | |
| --- | --- | --- | --- | --- | --- | --- | --- | --- | --- |
| **Beta** | **T value** | **p-value** | **Beta** | **T value** | **p-value** | **Beta** | **T value** | **p-value** |
| **(Intercept)** | 6.51 (6.29, 6.72) | 59.34 | 0.00E+00 | -1.84 (-2.05, -1.63) | -17.29 | 6.88E-67 | 1.1 (0.91, 1.29) | 11.50 | 1.33E-30 |
| **Resilience (Low)** | —— | —— | —— | —— | —— | —— | —— | —— | —— |
| **Resilience (Medium)** | -1.53 (-1.58, -1.48) | -57.44 | 0.00E+00 | -0.49 (-0.54, -0.44) | -19.09 | 4.24E-81 | -1.18 (-1.23, -1.14) | -51.01 | 0.00E+00 |
| **Resilience (High)** | -2.2 (-2.25, -2.16) | -94.80 | 0.00E+00 | -0.66 (-0.71, -0.62) | -29.41 | 2.15E-189 | -1.66 (-1.7, -1.62) | -79.80 | 0.00E+00 |
| **Age** | -0.07 (-0.08, -0.07) | -53.32 | 0.00E+00 | 0.02 (0.02, 0.02) | 14.51 | 1.17E-47 | -0.01 (-0.02, -0.01) | -11.51 | 1.20E-30 |
| **Sex (Female)** | —— | —— | —— | —— | —— | —— | —— | —— | —— |
| **Sex (Male)** | -0.35 (-0.39, -0.31) | -16.73 | 9.51E-63 | 0.01 (-0.03, 0.05) | 0.42 | 6.75E-01 | -0.15 (-0.18, -0.11) | -8.32 | 8.83E-17 |
| **Ethnic (White)** | —— | —— | —— | —— | —— | —— | —— | —— | —— |
| **Ethnic (Asian)** | 0.19 (-0.02, 0.39) | 1.79 | 7.39E-02 | -0.43 (-0.63, -0.24) | -4.27 | 1.96E-05 | -0.35 (-0.53, -0.17) | -3.88 | 1.03E-04 |
| **Ethnic (Black)** | -0.48 (-0.75, -0.22) | -3.55 | 3.90E-04 | 0.01 (-0.25, 0.27) | 0.08 | 9.38E-01 | -0.21 (-0.44, 0.02) | -1.78 | 7.53E-02 |
| **Ethnic (Other)** | 0.5 (0.3, 0.7) | 4.88 | 1.04E-06 | -0.17 (-0.36, 0.03) | -1.69 | 9.16E-02 | 0.06 (-0.11, 0.23) | 0.66 | 5.06E-01 |
| **BMI** | 0.11 (0.11, 0.12) | 50.08 | 0.00E+00 | 0 (0, 0.01) | 1.98 | 4.73E-02 | 0.06 (0.05, 0.06) | 28.27 | 4.14E-175 |
| **Education** | -0.03 (-0.04, -0.03) | -13.87 | 1.00E-43 | 0.01 (0, 0.01) | 2.68 | 7.27E-03 | -0.01 (-0.01, 0) | -4.26 | 2.01E-05 |

This table presents linear regression results examining PHQ score changes from follow-up 1 to follow-up 2. The first regression uses PHQ scores at follow-up 1 as the dependent variable, with resilience and covariates as independent variables. The second regression uses the difference in PHQ scores (follow-up 2 minus follow-up 1) as the dependent variable, with resilience and covariates as independent variables. The third regression uses the same difference as the dependent variable, with resilience, covariates, and follow-up 1 PHQ scores as independent variables to control for baseline effects. Results include beta coefficients, t values, and p-values for each variable, as detailed in the table.

**Table S17: Linear regression analyses of GAD score changes from follow-up 1 to follow-up 2 with resilience**

| **GAD** | **GAD at FU1** | | | **GAD Change from FU1 to FU2** | | | **GAD Change (adjusted GAD at FU1)** | | |
| --- | --- | --- | --- | --- | --- | --- | --- | --- | --- |
| **Beta** | **T value** | **p-value** | **Beta** | **T value** | **p-value** | **Beta** | **T value** | **p-value** |
| **(Intercept)** | 6.12 (5.92, 6.33) | 59.48 | 0.00E+00 | -0.7 (-0.91, -0.5) | -6.78 | 1.21E-11 | 2.53 (2.36, 2.71) | 28.29 | 2.10E-175 |
| **Resilience (Low)** | —— | —— | —— | —— | —— | —— | —— | —— | —— |
| **Resilience (Medium)** | -1.49 (-1.54, -1.44) | -59.71 | 0.00E+00 | -0.41 (-0.46, -0.36) | -16.31 | 1.07E-59 | -1.2 (-1.24, -1.16) | -55.11 | 0.00E+00 |
| **Resilience (High)** | -2.13 (-2.17, -2.08) | -97.37 | 0.00E+00 | -0.52 (-0.57, -0.48) | -23.78 | 1.25E-124 | -1.65 (-1.68, -1.61) | -84.37 | 0.00E+00 |
| **Age** | -0.06 (-0.06, -0.05) | -44.43 | 0.00E+00 | 0.02 (0.01, 0.02) | 13.38 | 8.43E-41 | -0.01 (-0.02, -0.01) | -11.60 | 4.39E-31 |
| **Sex (Female)** | —— | —— | —— | —— | —— | —— | —— | —— | —— |
| **Sex (Male)** | -0.4 (-0.44, -0.36) | -20.56 | 8.95E-94 | 0.02 (-0.02, 0.05) | 0.80 | 4.21E-01 | -0.2 (-0.23, -0.16) | -11.73 | 9.76E-32 |
| **Ethnic (White)** | —— | —— | —— | —— | —— | —— | —— | —— | —— |
| **Ethnic (Asian)** | 0.41 (0.22, 0.61) | 4.17 | 3.09E-05 | -0.4 (-0.59, -0.2) | -3.98 | 6.87E-05 | -0.18 (-0.34, -0.01) | -2.11 | 3.52E-02 |
| **Ethnic (Black)** | -0.12 (-0.37, 0.13) | -0.91 | 3.63E-01 | -0.06 (-0.32, 0.19) | -0.50 | 6.16E-01 | -0.13 (-0.34, 0.09) | -1.15 | 2.50E-01 |
| **Ethnic (Other)** | 0.38 (0.19, 0.57) | 3.93 | 8.52E-05 | -0.05 (-0.24, 0.14) | -0.47 | 6.37E-01 | 0.15 (-0.01, 0.32) | 1.87 | 6.14E-02 |
| **BMI** | 0.03 (0.03, 0.04) | 15.43 | 1.11E-53 | 0 (-0.01, 0) | -0.72 | 4.70E-01 | 0.02 (0.01, 0.02) | 8.67 | 4.36E-18 |
| **Education** | -0.03 (-0.03, -0.02) | -11.96 | 6.04E-33 | 0 (0, 0.01) | 1.26 | 2.06E-01 | -0.01 (-0.02, -0.01) | -5.90 | 3.75E-09 |

This table presents linear regression results examining GAD score changes from follow-up 1 to follow-up 2. The first regression uses GAD scores at follow-up 1 as the dependent variable, with resilience and covariates as independent variables. The second regression uses the difference in GAD scores (follow-up 2 minus follow-up 1) as the dependent variable, with resilience and covariates as independent variables. The third regression uses the same difference as the dependent variable, with resilience, covariates, and follow-up 1 GAD scores as independent variables to control for baseline effects. Results include beta coefficients, t values, and p-values for each variable, as detailed in the table.

**Table S18: Characteristics of resilient and vulnerable groups at follow-up 1 before and after propensity-score matching**

| C**haracteristic** | **Unmatched** | | | | **Matched** | | | |
| --- | --- | --- | --- | --- | --- | --- | --- | --- |
| **Overall, N = 79,275** | **Vulnerable, N = 37,951** | **Resilient, N = 41,324** | **p-value** | **Overall, N = 7,724** | **Vulnerable, N = 3,862** | **Resilient, N = 3,862** | **p-value** |
| Sex |  |  |  | <0.001 |  |  |  | 0.6 |
| Female | 45,772 (58%) | 24,837 (65%) | 20,935 (51%) |  | 4,264 (55%) | 2,121 (55%) | 2,143 (55%) |  |
| Male | 33,503 (42%) | 13,114 (35%) | 20,389 (49%) |  | 3,460 (45%) | 1,741 (45%) | 1,719 (45%) |  |
| Age | 55 (7) | 55 (8) | 56 (7) | <0.001 | 57 (6) | 57 (6) | 57 (6) | 0.8 |
| Ethnic |  |  |  | 0.003 |  |  |  | 0.9 |
| White | 77,357 (98%) | 37,074 (98%) | 40,283 (97%) |  | 7,704 (100%) | 3,853 (100%) | 3,851 (100%) |  |
| Asian | 717 (0.9%) | 324 (0.9%) | 393 (1.0%) |  | 6 (<0.1%) | 2 (<0.1%) | 4 (0.1%) |  |
| Black | 442 (0.6%) | 177 (0.5%) | 265 (0.6%) |  | 5 (<0.1%) | 2 (<0.1%) | 3 (<0.1%) |  |
| Other | 759 (1.0%) | 376 (1.0%) | 383 (0.9%) |  | 9 (0.1%) | 5 (0.1%) | 4 (0.1%) |  |
| Education | 16.7 (4.3) | 16.7 (4.3) | 16.7 (4.3) | 0.014 | 18.0 (3.7) | 18.0 (3.7) | 18.0 (3.6) | 0.4 |
| BMI | 26.6 (4.5) | 26.5 (4.7) | 26.8 (4.3) | <0.001 | 25.41 (3.13) | 25.43 (3.15) | 25.40 (3.11) | 0.8 |
| PHQ at FU1 | 3.7 (3.6) | 4.9 (4.3) | 2.6 (2.4) | <0.001 | 1.68 (1.30) | 1.69 (1.32) | 1.68 (1.28) | 0.9 |
| GAD at FU1 | 2.09 (3.34) | 3.20 (3.99) | 1.06 (2.14) | <0.001 | 0.35 (1.16) | 0.36 (1.16) | 0.35 (1.16) | 0.4 |

This table presents characteristics of resilient and vulnerable groups at follow-up 1, including PHQ and GAD-7 scores and covariates, before and after propensity score matching. Matching was performed at a 1:1 ratio using the nearest neighbor method with a generalized linear model (GLM) for distance calculation and a caliper of 0.000001. Results compare group characteristics to assess the effect of propensity-score matching, as detailed in the table. Continuous variables are reported as mean (standard deviation, SD), and categorical variables are reported as number (percentage, %). Statistical comparisons across groups were performed using the Wilcoxon rank sum test for continuous variables and Pearson’s Chi-squared test for categorical variables.

**Table S19: Linear regression of PHQ score changes from follow-up 1 to follow-up 2 after propensity-score matching with resilience**

| **Term** | **Beta** | **T-value** | **p-value** |
| --- | --- | --- | --- |
| (Intercept) | 0.69 (0, 1.38) | 1.9645402 | 4.95E-02 |
| Resilience(High) | -1.01 (-1.11, -0.91) | -20.0624624 | 2.58E-87 |
| Age | 0 (-0.01, 0) | -1.1482412 | 2.51E-01 |
| Sex(Male) | -0.04 (-0.14, 0.07) | -0.6812521 | 4.96E-01 |
| Ethnic(Asian) | -0.58 (-2.35, 1.19) | -0.6443048 | 5.19E-01 |
| Ethnic(Black) | -0.87 (-2.81, 1.06) | -0.8835996 | 3.77E-01 |
| Ethnic(Other) | -0.25 (-1.7, 1.19) | -0.343886 | 7.31E-01 |
| BMI | 0 (-0.02, 0.01) | -0.2332674 | 8.16E-01 |
| Education | -0.01 (-0.02, 0.01) | -1.0800116 | 2.80E-01 |

To assess the contribution of resilience to changes in depression symptoms after balancing group characteristics, propensity score matching was performed at a 1:1 ratio using the nearest neighbor method with a generalized linear model (GLM) for distance calculation and a caliper of 0.000001 to balance PHQ-9, GAD-7, age, and gender at follow-up 1. Linear regression was then conducted with the difference in PHQ-9 scores (follow-up 2 minus follow-up 1) as the dependent variable and resilience, age, and gender as independent variables. The table shows beta coefficients, t values, and p-values for each variable, reflecting the role of resilience in PHQ-9 score changes.

**Table S20: Linear regression of GAD score changes from follow-up 1 to follow-up 2 after propensity-score matching with resilience**

| **Term** | **Beta** | **T-value** | **p-value** |
| --- | --- | --- | --- |
| (Intercept) | 1.78 (1.12, 2.45) | 5.2404833 | 1.64E-07 |
| Resilience(High) | -1.01 (-1.11, -0.92) | -20.8090782 | 1.29E-93 |
| Age | 0 (-0.01, 0.01) | -0.3988889 | 6.90E-01 |
| Sex(Male) | -0.2 (-0.3, -0.1) | -3.8930167 | 9.98E-05 |
| Ethnic(Asian) | -0.03 (-1.74, 1.69) | -0.0326374 | 9.74E-01 |
| Ethnic(Black) | 0.19 (-1.69, 2.07) | 0.1993666 | 8.42E-01 |
| Ethnic(Other) | 0.4 (-1, 1.8) | 0.5628941 | 5.74E-01 |
| BMI | -0.01 (-0.03, 0) | -1.5612197 | 1.19E-01 |
| Education | 0 (-0.02, 0.01) | -0.6609279 | 5.09E-01 |

To examine how resilience influences anxiety symptom changes after balancing group differences, linear regression was conducted following propensity score matching at follow-up 1. The dependent variable is the change in GAD-7 scores (follow-up 2 minus follow-up 1), with resilience and covariates (age and gender) as independent variables. The table reports beta coefficients, t values, and p-values, highlighting the role of resilience in GAD-7 score changes.

**Table S21: Characteristics of resilient and vulnerable groups at follow-up 1 by depression severity after propensity-score matching**

| **Characteristic** | **Low depression severity (matched, caliper = 0.000001)** | | | | **moderate depression severity (matched, caliper = 0.001)** | | | | **High depression severity (matched, caliper = 0.001)** | | | |
| --- | --- | --- | --- | --- | --- | --- | --- | --- | --- | --- | --- | --- |
| **Overall,**  **N = 7,158** | **Vulnerable,**  **N = 3,579** | **Resilient,**  **N = 3,579** | **p-value** | **Overall,**  **N = 8,430** | **Vulnerable,**  **N = 4,215** | **Resilient,**  **N = 4,215** | **p-value** | **Overall,**  **N = 1,442** | **Vulnerable,**  **N = 721** | **Resilient,**  **N = 721** | **p-value** |
| Sex |  |  |  | >0.9 |  |  |  | 0.2 |  |  |  | 0.3 |
| Female | 3,890 (54%) | 1,946 (54%) | 1,944 (54%) |  | 5,208 (62%) | 2,577 (61%) | 2,631 (62%) |  | 928 (64%) | 474 (66%) | 454 (63%) |  |
| Male | 3,268 (46%) | 1,633 (46%) | 1,635 (46%) |  | 3,222 (38%) | 1,638 (39%) | 1,584 (38%) |  | 514 (36%) | 247 (34%) | 267 (37%) |  |
| Age | 57 (6) | 57 (6) | 57 (6) | 0.9 | 54 (8) | 54 (8) | 54 (8) | >0.9 | 52 (7) | 52 (7) | 52 (7) | 0.3 |
| Ethnic |  |  |  | 0.3 |  |  |  | >0.9 |  |  |  | 0.7 |
| White | 7,136 (100%) | 3,572 (100%) | 3,564 (100%) |  | 8,199 (97%) | 4,099 (97%) | 4,100 (97%) |  | 1,398 (97%) | 698 (97%) | 700 (97%) |  |
| Asian | 7 (<0.1%) | 3 (<0.1%) | 4 (0.1%) |  | 68 (0.8%) | 32 (0.8%) | 36 (0.9%) |  | 19 (1.3%) | 8 (1.1%) | 11 (1.5%) |  |
| Black | 3 (<0.1%) | 1 (<0.1%) | 2 (<0.1%) |  | 52 (0.6%) | 26 (0.6%) | 26 (0.6%) |  | 6 (0.4%) | 4 (0.6%) | 2 (0.3%) |  |
| Other | 12 (0.2%) | 3 (<0.1%) | 9 (0.3%) |  | 111 (1.3%) | 58 (1.4%) | 53 (1.3%) |  | 19 (1.3%) | 11 (1.5%) | 8 (1.1%) |  |
| Education | 18.1 (3.6) | 18.1 (3.6) | 18.1 (3.6) | 0.8 | 16.5 (4.3) | 16.6 (4.3) | 16.5 (4.4) | 0.7 | 16.1 (4.5) | 16.1 (4.5) | 16.2 (4.5) | 0.8 |
| BMI | 25.30 (2.95) | 25.31 (2.98) | 25.30 (2.92) | >0.9 | 27.3 (4.8) | 27.3 (4.8) | 27.3 (4.7) | >0.9 | 28.1 (5.6) | 28.0 (5.6) | 28.2 (5.6) | 0.7 |
| PHQ_FU1 | 1.45 (0.80) | 1.45 (0.80) | 1.45 (0.79) | >0.9 | 6.28 (1.28) | 6.27 (1.27) | 6.29 (1.29) | 0.8 | 13.2 (3.4) | 13.2 (3.3) | 13.2 (3.4) | 0.7 |
| GAD_FU1 | 0.20 (0.76) | 0.20 (0.74) | 0.20 (0.77) | >0.9 | 3.19 (2.80) | 3.21 (2.77) | 3.17 (2.83) | 0.2 | 7.2 (4.7) | 7.2 (4.6) | 7.2 (4.7) | 0.8 |

To prepare for evaluating depression severity changes from follow-up 1 to follow-up 2 between resilient and vulnerable groups, propensity score matching was applied to balance characteristics across low, moderate, and high depression severity subgroups at follow-up 1. Descriptive statistics for PHQ-9 scores, GAD-7 scores, and covariates are reported as means (standard deviations) for continuous variables and counts (percentages) for categorical variables. Group differences are assessed using Wilcoxon rank sum tests for continuous variables and Pearson’s Chi-squared or Fisher’s exact tests for categorical variables, as detailed in the table.

**Table S22: Characteristics of resilient and vulnerable groups at follow-up 1 by GAD severity after propensity-score matching**

| **Characteristic** | **Low anxiety severity (matched, caliper = 0.000001)** | | | | **moderate anxiety severity (matched, caliper = 0.001)** | | | | **High anxiety severity (matched, caliper = 0.001)** | | | |
| --- | --- | --- | --- | --- | --- | --- | --- | --- | --- | --- | --- | --- |
| **Overall,**  **N = 7,636** | **Vulnerable,**  **N = 3,818** | **Resilient,**  **N = 3,818** | **p-value** | **Overall,**  **N = 4,548** | **Vulnerable, N = 2,274** | **Resilient,**  **N = 2,274** | **p-value** | **Overall,**  **N = 588** | **Vulnerable,**  **N = 294** | **Resilient,**  **N = 294** | **p-value** |
| Sex |  |  |  | 0.3 |  |  |  | 0.2 |  |  |  | 0.5 |
| Female | 4,160 (54%) | 2,059 (54%) | 2,101 (55%) |  | 3,036 (67%) | 1,498 (66%) | 1,538 (68%) |  | 396 (67%) | 202 (69%) | 194 (66%) |  |
| Male | 3,476 (46%) | 1,759 (46%) | 1,717 (45%) |  | 1,512 (33%) | 776 (34%) | 736 (32%) |  | 192 (33%) | 92 (31%) | 100 (34%) |  |
| Age | 57 (7) | 57 (7) | 57 (6) | 0.6 | 54 (8) | 54 (8) | 54 (8) | 0.6 | 53 (7) | 52 (7) | 53 (7) | 0.5 |
| Ethnic |  |  |  | 0.056 |  |  |  | >0.9 | *NA* | *NA* | *NA* | 0.6 |
| White | 7,614 (100%) | 3,807 (100%) | 3,807 (100%) |  | 4,438 (98%) | 2,219 (98%) | 2,219 (98%) |  | 572 (97%) | 288 (98%) | 284 (97%) |  |
| Asian | 3 (<0.1%) | 3 (<0.1%) | 0 (0%) |  | 31 (0.7%) | 17 (0.7%) | 14 (0.6%) |  | 11 (1.9%) | 4 (1.4%) | 7 (2.4%) |  |
| Black | 5 (<0.1%) | 4 (0.1%) | 1 (<0.1%) |  | 24 (0.5%) | 12 (0.5%) | 12 (0.5%) |  | 0 (0%) | 0 (0%) | 0 (0%) |  |
| Other | 14 (0.2%) | 4 (0.1%) | 10 (0.3%) |  | 55 (1.2%) | 26 (1.1%) | 29 (1.3%) |  | 5 (0.9%) | 2 (0.7%) | 3 (1.0%) |  |
| Education | 18.1 (3.6) | 18.1 (3.6) | 18.1 (3.6) | 0.6 | 16.5 (4.4) | 16.5 (4.4) | 16.5 (4.4) | >0.9 | 16.4 (4.5) | 16.4 (4.4) | 16.4 (4.6) | >0.9 |
| BMI | 25.37 (3.07) | 25.40 (3.12) | 25.33 (3.03) | 0.5 | 26.7 (4.8) | 26.8 (5.0) | 26.7 (4.5) | 0.5 | 26.7 (5.4) | 26.9 (5.9) | 26.6 (4.9) | >0.9 |
| PHQ_FU1 | 1.59 (1.05) | 1.61 (1.07) | 1.57 (1.03) | 0.12 | 6.1 (3.5) | 6.1 (3.5) | 6.0 (3.5) | 0.3 | 10.6 (5.3) | 10.6 (5.3) | 10.7 (5.3) | >0.9 |
| GAD_FU1 | 0.20 (0.68) | 0.21 (0.68) | 0.20 (0.68) | 0.5 | 6.07 (1.15) | 6.06 (1.16) | 6.07 (1.14) | 0.6 | 13.39 (2.95) | 13.31 (2.96) | 13.47 (2.95) | 0.4 |

To prepare for evaluating anxiety severity changes from follow-up 1 to follow-up 2 between resilient and vulnerable groups, propensity score matching was applied to balance characteristics across low, moderate, and high GAD severity subgroups at follow-up 1. Descriptive statistics for GAD-7 scores, PHQ-9 scores, and covariates are reported as means (standard deviations) for continuous variables and counts (percentages) for categorical variables. Group differences are assessed using Wilcoxon rank sum tests for continuous variables and Pearson’s Chi-squared or Fisher’s exact tests for categorical variables, as detailed in the table.

**Table S23: Correlations of blood parameters with trauma exposure, affective disorder, and resilience**

| **Biomarker** | **N** | **Trauma exposure** | | | **Affective disorders** | | | **Resilience** | | |
| --- | --- | --- | --- | --- | --- | --- | --- | --- | --- | --- |
| **r** | **p** | **pfdr** | **r** | **p** | **pfdr** | **r** | **p** | **pfdr** |
| Albumin | 133078 | -1.59E-02 | 2.65E-09 | 1.47E-08 | -0.0194 | 1.47E-12 | 4.28E-12 | 1.76E-03 | 5.22E-01 | 7.24E-01 |
| ALP | 145739 | 2.29E-02 | 1.01E-17 | 2.04E-16 | 0.027754 | 3.10E-26 | 1.58E-25 | -1.31E-02 | 5.24E-07 | 2.46E-06 |
| ALT | 145698 | 1.04E-02 | 9.93E-05 | 2.42E-04 | 0.016058 | 8.84E-10 | 2.16E-09 | -1.05E-02 | 5.82E-05 | 1.87E-04 |
| Apo_A | 132281 | -9.03E-03 | 7.37E-04 | 1.40E-03 | -0.03148 | 2.34E-30 | 1.78E-29 | 2.35E-02 | 1.12E-17 | 2.27E-16 |
| Apo_B | 145070 | -4.36E-03 | 1.03E-01 | 1.40E-01 | 0.000752 | 7.74E-01 | 8.15E-01 | 1.05E-02 | 6.35E-05 | 1.94E-04 |
| AST | 145249 | 4.60E-03 | 8.59E-02 | 1.19E-01 | 0.009676 | 2.26E-04 | 3.84E-04 | -1.03E-02 | 8.35E-05 | 2.43E-04 |
| Baso_Count | 148273 | 1.14E-02 | 1.94E-05 | 5.15E-05 | 0.01027 | 7.68E-05 | 1.38E-04 | -2.36E-03 | 3.64E-01 | 5.55E-01 |
| Baso_Percentage | 148276 | 6.00E-03 | 2.50E-02 | 3.91E-02 | 0.004716 | 6.94E-02 | 8.82E-02 | 2.71E-04 | 9.17E-01 | 9.48E-01 |
| Calcium | 133045 | -5.95E-03 | 2.61E-02 | 3.98E-02 | -0.01218 | 8.82E-06 | 1.63E-05 | 3.41E-03 | 2.13E-01 | 3.61E-01 |
| Cholesterol | 145737 | -7.65E-03 | 4.26E-03 | 7.43E-03 | -0.00919 | 4.49E-04 | 7.22E-04 | 1.52E-02 | 6.58E-09 | 5.73E-08 |
| Creatinine | 145659 | -1.69E-03 | 5.28E-01 | 5.96E-01 | -0.00869 | 9.11E-04 | 1.43E-03 | 1.48E-02 | 1.50E-08 | 1.01E-07 |
| CRP | 145448 | 1.87E-02 | 2.86E-12 | 1.94E-11 | 0.034026 | 1.60E-38 | 1.96E-37 | -1.11E-02 | 2.30E-05 | 7.81E-05 |
| Cystatin_C | 145727 | 3.40E-02 | 4.11E-37 | 2.51E-35 | 0.039541 | 1.65E-51 | 3.35E-50 | -1.49E-02 | 1.23E-08 | 9.39E-08 |
| Direct_Bili | 124915 | -6.29E-03 | 1.87E-02 | 2.99E-02 | -0.01599 | 1.59E-08 | 3.58E-08 | 8.33E-03 | 3.26E-03 | 7.65E-03 |
| Eos_Count | 148273 | 2.35E-03 | 3.79E-01 | 4.45E-01 | 0.007951 | 2.20E-03 | 3.28E-03 | -5.49E-03 | 3.44E-02 | 7.23E-02 |
| Eos_Percentage | 148276 | -4.20E-03 | 1.17E-01 | 1.55E-01 | -0.00379 | 1.45E-01 | 1.73E-01 | 4.69E-06 | 9.99E-01 | 9.99E-01 |
| Estradiol | 26976 | 3.40E-03 | 2.04E-01 | 2.44E-01 | -0.00037 | 9.52E-01 | 9.52E-01 | 4.96E-03 | 4.15E-01 | 6.03E-01 |
| GGT | 145681 | 2.02E-02 | 4.41E-14 | 5.38E-13 | 0.029311 | 4.64E-29 | 3.14E-28 | -5.68E-03 | 3.03E-02 | 6.59E-02 |
| Glucose | 132937 | 1.22E-03 | 6.47E-01 | 7.05E-01 | 0.006269 | 2.23E-02 | 2.96E-02 | -4.01E-03 | 1.44E-01 | 2.58E-01 |
| HbA1c | 144893 | 1.95E-02 | 3.09E-13 | 2.69E-12 | 0.029316 | 6.37E-29 | 3.88E-28 | -1.25E-02 | 1.80E-06 | 7.48E-06 |
| HCT | 148537 | -9.82E-03 | 2.43E-04 | 4.93E-04 | -0.01717 | 3.69E-11 | 1.02E-10 | 9.50E-03 | 2.53E-04 | 6.70E-04 |
| HDL_C | 133047 | -1.01E-02 | 1.64E-04 | 3.71E-04 | -0.03527 | 6.71E-38 | 6.82E-37 | 2.35E-02 | 9.82E-18 | 2.27E-16 |
| HGB | 148537 | -1.07E-02 | 6.45E-05 | 1.64E-04 | -0.01916 | 1.53E-13 | 5.49E-13 | 9.62E-03 | 2.11E-04 | 5.85E-04 |
| HLSR_Count | 145678 | 8.36E-03 | 1.79E-03 | 3.21E-03 | 0.01464 | 2.30E-08 | 5.02E-08 | -1.37E-03 | 6.01E-01 | 7.64E-01 |
| HLSR_Percentage | 145679 | 1.18E-02 | 9.66E-06 | 3.10E-05 | 0.015106 | 8.15E-09 | 1.91E-08 | -1.24E-03 | 6.36E-01 | 7.73E-01 |
| IGF_1 | 144975 | -1.20E-02 | 6.90E-06 | 2.34E-05 | -0.02385 | 1.06E-19 | 4.99E-19 | 3.41E-03 | 1.95E-01 | 3.39E-01 |
| IRF | 145679 | 9.98E-03 | 1.90E-04 | 4.07E-04 | 0.016151 | 7.08E-10 | 1.80E-09 | -5.45E-03 | 3.77E-02 | 7.66E-02 |
| LDL_C | 145482 | -8.87E-03 | 9.16E-04 | 1.69E-03 | -0.00591 | 2.43E-02 | 3.15E-02 | 1.32E-02 | 4.84E-07 | 2.46E-06 |
| Lp(a) | 117054 | -2.81E-04 | 9.16E-01 | 9.32E-01 | -0.00128 | 6.62E-01 | 7.08E-01 | -5.16E-04 | 8.60E-01 | 9.04E-01 |
| Lymph_Count | 148273 | 7.50E-03 | 5.09E-03 | 8.62E-03 | 0.009703 | 1.87E-04 | 3.26E-04 | -1.61E-03 | 5.36E-01 | 7.27E-01 |
| Lymph_Percentage | 148276 | -1.16E-02 | 1.52E-05 | 4.41E-05 | -0.02117 | 3.54E-16 | 1.44E-15 | 1.33E-02 | 3.29E-07 | 2.01E-06 |
| MCH | 148536 | 9.40E-03 | 4.41E-04 | 8.67E-04 | 0.003242 | 2.12E-01 | 2.44E-01 | 5.76E-04 | 8.24E-01 | 8.98E-01 |
| MCHC | 148535 | -1.05E-03 | 6.96E-01 | 7.44E-01 | -0.00414 | 1.11E-01 | 1.38E-01 | -4.82E-04 | 8.53E-01 | 9.04E-01 |
| MCV | 148536 | 1.23E-02 | 4.04E-06 | 1.54E-05 | 0.006671 | 1.01E-02 | 1.38E-02 | 1.19E-03 | 6.46E-01 | 7.73E-01 |
| Mono_Count | 148273 | 5.64E-03 | 3.50E-02 | 5.08E-02 | 0.007733 | 2.91E-03 | 4.22E-03 | -8.90E-03 | 6.10E-04 | 1.55E-03 |
| Mono_Percentage | 148276 | -3.96E-03 | 1.39E-01 | 1.73E-01 | -0.01267 | 1.07E-06 | 2.10E-06 | 2.03E-04 | 9.38E-01 | 9.53E-01 |
| MPV | 148534 | -1.15E-02 | 1.87E-05 | 5.15E-05 | -0.01701 | 5.48E-11 | 1.45E-10 | 2.71E-03 | 2.97E-01 | 4.77E-01 |
| MRV | 145679 | 1.30E-02 | 1.17E-06 | 5.09E-06 | 0.003048 | 2.45E-01 | 2.76E-01 | -8.53E-04 | 7.45E-01 | 8.41E-01 |
| MSCV | 145679 | 1.26E-02 | 2.35E-06 | 9.56E-06 | 0.00395 | 1.32E-01 | 1.61E-01 | 2.62E-03 | 3.17E-01 | 4.96E-01 |
| Neut_Count | 148273 | 2.00E-02 | 7.23E-14 | 7.35E-13 | 0.036719 | 2.07E-45 | 3.16E-44 | -1.51E-02 | 6.50E-09 | 5.73E-08 |
| Neut_Percentage | 148276 | 1.18E-02 | 1.01E-05 | 3.10E-05 | 0.022882 | 1.24E-18 | 5.40E-18 | -1.16E-02 | 8.28E-06 | 3.16E-05 |
| NRBC_Count | 148270 | -4.08E-04 | 8.79E-01 | 9.09E-01 | 0.001485 | 5.67E-01 | 6.29E-01 | -2.87E-03 | 2.69E-01 | 4.44E-01 |
| NRBC_Percentage | 148271 | -4.11E-04 | 8.78E-01 | 9.09E-01 | 0.000331 | 8.99E-01 | 9.29E-01 | -1.39E-03 | 5.92E-01 | 7.64E-01 |
| PCT | 148534 | 4.05E-03 | 1.30E-01 | 1.69E-01 | 0.01348 | 2.05E-07 | 4.17E-07 | 1.09E-03 | 6.75E-01 | 7.92E-01 |
| PDW | 148534 | -1.47E-03 | 5.83E-01 | 6.47E-01 | 0.00118 | 6.49E-01 | 7.07E-01 | -3.89E-03 | 1.34E-01 | 2.47E-01 |
| Phosphate | 132828 | 9.97E-03 | 1.93E-04 | 4.07E-04 | 0.008963 | 1.09E-03 | 1.66E-03 | -7.20E-04 | 7.93E-01 | 8.79E-01 |
| Platelet_Count | 148536 | 1.02E-02 | 1.33E-04 | 3.12E-04 | 0.020831 | 9.87E-16 | 3.76E-15 | -9.55E-04 | 7.13E-01 | 8.20E-01 |
| RBC_Count | 148537 | -1.58E-02 | 3.72E-09 | 1.89E-08 | -0.01898 | 2.55E-13 | 8.66E-13 | 7.69E-03 | 3.02E-03 | 7.38E-03 |
| RDW | 148536 | 1.83E-02 | 9.02E-12 | 5.50E-11 | 0.012619 | 1.16E-06 | 2.20E-06 | -4.71E-03 | 6.95E-02 | 1.37E-01 |
| Retic_Count | 145678 | 3.97E-03 | 1.38E-01 | 1.73E-01 | 0.007762 | 3.05E-03 | 4.33E-03 | 1.68E-03 | 5.20E-01 | 7.24E-01 |
| Retic_Percentage | 145679 | 6.99E-03 | 9.03E-03 | 1.49E-02 | 0.009502 | 2.87E-04 | 4.73E-04 | 1.26E-03 | 6.31E-01 | 7.73E-01 |
| RF | 12394 | 2.15E-03 | 4.22E-01 | 4.86E-01 | 0.01184 | 1.88E-01 | 2.20E-01 | -7.38E-03 | 4.12E-01 | 6.03E-01 |
| SHBG | 131800 | -4.44E-05 | 9.87E-01 | 9.87E-01 | 0.00024 | 9.30E-01 | 9.46E-01 | 1.49E-03 | 5.89E-01 | 7.64E-01 |
| Testosterone | 132074 | 5.66E-03 | 3.45E-02 | 5.08E-02 | -0.00737 | 7.37E-03 | 1.02E-02 | 7.23E-03 | 8.62E-03 | 1.95E-02 |
| TG | 145632 | 2.05E-02 | 1.61E-14 | 2.46E-13 | 0.042823 | 4.50E-60 | 1.37E-58 | -2.10E-02 | 1.11E-15 | 1.35E-14 |
| Total_Bili | 145177 | -1.44E-02 | 7.86E-08 | 3.69E-07 | -0.02908 | 1.55E-28 | 8.59E-28 | 1.25E-02 | 1.84E-06 | 7.48E-06 |
| Total_Protein | 132952 | -1.23E-02 | 4.31E-06 | 1.55E-05 | -0.01453 | 1.18E-07 | 2.48E-07 | 4.19E-03 | 1.27E-01 | 2.41E-01 |
| Urea | 145642 | -4.76E-03 | 7.51E-02 | 1.06E-01 | -0.01903 | 3.76E-13 | 1.15E-12 | 1.15E-02 | 1.17E-05 | 4.19E-05 |
| Uric_Acid | 145582 | 3.42E-03 | 2.01E-01 | 2.44E-01 | -0.01904 | 3.72E-13 | 1.15E-12 | 2.18E-02 | 9.94E-17 | 1.52E-15 |
| Vitamin_D | 139696 | -2.30E-02 | 9.32E-18 | 2.04E-16 | -0.06413 | 3.38E-127 | 2.06E-125 | 4.51E-02 | 9.04E-64 | 5.51E-62 |
| WBC_Count | 148535 | 1.93E-02 | 4.93E-13 | 3.76E-12 | 0.033292 | 1.07E-37 | 9.34E-37 | -1.32E-02 | 4.02E-07 | 2.23E-06 |

The table reports correlation coefficients and p-values for each blood parameter with trauma exposure at baseline, PHQ-4 at baseline, and resilience scores.

**Table S24: Mediation of blood parameters in the pathway from trauma exposure to affective disorder**

| **Biomarker** | **Estimate** | **CI_lower** | **CI_upper** | **p-value** | **Path a** | **pa** | **Path b** | **pb** | **Path c** | **pc** |
| --- | --- | --- | --- | --- | --- | --- | --- | --- | --- | --- |
| Albumin | 0.0007 | 0.0004 | 0.0010 | 0 | -0.0208 | 2.65E-09 | -0.0317 | 7.52E-10 | 0.4134408 | 0 |
| ALP | 0.0013 | 0.0009 | 0.0018 | 0 | 0.0261 | 1.01E-17 | 0.0502 | 1.74E-20 | 0.4124686 | 0 |
| ALT | 0.0004 | 0.0001 | 0.0006 | 0 | 0.0119 | 9.93E-05 | 0.0299 | 2.87E-08 | 0.4133357 | 0 |
| Apo_A | 0.0007 | 0.0003 | 0.0011 | 0.002 | -0.0109 | 7.37E-04 | -0.0621 | 2.54E-28 | 0.4142015 | 0 |
| Baso_Count | 0.0002 | 0.0001 | 0.0004 | 0.002 | 0.0140 | 1.94E-05 | 0.0162 | 1.06E-03 | 0.4164054 | 0 |
| Calcium | 0.0002 | 0.0000 | 0.0004 | 0.028 | -0.0080 | 2.61E-02 | -0.0207 | 3.69E-05 | 0.4138817 | 0 |
| Cholesterol | 0.0001 | 0.0000 | 0.0003 | 0.004 | -0.0095 | 4.26E-03 | -0.0152 | 2.15E-03 | 0.4136912 | 0 |
| CRP | 0.0014 | 0.0010 | 0.0019 | 0 | 0.0209 | 2.86E-12 | 0.0661 | 5.23E-33 | 0.4124807 | 0 |
| Cystatin_C | 0.0028 | 0.0022 | 0.0034 | 0 | 0.0309 | 4.11E-37 | 0.0893 | 2.07E-39 | 0.4108007 | 0 |
| Direct_Bili | 0.0002 | 0.0000 | 0.0005 | 0.03 | -0.0084 | 1.87E-02 | -0.0284 | 9.45E-08 | 0.3979047 | 0 |
| GGT | 0.0013 | 0.0008 | 0.0018 | 0 | 0.0202 | 4.41E-14 | 0.0619 | 8.74E-24 | 0.4121711 | 0 |
| HbA1c | 0.0012 | 0.0008 | 0.0017 | 0 | 0.0190 | 3.09E-13 | 0.0640 | 7.56E-24 | 0.4134554 | 0 |
| HCT | 0.0004 | 0.0001 | 0.0006 | 0 | -0.0098 | 2.43E-04 | -0.0370 | 1.21E-09 | 0.4159972 | 0 |
| HDL_C | 0.0008 | 0.0004 | 0.0013 | 0 | -0.0117 | 1.64E-04 | -0.0720 | 2.34E-35 | 0.4135133 | 0 |
| HGB | 0.0004 | 0.0002 | 0.0007 | 0 | -0.0103 | 6.45E-05 | -0.0426 | 1.03E-11 | 0.4158774 | 0 |
| HLSR_Count | 0.0003 | 0.0001 | 0.0005 | 0.002 | 0.0096 | 1.79E-03 | 0.0276 | 2.89E-07 | 0.4161523 | 0 |
| HLSR_Percentage | 0.0004 | 0.0002 | 0.0006 | 0 | 0.0102 | 9.66E-06 | 0.0364 | 3.66E-07 | 0.4160069 | 0 |
| IGF_1 | 0.0006 | 0.0003 | 0.0010 | 0 | -0.0148 | 6.90E-06 | -0.0426 | 3.11E-17 | 0.4125833 | 0 |
| IRF | 0.0003 | 0.0001 | 0.0006 | 0 | 0.0121 | 1.90E-04 | 0.0287 | 2.02E-08 | 0.4160328 | 0 |
| LDL_C | 0.0001 | 0.0000 | 0.0002 | 0.08 | -0.0112 | 9.16E-04 | -0.0084 | 8.65E-02 | 0.4134481 | 0 |
| Lymph_Count | 0.0002 | 0.0000 | 0.0004 | 0.014 | 0.0079 | 5.09E-03 | 0.0191 | 9.46E-04 | 0.416482 | 0 |
| Lymph_Percentage | 0.0005 | 0.0003 | 0.0008 | 0 | -0.0144 | 1.52E-05 | -0.0365 | 5.25E-14 | 0.4161089 | 0 |
| MCV | 0.0001 | 0.0000 | 0.0003 | 0.076 | 0.0145 | 4.04E-06 | 0.0093 | 7.01E-02 | 0.4162393 | 0 |
| MPV | 0.0004 | 0.0002 | 0.0007 | 0 | -0.0148 | 1.87E-05 | -0.0278 | 3.34E-09 | 0.4158976 | 0 |
| Neut_Count | 0.0016 | 0.0011 | 0.0021 | 0 | 0.0238 | 7.23E-14 | 0.0665 | 5.72E-39 | 0.4150476 | 0 |
| Neut_Percentage | 0.0006 | 0.0003 | 0.0009 | 0 | 0.0150 | 1.01E-05 | 0.0391 | 2.89E-16 | 0.4160515 | 0 |
| Phosphate | 0.0002 | 0.0000 | 0.0004 | 0.008 | 0.0131 | 1.93E-04 | 0.0138 | 7.55E-03 | 0.4135391 | 0 |
| Platelet_Count | 0.0005 | 0.0002 | 0.0007 | 0 | 0.0123 | 1.33E-04 | 0.0376 | 7.07E-14 | 0.4158433 | 0 |
| RBC_Count | 0.0006 | 0.0003 | 0.0009 | 0 | -0.0163 | 3.72E-09 | -0.0375 | 1.51E-10 | 0.415747 | 0 |
| RDW | 0.0004 | 0.0002 | 0.0007 | 0 | 0.0218 | 9.02E-12 | 0.0190 | 1.73E-04 | 0.4159598 | 0 |
| Retic_Percentage | 0.0001 | 0.0000 | 0.0003 | 0.008 | 0.0084 | 9.03E-03 | 0.0166 | 1.24E-03 | 0.4162394 | 0 |
| TG | 0.0019 | 0.0014 | 0.0025 | 0 | 0.0236 | 1.61E-14 | 0.0819 | 1.25E-52 | 0.4115382 | 0 |
| Total_Bili | 0.0009 | 0.0006 | 0.0013 | 0 | -0.0187 | 7.86E-08 | -0.0491 | 5.70E-25 | 0.4122373 | 0 |
| Total_Protein | 0.0004 | 0.0002 | 0.0006 | 0 | -0.0162 | 4.31E-06 | -0.0234 | 4.61E-06 | 0.4139098 | 0 |
| Vitamin_D | 0.0034 | 0.0026 | 0.0042 | 0 | -0.0291 | 9.32E-18 | -0.1156 | 7.75E-116 | 0.4053771 | 0 |
| WBC_Count | 0.0014 | 0.0009 | 0.0019 | 0 | 0.0214 | 4.93E-13 | 0.0644 | 5.32E-32 | 0.4149386 | 0 |

To explore the mediating role of blood parameters in the relationship between trauma exposure and affective symptoms, mediation analyses were conducted at baseline 1. Path a (trauma exposure to blood parameters), path b (blood parameters to PHQ-4 scores), path c (direct effect of trauma exposure on PHQ-4 scores), and indirect effects are reported with their estimates and p-values, as detailed in the table.

**Table S25: Regression analysis of blood parameters and resilience interactions on affective disorder**

| **Main effect of biomarker on affective disorder** | | | | | | **Interaction effect of biomarker and resilience** | | | | | |
| --- | --- | --- | --- | --- | --- | --- | --- | --- | --- | --- | --- |
| **Biomarker** | **estimate** | **std.error** | **statistic** | **p-value** | **pfdr** | **Interaction term** | **estimate** | **std.error** | **statistic** | **p-value** | **pfdr** |
| Albumin | -0.04652 | 0.009142 | -5.08884 | 3.61E-07 | 5.01E-07 | Albumin:Resilience | 0.009069 | 0.002468 | 3.675342 | 2.38E-04 | 3.30E-04 |
| ALP | 0.008321 | 0.000947 | 8.79075 | 1.50E-18 | 3.75E-18 | ALP:Resilience | -0.00179 | 0.000256 | -7.01036 | 2.39E-12 | 5.97E-12 |
| ALT | 0.016587 | 0.001672 | 9.919494 | 3.48E-23 | 1.09E-22 | ALT:Resilience | -0.00408 | 0.000453 | -9.00007 | 2.28E-19 | 9.51E-19 |
| CRP | 0.06833 | 0.005744 | 11.89547 | 1.29E-32 | 8.09E-32 | CRP:Resilience | -0.0149 | 0.001567 | -9.50857 | 1.96E-21 | 1.23E-20 |
| Cystatin_C | 1.300277 | 0.165187 | 7.87154 | 3.53E-15 | 6.78E-15 | Cystatin_C:Resilience | -0.21588 | 0.044458 | -4.85575 | 1.20E-06 | 1.88E-06 |
| GGT | 0.007081 | 0.000666 | 10.62659 | 2.29E-26 | 1.15E-25 | GGT:Resilience | -0.00153 | 0.00018 | -8.48043 | 2.26E-17 | 8.09E-17 |
| HbA1c | 0.028282 | 0.004235 | 6.678754 | 2.42E-11 | 3.78E-11 | HbA1c:Resilience | -0.00528 | 0.00114 | -4.62729 | 3.71E-06 | 5.45E-06 |
| HCT | -0.02824 | 0.00657 | -4.29839 | 1.72E-05 | 2.27E-05 | HCT:Resilience | 0.005227 | 0.001757 | 2.974443 | 2.94E-03 | 3.67E-03 |
| HDL_C | -0.74223 | 0.062194 | -11.934 | 8.18E-33 | 6.82E-32 | HDL_C:Resilience | 0.16299 | 0.016758 | 9.726382 | 2.37E-22 | 1.97E-21 |
| HGB | -0.0788 | 0.018768 | -4.19847 | 2.69E-05 | 3.36E-05 | HGB:Resilience | 0.013207 | 0.005013 | 2.634607 | 8.42E-03 | 1.00E-02 |
| HLSR_Percentage | 1.049758 | 0.104438 | 10.05154 | 9.21E-24 | 3.29E-23 | HLSR_Percentage:Resilience | -0.24975 | 0.027566 | -9.05992 | 1.32E-19 | 6.61E-19 |
| IGF_1 | -0.02908 | 0.004066 | -7.15158 | 8.62E-13 | 1.44E-12 | IGF_1:Resilience | 0.005911 | 0.001101 | 5.370125 | 7.88E-08 | 1.41E-07 |
| IRF | 3.025419 | 0.377981 | 8.00416 | 1.21E-15 | 2.63E-15 | IRF:Resilience | -0.70447 | 0.101868 | -6.91558 | 4.68E-12 | 1.06E-11 |
| Lymph_Percentage | -0.00579 | 0.003104 | -1.86461 | 6.22E-02 | 6.48E-02 | Lymph_Percentage:Resilience | 0.000437 | 0.000839 | 0.520783 | 6.03E-01 | 6.04E-01 |
| MPV | -0.12626 | 0.020717 | -6.09476 | 1.10E-09 | 1.62E-09 | MPV:Resilience | 0.027274 | 0.005611 | 4.860785 | 1.17E-06 | 1.88E-06 |
| Neut_Count | 0.160091 | 0.016799 | 9.529583 | 1.60E-21 | 4.45E-21 | Neut_Count:Resilience | -0.03187 | 0.004542 | -7.0167 | 2.28E-12 | 5.97E-12 |
| Neut_Percentage | 0.010793 | 0.002694 | 4.006569 | 6.16E-05 | 7.34E-05 | Neut_Percentage:Resilience | -0.00183 | 0.000727 | -2.51966 | 1.17E-02 | 1.33E-02 |
| Platelet_Count | 0.002911 | 0.000384 | 7.570306 | 3.74E-14 | 6.69E-14 | Platelet_Count:Resilience | -0.00062 | 0.000104 | -5.95937 | 2.54E-09 | 4.88E-09 |
| RBC_Count | -0.16357 | 0.056296 | -2.90553 | 3.67E-03 | 3.99E-03 | RBC_Count:Resilience | 0.020754 | 0.015053 | 1.378683 | 1.68E-01 | 1.83E-01 |
| RDW | 0.095726 | 0.024131 | 3.966916 | 7.28E-05 | 8.28E-05 | RDW:Resilience | -0.02043 | 0.006557 | -3.11534 | 1.84E-03 | 2.42E-03 |
| TG | 0.351971 | 0.023029 | 15.28352 | 1.08E-52 | 2.71E-51 | TG:Resilience | -0.07672 | 0.006163 | -12.4491 | 1.47E-35 | 3.69E-34 |
| Total_Bili | -0.04062 | 0.005079 | -7.99894 | 1.26E-15 | 2.63E-15 | Total_Bili:Resilience | 0.008309 | 0.001363 | 6.095634 | 1.09E-09 | 2.28E-09 |
| Total_Protein | -0.009 | 0.005902 | -1.52548 | 1.27E-01 | 1.27E-01 | Total_Protein:Resilience | 0.000827 | 0.001594 | 0.518591 | 6.04E-01 | 6.04E-01 |
| Vitamin_D | -0.01592 | 0.001105 | -14.4025 | 5.40E-47 | 6.75E-46 | Vitamin_D:Resilience | 0.003138 | 0.000296 | 10.58801 | 3.47E-26 | 4.33E-25 |
| WBC_Count | 0.125568 | 0.012035 | 10.4339 | 1.77E-25 | 7.38E-25 | WBC_Count:Resilience | -0.02658 | 0.003257 | -8.15864 | 3.41E-16 | 1.07E-15 |

To examine whether resilience moderates the impact of blood parameters on affective symptoms, separate linear regression analyses were conducted for each blood parameter at baseline. Each model includes a blood parameter, resilience, and covariates as independent variables, with PHQ-4 scores as dependent variables. The table reports beta coefficients and p-values for the main effects of each blood parameter and the interaction effects between resilience and each blood parameter.

**Table S26: Correlation differences of blood parameters with affective disorder at baseline between resilient and vulnerable groups**

| **Biomarker** | **N** | **Vulnerable group** | | **Resilient group** | | **Correlation difference** | | |
| --- | --- | --- | --- | --- | --- | --- | --- | --- |
| **Correlation** | **p-value** | **Correlation** | **p-value** | **Z** | **p-value** | **pfdr** |
| Albumin | 49179 | -0.0215 | 1.86E-06 | -0.01412 | 1.16E-03 | -1.1786 | 2.39E-01 | 3.14E-01 |
| ALP | 53858 | 0.035645 | 1.29E-16 | 0.018591 | 7.72E-06 | 2.850606 | 4.36E-03 | 7.27E-03 |
| ALT | 53853 | 0.04156 | 4.99E-22 | 0.011123 | 7.47E-03 | 5.086832 | 3.64E-07 | 1.82E-06 |
| CRP | 53764 | 0.044532 | 5.13E-25 | 0.014035 | 7.43E-04 | 5.093572 | 3.51E-07 | 1.82E-06 |
| Cystatin_C | 53866 | 0.047288 | 4.72E-28 | 0.055315 | 1.87E-40 | -1.34422 | 1.79E-01 | 2.48E-01 |
| GGT | 53834 | 0.050416 | 1.20E-31 | 0.029035 | 2.86E-12 | 3.575969 | 3.49E-04 | 8.72E-04 |
| HbA1c | 53608 | 0.034981 | 5.42E-16 | 0.032599 | 5.43E-15 | 0.397243 | 6.91E-01 | 7.20E-01 |
| HCT | 54967 | 0.008868 | 3.76E-02 | 0.026457 | 1.33E-10 | -2.96721 | 3.01E-03 | 6.18E-03 |
| HDL_C | 49162 | -0.06555 | 5.86E-48 | -0.02619 | 1.68E-09 | -6.29825 | 3.01E-10 | 2.51E-09 |
| HGB | 54967 | 0.009649 | 2.37E-02 | 0.026979 | 5.75E-11 | -2.92347 | 3.46E-03 | 6.18E-03 |
| HLSR_Percentage | 53900 | 0.036404 | 2.81E-17 | -0.00332 | 4.25E-01 | 6.637208 | 3.20E-11 | 4.00E-10 |
| IGF_1 | 53587 | -0.0246 | 1.23E-08 | -0.0237 | 1.30E-08 | -0.1506 | 8.80E-01 | 8.80E-01 |
| IRF | 53900 | 0.02914 | 1.32E-11 | 0.001599 | 7.01E-01 | 4.601159 | 4.20E-06 | 1.50E-05 |
| Lymph_Percentage | 54861 | -0.02164 | 4.01E-07 | -0.02829 | 6.76E-12 | 1.121375 | 2.62E-01 | 3.28E-01 |
| MPV | 54965 | -0.02435 | 1.14E-08 | -0.01199 | 3.61E-03 | -2.0847 | 3.71E-02 | 5.80E-02 |
| Neut_Count | 54861 | 0.043614 | 1.61E-24 | 0.025736 | 4.30E-10 | 3.015684 | 2.56E-03 | 5.83E-03 |
| Neut_Percentage | 54861 | 0.023407 | 4.18E-08 | 0.019021 | 3.95E-06 | 0.739278 | 4.60E-01 | 5.22E-01 |
| Platelet_Count | 54966 | 0.020858 | 1.01E-06 | -0.00361 | 3.81E-01 | 4.126399 | 3.68E-05 | 1.15E-04 |
| RBC_Count | 54967 | 0.008109 | 5.73E-02 | 0.013261 | 1.29E-03 | -0.86884 | 3.85E-01 | 4.58E-01 |
| RDW | 54967 | 0.013292 | 1.83E-03 | 0.004952 | 2.29E-01 | 1.406518 | 1.60E-01 | 2.35E-01 |
| TG | 53813 | 0.069383 | 2.03E-58 | 0.029535 | 1.21E-12 | 6.669938 | 2.56E-11 | 4.00E-10 |
| Total_Bili | 53635 | -0.02716 | 3.17E-10 | -0.00949 | 2.27E-02 | -2.9457 | 3.22E-03 | 6.18E-03 |
| Total_Protein | 49128 | -0.01194 | 8.14E-03 | -0.01458 | 7.99E-04 | 0.421246 | 6.74E-01 | 7.20E-01 |
| Vitamin_D | 51565 | -0.06743 | 4.87E-53 | -0.0369 | 3.29E-18 | -5.00698 | 5.53E-07 | 2.30E-06 |
| WBC_Count | 54967 | 0.042413 | 2.57E-23 | 0.019803 | 1.53E-06 | 3.816614 | 1.35E-04 | 3.76E-04 |

To assess whether resilience moderates the relationship between blood parameters and affective symptoms by comparing resilient and vulnerable groups, correlation analyses were conducted at baseline. Pearson correlation coefficients and p-values are reported for blood parameters with PHQ-4 scores in each group, with cocor tests evaluating differences in correlations between groups.

**Table S27: Correlations of plasma proteins with trauma exposure, affective disorder, and resilience**

| **Biomarker** | **N** | **Trauma exposure** | | | **Affective disorders** | | | **Resilience** | | |
| --- | --- | --- | --- | --- | --- | --- | --- | --- | --- | --- |
| **r** | **p** | **pfdr** | **r** | **p** | **pfdr** | **r** | **p** | **pfdr** |
| ACE2 | 15379 | 2.32E-02 | 3.99E-03 | 4.67E-02 | 3.21E-02 | 7.07E-05 | 1.24E-03 | -1.78E-02 | 2.74E-02 | 3.14E-01 |
| ACVRL1 | 15505 | 3.18E-02 | 7.59E-05 | 3.04E-03 | 2.51E-02 | 1.79E-03 | 1.72E-02 | -1.53E-02 | 5.72E-02 | 4.37E-01 |
| ADAMTS8 | 15697 | -3.56E-02 | 8.19E-06 | 7.46E-04 | -5.30E-02 | 3.11E-11 | 6.98E-09 | 2.64E-04 | 9.74E-01 | 9.95E-01 |
| ADM | 15772 | 3.20E-02 | 6.05E-05 | 2.60E-03 | 4.85E-02 | 1.14E-09 | 1.52E-07 | -2.06E-02 | 9.86E-03 | 2.08E-01 |
| AGR3 | 15240 | 2.46E-02 | 2.38E-03 | 3.35E-02 | 2.92E-02 | 3.19E-04 | 4.24E-03 | -5.53E-03 | 4.95E-01 | 9.22E-01 |
| AGRN | 15703 | 3.33E-02 | 3.09E-05 | 1.74E-03 | 3.45E-02 | 1.56E-05 | 3.56E-04 | -2.43E-02 | 2.37E-03 | 9.11E-02 |
| AGXT | 15646 | 2.76E-02 | 5.68E-04 | 1.29E-02 | 3.00E-02 | 1.76E-04 | 2.60E-03 | -2.34E-02 | 3.42E-03 | 1.20E-01 |
| AIFM1 | 15538 | 2.36E-02 | 3.27E-03 | 4.09E-02 | 2.42E-02 | 2.54E-03 | 2.23E-02 | -1.14E-02 | 1.56E-01 | 6.58E-01 |
| AKR7L | 12846 | 2.68E-02 | 2.39E-03 | 3.35E-02 | 2.81E-02 | 1.46E-03 | 1.47E-02 | -1.74E-02 | 4.93E-02 | 4.11E-01 |
| ALDH1A1 | 15642 | 2.47E-02 | 1.99E-03 | 2.96E-02 | 2.52E-02 | 1.65E-03 | 1.61E-02 | -6.51E-03 | 4.16E-01 | 8.86E-01 |
| AMBP | 15752 | 4.17E-02 | 1.63E-07 | 6.80E-05 | 3.69E-02 | 3.71E-06 | 1.07E-04 | -1.40E-02 | 7.82E-02 | 5.04E-01 |
| AMN | 15336 | 2.70E-02 | 8.35E-04 | 1.75E-02 | 3.31E-02 | 4.12E-05 | 8.03E-04 | -9.80E-03 | 2.26E-01 | 7.34E-01 |
| ANXA10 | 15286 | 2.53E-02 | 1.77E-03 | 2.73E-02 | 3.80E-02 | 2.62E-06 | 8.09E-05 | -4.74E-03 | 5.58E-01 | 9.37E-01 |
| ASGR1 | 15528 | 4.49E-02 | 2.16E-08 | 1.58E-05 | 6.24E-02 | 7.70E-15 | 3.75E-12 | -2.80E-02 | 4.80E-04 | 4.21E-02 |
| ASGR2 | 13246 | 3.11E-02 | 3.53E-04 | 9.14E-03 | 4.00E-02 | 4.21E-06 | 1.19E-04 | 3.60E-03 | 6.79E-01 | 9.59E-01 |
| ATRAID | 13175 | 2.81E-02 | 1.29E-03 | 2.29E-02 | 2.52E-02 | 3.90E-03 | 3.14E-02 | -1.69E-02 | 5.26E-02 | 4.21E-01 |
| B2M | 13251 | 3.42E-02 | 8.26E-05 | 3.18E-03 | 2.68E-02 | 2.05E-03 | 1.92E-02 | -1.17E-02 | 1.80E-01 | 6.76E-01 |
| BPIFB2 | 13218 | 2.83E-02 | 1.16E-03 | 2.19E-02 | 2.82E-02 | 1.22E-03 | 1.27E-02 | -1.95E-03 | 8.23E-01 | 9.78E-01 |
| BST2 | 15809 | 2.59E-02 | 1.16E-03 | 2.19E-02 | 2.97E-02 | 1.94E-04 | 2.79E-03 | -9.57E-03 | 2.29E-01 | 7.36E-01 |
| BTN2A1 | 15703 | 2.74E-02 | 6.12E-04 | 1.36E-02 | 3.32E-02 | 3.14E-05 | 6.42E-04 | -8.35E-03 | 2.96E-01 | 8.08E-01 |
| BTN3A2 | 15635 | 2.53E-02 | 1.55E-03 | 2.49E-02 | 2.46E-02 | 2.10E-03 | 1.94E-02 | -1.28E-02 | 1.09E-01 | 5.70E-01 |
| CA14 | 15772 | -2.54E-02 | 1.43E-03 | 2.38E-02 | -6.64E-02 | 7.31E-17 | 7.11E-14 | 2.11E-02 | 7.97E-03 | 1.81E-01 |
| CA5A | 15379 | 2.58E-02 | 1.41E-03 | 2.37E-02 | 2.17E-02 | 7.16E-03 | 4.99E-02 | -1.91E-02 | 1.81E-02 | 2.62E-01 |
| CA6 | 15597 | -3.32E-02 | 3.37E-05 | 1.85E-03 | -4.90E-02 | 9.17E-10 | 1.34E-07 | 2.44E-02 | 2.35E-03 | 9.11E-02 |
| CCL11 | 15825 | 2.75E-02 | 5.56E-04 | 1.27E-02 | 3.92E-02 | 8.16E-07 | 3.45E-05 | -1.77E-02 | 2.59E-02 | 3.09E-01 |
| CCL3 | 15635 | 2.65E-02 | 9.36E-04 | 1.88E-02 | 2.21E-02 | 5.66E-03 | 4.29E-02 | 3.81E-03 | 6.34E-01 | 9.48E-01 |
| CD302 | 15567 | 2.43E-02 | 2.41E-03 | 3.35E-02 | 4.72E-02 | 3.98E-09 | 4.47E-07 | -1.28E-02 | 1.10E-01 | 5.74E-01 |
| CD74 | 15809 | 3.03E-02 | 1.37E-04 | 4.72E-03 | 2.34E-02 | 3.26E-03 | 2.74E-02 | -1.00E-02 | 2.08E-01 | 7.07E-01 |
| CD99L2 | 15642 | 3.43E-02 | 1.85E-05 | 1.26E-03 | 3.25E-02 | 4.75E-05 | 8.88E-04 | 7.84E-04 | 9.22E-01 | 9.89E-01 |
| CDCP1 | 15528 | 2.77E-02 | 5.58E-04 | 1.27E-02 | 4.61E-02 | 9.42E-09 | 9.16E-07 | -1.98E-02 | 1.39E-02 | 2.25E-01 |
| CFH | 12434 | 3.57E-02 | 7.04E-05 | 2.94E-03 | 4.07E-02 | 5.64E-06 | 1.48E-04 | -1.76E-02 | 5.06E-02 | 4.13E-01 |
| CGREF1 | 15646 | 3.25E-02 | 4.82E-05 | 2.29E-03 | 3.82E-02 | 1.76E-06 | 6.12E-05 | -1.18E-02 | 1.40E-01 | 6.33E-01 |
| CHCHD10 | 13215 | 3.88E-02 | 8.43E-06 | 7.46E-04 | 3.06E-02 | 4.47E-04 | 5.53E-03 | -1.16E-02 | 1.84E-01 | 6.79E-01 |
| CHGA | 13229 | 3.00E-02 | 5.75E-04 | 1.29E-02 | 5.95E-02 | 7.89E-12 | 1.92E-09 | -1.77E-02 | 4.24E-02 | 3.90E-01 |
| CKAP4 | 15754 | 4.06E-02 | 3.59E-07 | 1.09E-04 | 4.11E-02 | 2.59E-07 | 1.38E-05 | -1.15E-02 | 1.50E-01 | 6.52E-01 |
| CKMT1A_CKMT1B | 15579 | 2.39E-02 | 2.88E-03 | 3.77E-02 | 2.41E-02 | 2.63E-03 | 2.28E-02 | 3.95E-03 | 6.22E-01 | 9.46E-01 |
| CLMP | 15772 | 2.32E-02 | 3.59E-03 | 4.37E-02 | 2.31E-02 | 3.71E-03 | 3.03E-02 | -1.82E-02 | 2.21E-02 | 2.88E-01 |
| CNTN1 | 15833 | -3.51E-02 | 9.91E-06 | 8.04E-04 | -4.02E-02 | 4.18E-07 | 2.01E-05 | 2.26E-03 | 7.76E-01 | 9.72E-01 |
| COL18A1 | 15706 | 4.06E-02 | 3.73E-07 | 1.09E-04 | 2.50E-02 | 1.74E-03 | 1.68E-02 | -5.51E-03 | 4.91E-01 | 9.22E-01 |
| COLEC12 | 15627 | 3.74E-02 | 2.94E-06 | 3.74E-04 | 2.74E-02 | 6.27E-04 | 7.24E-03 | -1.89E-02 | 1.80E-02 | 2.62E-01 |
| CPM | 15733 | 2.39E-02 | 2.75E-03 | 3.68E-02 | 3.71E-02 | 3.26E-06 | 9.71E-05 | -2.55E-02 | 1.40E-03 | 6.89E-02 |
| CRISP2 | 15772 | -2.50E-02 | 1.68E-03 | 2.64E-02 | -2.45E-02 | 2.09E-03 | 1.94E-02 | 1.30E-02 | 1.03E-01 | 5.50E-01 |
| CSF1 | 15703 | 3.63E-02 | 5.43E-06 | 5.59E-04 | 3.92E-02 | 9.41E-07 | 3.87E-05 | -2.12E-02 | 7.87E-03 | 1.81E-01 |
| CST3 | 15678 | 4.01E-02 | 5.06E-07 | 1.14E-04 | 2.96E-02 | 2.14E-04 | 3.02E-03 | -1.56E-02 | 5.03E-02 | 4.12E-01 |
| CSTB | 15445 | 3.19E-02 | 7.56E-05 | 3.04E-03 | 3.31E-02 | 3.91E-05 | 7.83E-04 | -1.77E-02 | 2.84E-02 | 3.17E-01 |
| CTSO | 15825 | 2.65E-02 | 8.46E-04 | 1.77E-02 | 2.74E-02 | 5.70E-04 | 6.73E-03 | -8.44E-03 | 2.89E-01 | 8.05E-01 |
| CTSZ | 15647 | 3.54E-02 | 9.65E-06 | 8.04E-04 | 3.44E-02 | 1.72E-05 | 3.87E-04 | -2.36E-02 | 3.17E-03 | 1.14E-01 |
| CXADR | 15635 | 2.32E-02 | 3.78E-03 | 4.50E-02 | 3.87E-02 | 1.34E-06 | 5.03E-05 | -2.65E-02 | 9.27E-04 | 5.64E-02 |
| CXCL16 | 15804 | 3.03E-02 | 1.38E-04 | 4.72E-03 | 4.86E-02 | 1.05E-09 | 1.46E-07 | -3.52E-02 | 9.94E-06 | 3.69E-03 |
| CXCL17 | 15825 | 3.13E-02 | 8.18E-05 | 3.18E-03 | 5.64E-02 | 1.31E-12 | 3.48E-10 | -6.60E-03 | 4.07E-01 | 8.82E-01 |
| DDAH1 | 15567 | 2.57E-02 | 1.38E-03 | 2.36E-02 | 3.21E-02 | 6.14E-05 | 1.10E-03 | -6.58E-03 | 4.12E-01 | 8.83E-01 |
| DPY30 | 15729 | 2.92E-02 | 2.54E-04 | 7.24E-03 | 2.23E-02 | 5.17E-03 | 3.98E-02 | -4.81E-03 | 5.47E-01 | 9.34E-01 |
| EFNA1 | 15615 | 4.53E-02 | 1.57E-08 | 1.52E-05 | 2.66E-02 | 8.78E-04 | 9.53E-03 | -8.21E-03 | 3.06E-01 | 8.14E-01 |
| EFNA4 | 15505 | 3.83E-02 | 1.86E-06 | 2.59E-04 | 3.64E-02 | 5.85E-06 | 1.53E-04 | -1.97E-02 | 1.42E-02 | 2.28E-01 |
| EGFR | 15833 | -2.57E-02 | 1.23E-03 | 2.25E-02 | -2.85E-02 | 3.44E-04 | 4.47E-03 | 1.13E-02 | 1.54E-01 | 6.55E-01 |
| ENPP7 | 15132 | 2.65E-02 | 1.13E-03 | 2.15E-02 | 3.05E-02 | 1.81E-04 | 2.63E-03 | -1.69E-03 | 8.35E-01 | 9.80E-01 |
| EPHA1 | 15683 | 3.43E-02 | 1.76E-05 | 1.23E-03 | 3.43E-02 | 1.81E-05 | 4.03E-04 | -2.14E-02 | 7.39E-03 | 1.80E-01 |
| EPHA2 | 15063 | 3.10E-02 | 1.42E-04 | 4.83E-03 | 2.39E-02 | 3.38E-03 | 2.83E-02 | -2.56E-02 | 1.72E-03 | 7.77E-02 |
| EPS8L2 | 15747 | 3.01E-02 | 1.57E-04 | 5.28E-03 | 3.64E-02 | 5.10E-06 | 1.35E-04 | -2.54E-02 | 1.43E-03 | 6.89E-02 |
| EZR | 15809 | 2.43E-02 | 2.31E-03 | 3.30E-02 | 2.31E-02 | 3.65E-03 | 2.99E-02 | -1.04E-02 | 1.92E-01 | 6.85E-01 |
| F7 | 15676 | 3.27E-02 | 4.20E-05 | 2.15E-03 | 4.22E-02 | 1.24E-07 | 7.57E-06 | -9.06E-03 | 2.57E-01 | 7.68E-01 |
| F9 | 15678 | 2.28E-02 | 4.33E-03 | 4.89E-02 | 2.97E-02 | 2.06E-04 | 2.94E-03 | 2.01E-03 | 8.02E-01 | 9.75E-01 |
| FABP1 | 15627 | 4.96E-02 | 5.56E-10 | 8.11E-07 | 4.08E-02 | 3.33E-07 | 1.74E-05 | -1.84E-02 | 2.18E-02 | 2.88E-01 |
| FABP4 | 15833 | 2.93E-02 | 2.28E-04 | 6.80E-03 | 4.10E-02 | 2.48E-07 | 1.34E-05 | -1.78E-02 | 2.52E-02 | 3.07E-01 |
| FAM3C | 15625 | 3.95E-02 | 8.25E-07 | 1.53E-04 | 3.68E-02 | 4.29E-06 | 1.20E-04 | -1.58E-02 | 4.83E-02 | 4.08E-01 |
| FGFR4 | 12949 | 2.96E-02 | 2.06E-04 | 6.35E-03 | 4.53E-02 | 1.36E-08 | 1.22E-06 | -2.48E-02 | 1.91E-03 | 8.13E-02 |
| FSTL3 | 15613 | 3.68E-02 | 4.34E-06 | 4.87E-04 | 4.55E-02 | 1.37E-08 | 1.22E-06 | -2.02E-02 | 1.16E-02 | 2.12E-01 |
| FUOM | 12949 | 2.88E-02 | 1.06E-03 | 2.06E-02 | 3.24E-02 | 2.33E-04 | 3.24E-03 | -1.95E-02 | 2.66E-02 | 3.11E-01 |
| FURIN | 15697 | 3.38E-02 | 2.32E-05 | 1.41E-03 | 4.04E-02 | 4.28E-07 | 2.01E-05 | -1.26E-02 | 1.14E-01 | 5.76E-01 |
| GAST | 13215 | 2.88E-02 | 9.25E-04 | 1.88E-02 | 7.80E-02 | 3.10E-19 | 9.05E-16 | -2.70E-02 | 1.92E-03 | 8.13E-02 |
| GCHFR | 12638 | 3.78E-02 | 2.14E-05 | 1.36E-03 | 4.87E-02 | 4.59E-08 | 3.53E-06 | -1.25E-02 | 1.60E-01 | 6.66E-01 |
| GDF15 | 15833 | 4.11E-02 | 2.37E-07 | 8.67E-05 | 6.50E-02 | 2.96E-16 | 1.73E-13 | -1.35E-02 | 9.06E-02 | 5.35E-01 |
| GFRA1 | 15754 | 3.79E-02 | 1.98E-06 | 2.63E-04 | 4.27E-02 | 8.53E-08 | 5.79E-06 | -2.88E-02 | 3.00E-04 | 3.50E-02 |
| GGH | 15365 | 2.36E-02 | 3.43E-03 | 4.23E-02 | 3.64E-02 | 6.69E-06 | 1.70E-04 | -2.86E-02 | 3.90E-04 | 4.19E-02 |
| GLB1 | 15528 | 2.83E-02 | 4.29E-04 | 1.06E-02 | 3.12E-02 | 1.02E-04 | 1.69E-03 | 2.73E-03 | 7.34E-01 | 9.70E-01 |
| GRPEL1 | 15567 | 4.24E-02 | 1.27E-07 | 6.20E-05 | 3.80E-02 | 2.11E-06 | 7.08E-05 | -1.76E-02 | 2.85E-02 | 3.18E-01 |
| GSTA1 | 15608 | 2.44E-02 | 2.28E-03 | 3.29E-02 | 3.61E-02 | 6.72E-06 | 1.70E-04 | -2.09E-02 | 8.94E-03 | 1.96E-01 |
| GUSB | 15688 | 2.72E-02 | 6.70E-04 | 1.45E-02 | 4.53E-02 | 1.42E-08 | 1.22E-06 | -1.32E-02 | 9.77E-02 | 5.46E-01 |
| HAVCR1 | 15752 | 3.41E-02 | 1.95E-05 | 1.29E-03 | 3.13E-02 | 8.85E-05 | 1.49E-03 | -1.51E-02 | 5.77E-02 | 4.38E-01 |
| HAVCR2 | 15642 | 2.78E-02 | 5.08E-04 | 1.21E-02 | 3.86E-02 | 1.40E-06 | 5.12E-05 | -2.37E-02 | 3.01E-03 | 1.10E-01 |
| HNMT | 15459 | 3.93E-02 | 1.03E-06 | 1.66E-04 | 3.02E-02 | 1.72E-04 | 2.58E-03 | -6.30E-03 | 4.34E-01 | 9.00E-01 |
| IFI30 | 12857 | 4.35E-02 | 8.38E-07 | 1.53E-04 | 4.81E-02 | 5.11E-08 | 3.83E-06 | -2.51E-02 | 4.43E-03 | 1.42E-01 |
| IFNG | 15336 | 2.65E-02 | 1.05E-03 | 2.06E-02 | 2.35E-02 | 3.67E-03 | 3.00E-02 | 4.89E-03 | 5.45E-01 | 9.34E-01 |
| IGFBP4 | 15461 | 5.68E-02 | 1.62E-12 | 4.74E-09 | 3.81E-02 | 2.17E-06 | 7.22E-05 | -7.30E-03 | 3.65E-01 | 8.59E-01 |
| IGSF21 | 12866 | -3.39E-02 | 1.21E-04 | 4.26E-03 | -3.64E-02 | 3.72E-05 | 7.50E-04 | 6.78E-03 | 4.43E-01 | 9.00E-01 |
| IGSF8 | 15646 | 2.83E-02 | 3.99E-04 | 1.00E-02 | 3.78E-02 | 2.27E-06 | 7.37E-05 | -1.83E-02 | 2.26E-02 | 2.89E-01 |
| IL10RB | 15703 | 2.76E-02 | 5.41E-04 | 1.25E-02 | 2.41E-02 | 2.51E-03 | 2.22E-02 | -2.22E-02 | 5.39E-03 | 1.56E-01 |
| IL15 | 15635 | 2.87E-02 | 3.39E-04 | 9.01E-03 | 5.22E-02 | 7.07E-11 | 1.47E-08 | -8.79E-04 | 9.13E-01 | 9.89E-01 |
| IL18BP | 15701 | 2.64E-02 | 9.27E-04 | 1.88E-02 | 3.65E-02 | 4.84E-06 | 1.31E-04 | -2.20E-02 | 5.97E-03 | 1.66E-01 |
| IL4R | 15635 | 2.56E-02 | 1.41E-03 | 2.37E-02 | 2.51E-02 | 1.71E-03 | 1.66E-02 | -1.78E-02 | 2.61E-02 | 3.09E-01 |
| INHBC | 15642 | 3.23E-02 | 5.45E-05 | 2.38E-03 | 3.73E-02 | 3.13E-06 | 9.44E-05 | -2.90E-03 | 7.17E-01 | 9.67E-01 |
| ISM1 | 15635 | 2.29E-02 | 4.20E-03 | 4.79E-02 | 4.32E-02 | 6.81E-08 | 4.94E-06 | -2.05E-02 | 1.05E-02 | 2.12E-01 |
| ITGA11 | 15635 | -2.31E-02 | 3.82E-03 | 4.54E-02 | -3.84E-02 | 1.60E-06 | 5.78E-05 | 1.07E-02 | 1.80E-01 | 6.76E-01 |
| ITGAV | 15772 | -2.48E-02 | 1.85E-03 | 2.80E-02 | -4.61E-02 | 7.23E-09 | 7.54E-07 | 1.82E-02 | 2.27E-02 | 2.89E-01 |
| KIT | 15678 | -2.32E-02 | 3.73E-03 | 4.49E-02 | -2.33E-02 | 3.62E-03 | 2.98E-02 | 2.45E-02 | 2.17E-03 | 8.76E-02 |
| KLF4 | 12832 | 2.60E-02 | 3.29E-03 | 4.09E-02 | 3.13E-02 | 3.96E-04 | 4.98E-03 | -9.78E-03 | 2.69E-01 | 7.78E-01 |
| KRT18 | 15567 | 3.16E-02 | 8.17E-05 | 3.18E-03 | 4.03E-02 | 4.98E-07 | 2.27E-05 | -1.79E-02 | 2.55E-02 | 3.09E-01 |
| LAIR1 | 15627 | 3.89E-02 | 1.16E-06 | 1.79E-04 | 2.21E-02 | 5.84E-03 | 4.34E-02 | -7.80E-03 | 3.30E-01 | 8.31E-01 |
| LAMP3 | 15808 | 2.28E-02 | 4.23E-03 | 4.80E-02 | 4.99E-02 | 3.64E-10 | 6.63E-08 | -1.56E-02 | 5.04E-02 | 4.12E-01 |
| LAYN | 15499 | 2.54E-02 | 1.60E-03 | 2.56E-02 | 2.86E-02 | 3.82E-04 | 4.82E-03 | -2.10E-02 | 9.05E-03 | 1.97E-01 |
| LEP | 15646 | 2.28E-02 | 4.43E-03 | 4.96E-02 | 3.97E-02 | 6.85E-07 | 3.03E-05 | -2.25E-02 | 4.90E-03 | 1.48E-01 |
| LGALS1 | 15646 | 2.97E-02 | 2.04E-04 | 6.35E-03 | 2.58E-02 | 1.25E-03 | 1.29E-02 | -3.98E-03 | 6.19E-01 | 9.45E-01 |
| LGALS4 | 15627 | 3.01E-02 | 1.73E-04 | 5.67E-03 | 4.91E-02 | 8.64E-10 | 1.33E-07 | -3.69E-02 | 3.93E-06 | 2.87E-03 |
| LGALS9 | 15625 | 3.92E-02 | 9.87E-07 | 1.66E-04 | 3.00E-02 | 1.82E-04 | 2.63E-03 | -1.91E-02 | 1.70E-02 | 2.55E-01 |
| LILRB4 | 15336 | 2.82E-02 | 4.93E-04 | 1.18E-02 | 2.84E-02 | 4.33E-04 | 5.40E-03 | 2.00E-03 | 8.04E-01 | 9.75E-01 |
| LRP11 | 15646 | 2.57E-02 | 1.32E-03 | 2.32E-02 | 3.35E-02 | 2.88E-05 | 6.01E-04 | -3.53E-02 | 1.01E-05 | 3.69E-03 |
| LTBR | 15554 | 3.34E-02 | 3.08E-05 | 1.74E-03 | 2.82E-02 | 4.50E-04 | 5.54E-03 | -4.18E-03 | 6.02E-01 | 9.44E-01 |
| MAMDC2 | 13243 | 2.90E-02 | 8.67E-04 | 1.80E-02 | 3.02E-02 | 5.12E-04 | 6.15E-03 | -3.91E-03 | 6.53E-01 | 9.52E-01 |
| MFGE8 | 15642 | 2.52E-02 | 1.62E-03 | 2.56E-02 | 3.62E-02 | 6.21E-06 | 1.60E-04 | -1.79E-02 | 2.52E-02 | 3.07E-01 |
| MOG | 15772 | 2.43E-02 | 2.32E-03 | 3.30E-02 | 2.15E-02 | 7.11E-03 | 4.99E-02 | -1.34E-02 | 9.24E-02 | 5.39E-01 |
| MRC1 | 13246 | 2.57E-02 | 3.12E-03 | 4.00E-02 | 4.60E-02 | 1.20E-07 | 7.49E-06 | -2.34E-02 | 7.01E-03 | 1.78E-01 |
| NBL1 | 15697 | 3.36E-02 | 2.55E-05 | 1.52E-03 | 2.87E-02 | 3.30E-04 | 4.35E-03 | -1.66E-02 | 3.78E-02 | 3.65E-01 |
| NCAM2 | 15642 | -2.31E-02 | 3.94E-03 | 4.62E-02 | -2.79E-02 | 4.89E-04 | 5.92E-03 | 3.21E-03 | 6.88E-01 | 9.61E-01 |
| NECTIN2 | 15625 | 2.81E-02 | 4.43E-04 | 1.09E-02 | 4.18E-02 | 1.81E-07 | 1.06E-05 | -2.02E-02 | 1.16E-02 | 2.12E-01 |
| NOMO1 | 15642 | 3.23E-02 | 5.45E-05 | 2.38E-03 | 2.18E-02 | 6.48E-03 | 4.70E-02 | -6.02E-03 | 4.52E-01 | 9.06E-01 |
| NPDC1 | 15646 | 2.97E-02 | 2.07E-04 | 6.35E-03 | 2.37E-02 | 3.02E-03 | 2.56E-02 | -3.30E-02 | 3.76E-05 | 1.04E-02 |
| NTRK3 | 15809 | -2.57E-02 | 1.22E-03 | 2.25E-02 | -4.37E-02 | 3.94E-08 | 3.29E-06 | 5.06E-03 | 5.25E-01 | 9.26E-01 |
| OCLN | 13222 | 3.91E-02 | 7.16E-06 | 6.75E-04 | 6.50E-02 | 7.66E-14 | 3.20E-11 | -2.92E-02 | 7.84E-04 | 4.98E-02 |
| PALM2 | 13215 | 2.68E-02 | 2.07E-03 | 3.06E-02 | 2.92E-02 | 7.93E-04 | 8.67E-03 | -2.94E-02 | 7.48E-04 | 4.92E-02 |
| PCBD1 | 12921 | 3.46E-02 | 8.47E-05 | 3.21E-03 | 4.57E-02 | 2.13E-07 | 1.20E-05 | -1.82E-02 | 3.89E-02 | 3.70E-01 |
| PCSK9 | 15833 | 4.31E-02 | 5.87E-08 | 3.43E-05 | 4.15E-02 | 1.85E-07 | 1.06E-05 | -1.29E-02 | 1.05E-01 | 5.56E-01 |
| PGF | 15825 | 3.29E-02 | 3.55E-05 | 1.92E-03 | 2.69E-02 | 7.37E-04 | 8.15E-03 | -1.39E-02 | 7.98E-02 | 5.04E-01 |
| PIGR | 15451 | 3.72E-02 | 3.85E-06 | 4.49E-04 | 6.78E-02 | 3.52E-17 | 5.14E-14 | -2.75E-02 | 6.31E-04 | 4.73E-02 |
| PIK3IP1 | 15642 | 2.82E-02 | 4.27E-04 | 1.06E-02 | 2.17E-02 | 6.74E-03 | 4.79E-02 | -6.40E-03 | 4.24E-01 | 8.90E-01 |
| PLA2G15 | 15697 | 3.47E-02 | 1.39E-05 | 1.07E-03 | 4.20E-02 | 1.49E-07 | 8.86E-06 | -1.67E-02 | 3.61E-02 | 3.57E-01 |
| PLAU | 15642 | -2.56E-02 | 1.37E-03 | 2.36E-02 | -2.80E-02 | 4.68E-04 | 5.75E-03 | -2.44E-03 | 7.61E-01 | 9.71E-01 |
| PLAUR | 15526 | 2.59E-02 | 1.25E-03 | 2.25E-02 | 4.08E-02 | 3.79E-07 | 1.88E-05 | -1.26E-02 | 1.18E-01 | 5.84E-01 |
| PLTP | 15779 | -2.50E-02 | 1.74E-03 | 2.70E-02 | -3.86E-02 | 1.26E-06 | 4.83E-05 | -8.31E-04 | 9.17E-01 | 9.89E-01 |
| PRAP1 | 13229 | 2.72E-02 | 1.78E-03 | 2.73E-02 | 5.17E-02 | 2.73E-09 | 3.19E-07 | -1.57E-02 | 7.22E-02 | 4.93E-01 |
| PRG3 | 13229 | -2.49E-02 | 4.15E-03 | 4.77E-02 | -2.74E-02 | 1.64E-03 | 1.61E-02 | 1.09E-02 | 2.09E-01 | 7.07E-01 |
| PROC | 15678 | 2.97E-02 | 2.01E-04 | 6.35E-03 | 2.93E-02 | 2.41E-04 | 3.33E-03 | -1.14E-03 | 8.87E-01 | 9.87E-01 |
| PRSS2 | 15701 | 2.80E-02 | 4.61E-04 | 1.12E-02 | 2.88E-02 | 3.15E-04 | 4.20E-03 | -9.21E-03 | 2.49E-01 | 7.59E-01 |
| PRSS8 | 15579 | 2.70E-02 | 7.61E-04 | 1.62E-02 | 5.91E-02 | 1.63E-13 | 5.97E-11 | -1.95E-02 | 1.49E-02 | 2.34E-01 |
| PTGDS | 15516 | 2.48E-02 | 2.03E-03 | 3.01E-02 | 2.98E-02 | 2.09E-04 | 2.96E-03 | -3.01E-02 | 1.80E-04 | 2.89E-02 |
| PTPRN2 | 15471 | 3.21E-02 | 6.62E-05 | 2.80E-03 | 2.28E-02 | 4.66E-03 | 3.66E-02 | -1.93E-02 | 1.64E-02 | 2.47E-01 |
| RARRES2 | 15728 | 3.65E-02 | 4.87E-06 | 5.26E-04 | 4.36E-02 | 4.51E-08 | 3.53E-06 | -2.48E-02 | 1.86E-03 | 8.13E-02 |
| RBFOX3 | 13222 | 3.17E-02 | 2.73E-04 | 7.65E-03 | 3.69E-02 | 2.24E-05 | 4.85E-04 | -9.58E-03 | 2.71E-01 | 7.81E-01 |
| RBP5 | 15567 | 3.25E-02 | 5.19E-05 | 2.37E-03 | 3.44E-02 | 1.84E-05 | 4.07E-04 | -7.64E-03 | 3.41E-01 | 8.41E-01 |
| REG3A | 15833 | 3.26E-02 | 4.19E-05 | 2.15E-03 | 2.96E-02 | 1.98E-04 | 2.84E-03 | 1.60E-03 | 8.40E-01 | 9.83E-01 |
| REG4 | 15653 | 3.54E-02 | 9.53E-06 | 8.04E-04 | 3.91E-02 | 1.03E-06 | 4.13E-05 | -9.70E-03 | 2.26E-01 | 7.34E-01 |
| RIDA | 12949 | 3.18E-02 | 2.99E-04 | 8.24E-03 | 2.90E-02 | 9.66E-04 | 1.04E-02 | -1.20E-02 | 1.74E-01 | 6.70E-01 |
| RNASE4 | 12809 | 2.66E-02 | 2.67E-03 | 3.64E-02 | 3.18E-02 | 3.22E-04 | 4.25E-03 | -1.61E-02 | 6.89E-02 | 4.84E-01 |
| RNASE6 | 13147 | 3.54E-02 | 4.94E-05 | 2.29E-03 | 4.65E-02 | 9.80E-08 | 6.36E-06 | -1.75E-02 | 4.56E-02 | 4.00E-01 |
| RTN4R | 15772 | 2.39E-02 | 2.73E-03 | 3.67E-02 | 2.19E-02 | 6.02E-03 | 4.44E-02 | -2.95E-02 | 2.09E-04 | 2.90E-02 |
| SCARB2 | 15226 | 3.65E-02 | 6.70E-06 | 6.52E-04 | 2.73E-02 | 7.55E-04 | 8.28E-03 | -2.62E-02 | 1.26E-03 | 6.67E-02 |
| SCG2 | 15715 | 2.72E-02 | 6.46E-04 | 1.43E-02 | 3.86E-02 | 1.34E-06 | 5.03E-05 | -1.48E-02 | 6.45E-02 | 4.66E-01 |
| SCLY | 15734 | 2.87E-02 | 3.17E-04 | 8.56E-03 | 2.25E-02 | 4.82E-03 | 3.74E-02 | -6.68E-03 | 4.03E-01 | 8.79E-01 |
| SELENOP | 13251 | -2.84E-02 | 1.10E-03 | 2.12E-02 | -4.61E-02 | 1.14E-07 | 7.21E-06 | 3.06E-02 | 4.27E-04 | 4.19E-02 |
| SHISA5 | 13229 | 2.95E-02 | 6.98E-04 | 1.50E-02 | 3.41E-02 | 9.03E-05 | 1.52E-03 | -1.98E-02 | 2.26E-02 | 2.89E-01 |
| SMOC1 | 15772 | 3.00E-02 | 1.66E-04 | 5.50E-03 | 4.52E-02 | 1.41E-08 | 1.22E-06 | -3.03E-02 | 1.45E-04 | 2.82E-02 |
| SPINK1 | 15642 | 3.97E-02 | 6.94E-07 | 1.45E-04 | 5.00E-02 | 4.18E-10 | 7.18E-08 | -6.85E-03 | 3.92E-01 | 8.76E-01 |
| SPON1 | 15653 | 2.79E-02 | 4.77E-04 | 1.15E-02 | 2.42E-02 | 2.48E-03 | 2.20E-02 | -1.52E-02 | 5.81E-02 | 4.39E-01 |
| SULT2A1 | 15635 | 2.42E-02 | 2.53E-03 | 3.48E-02 | 3.97E-02 | 7.09E-07 | 3.05E-05 | -6.92E-03 | 3.87E-01 | 8.76E-01 |
| TAFA5 | 15567 | 2.95E-02 | 2.35E-04 | 6.94E-03 | 3.29E-02 | 4.16E-05 | 8.04E-04 | -1.81E-02 | 2.42E-02 | 3.00E-01 |
| TFF1 | 15574 | 2.97E-02 | 2.10E-04 | 6.39E-03 | 3.67E-02 | 4.70E-06 | 1.28E-04 | 3.83E-04 | 9.62E-01 | 9.94E-01 |
| TGFBR2 | 15697 | 3.11E-02 | 9.83E-05 | 3.54E-03 | 4.06E-02 | 3.59E-07 | 1.84E-05 | -3.28E-02 | 3.93E-05 | 1.04E-02 |
| TNFRSF10A | 15528 | 3.51E-02 | 1.23E-05 | 9.69E-04 | 4.69E-02 | 5.21E-09 | 5.63E-07 | -2.59E-02 | 1.24E-03 | 6.67E-02 |
| TNFRSF10B | 15528 | 3.14E-02 | 9.39E-05 | 3.43E-03 | 3.09E-02 | 1.20E-04 | 1.90E-03 | -1.72E-02 | 3.19E-02 | 3.33E-01 |
| TNFRSF11A | 15825 | 3.15E-02 | 7.35E-05 | 3.02E-03 | 3.56E-02 | 7.60E-06 | 1.88E-04 | -2.77E-02 | 4.90E-04 | 4.21E-02 |
| TNFRSF12A | 15697 | 3.30E-02 | 3.63E-05 | 1.93E-03 | 2.99E-02 | 1.78E-04 | 2.61E-03 | -2.21E-02 | 5.62E-03 | 1.59E-01 |
| TNFRSF14 | 15653 | 3.46E-02 | 1.49E-05 | 1.12E-03 | 2.93E-02 | 2.54E-04 | 3.44E-03 | -1.48E-02 | 6.50E-02 | 4.68E-01 |
| TNFRSF1A | 15642 | 3.27E-02 | 4.45E-05 | 2.20E-03 | 2.92E-02 | 2.59E-04 | 3.50E-03 | -9.62E-03 | 2.29E-01 | 7.36E-01 |
| TNFRSF1B | 15642 | 3.46E-02 | 1.55E-05 | 1.13E-03 | 2.80E-02 | 4.75E-04 | 5.81E-03 | 3.89E-04 | 9.61E-01 | 9.94E-01 |
| TNFRSF4 | 15808 | 2.84E-02 | 3.52E-04 | 9.14E-03 | 2.18E-02 | 6.21E-03 | 4.55E-02 | -1.63E-02 | 4.12E-02 | 3.84E-01 |
| TNFRSF6B | 15528 | 2.57E-02 | 1.36E-03 | 2.36E-02 | 2.54E-02 | 1.58E-03 | 1.56E-02 | -1.45E-02 | 7.09E-02 | 4.92E-01 |
| TNFRSF9 | 15528 | 2.94E-02 | 2.56E-04 | 7.24E-03 | 2.49E-02 | 1.90E-03 | 1.81E-02 | -4.65E-03 | 5.62E-01 | 9.37E-01 |
| TNFSF13 | 15703 | 3.44E-02 | 1.68E-05 | 1.20E-03 | 3.54E-02 | 9.02E-06 | 2.18E-04 | -1.33E-02 | 9.70E-02 | 5.46E-01 |
| TNFSF13B | 15804 | 3.11E-02 | 9.18E-05 | 3.39E-03 | 4.36E-02 | 4.20E-08 | 3.40E-06 | -2.78E-02 | 4.85E-04 | 4.21E-02 |
| TREM2 | 15627 | 3.13E-02 | 9.03E-05 | 3.38E-03 | 3.76E-02 | 2.55E-06 | 8.09E-05 | -9.92E-03 | 2.15E-01 | 7.19E-01 |
| TSHB | 15646 | -2.69E-02 | 7.81E-04 | 1.65E-02 | -3.55E-02 | 8.87E-06 | 2.16E-04 | 1.76E-02 | 2.78E-02 | 3.16E-01 |
| ULBP2 | 15528 | 2.89E-02 | 3.16E-04 | 8.56E-03 | 2.47E-02 | 2.08E-03 | 1.93E-02 | -1.62E-02 | 4.31E-02 | 3.90E-01 |
| VEGFA | 15775 | 2.54E-02 | 1.45E-03 | 2.39E-02 | 2.16E-02 | 6.72E-03 | 4.79E-02 | 9.16E-04 | 9.08E-01 | 9.89E-01 |
| VSIG2 | 13166 | 3.25E-02 | 1.92E-04 | 6.24E-03 | 5.57E-02 | 1.68E-10 | 3.26E-08 | -2.35E-02 | 6.96E-03 | 1.78E-01 |
| VSIG4 | 15624 | 2.88E-02 | 3.24E-04 | 8.67E-03 | 2.82E-02 | 4.36E-04 | 5.42E-03 | -6.17E-03 | 4.41E-01 | 9.00E-01 |
| WFDC2 | 14827 | 3.81E-02 | 3.64E-06 | 4.43E-04 | 6.76E-02 | 1.76E-16 | 1.29E-13 | -2.20E-02 | 7.54E-03 | 1.80E-01 |
| ZBTB17 | 15379 | 3.37E-02 | 2.94E-05 | 1.72E-03 | 2.39E-02 | 3.01E-03 | 2.56E-02 | -2.05E-03 | 7.99E-01 | 9.75E-01 |

To identify plasma proteins significantly associated with both trauma exposure and affective symptoms, correlation analyses were performed at baseline. Only proteins showing significant correlations (FDR-corrected p < 0.05) with both trauma exposure and PHQ-4 scores are included, with their correlation coefficients, FDR-corrected p-values, and correlations with resilience reported in the table.

**Table S28: Mediation analysis of plasma proteins in the pathway from trauma exposure to affective disorder**

| **Biomarker** | **Estimate** | **CIlower** | **CIupper** | **p** | **Path a** | **pa** | **Path b** | **pb** | **Path c** | **pc** |
| --- | --- | --- | --- | --- | --- | --- | --- | --- | --- | --- |
| ACE2 | 1.61E-03 | 3.79E-04 | 3.43E-03 | 0.006 | 1.59E-02 | 3.28E-03 | 1.01E-01 | 4.49E-04 | 4.40E-01 | 2.17E-113 |
| ACVRL1 | 1.54E-03 | 2.06E-04 | 3.49E-03 | 0.02 | 1.11E-02 | 4.46E-05 | 1.39E-01 | 1.42E-02 | 4.45E-01 | 9.04E-117 |
| ADAMTS8 | 3.93E-03 | 2.00E-03 | 6.47E-03 | 0 | -2.34E-02 | 9.50E-06 | -1.68E-01 | 5.04E-09 | 4.40E-01 | 1.52E-116 |
| ADM | 3.48E-03 | 1.49E-03 | 5.90E-03 | 0 | 1.25E-02 | 3.21E-05 | 2.78E-01 | 3.12E-08 | 4.37E-01 | 3.48E-115 |
| AGR3 | 1.51E-03 | 3.42E-04 | 3.10E-03 | 0 | 2.20E-02 | 1.82E-03 | 6.86E-02 | 1.95E-03 | 4.30E-01 | 2.29E-108 |
| AGRN | 2.29E-03 | 8.27E-04 | 4.35E-03 | 0 | 1.54E-02 | 2.98E-05 | 1.49E-01 | 3.09E-04 | 4.40E-01 | 2.36E-116 |
| AGXT | 1.75E-03 | 3.98E-04 | 3.58E-03 | 0.002 | 3.15E-02 | 4.00E-04 | 5.55E-02 | 1.18E-03 | 4.38E-01 | 5.13E-115 |
| AIFM1 | 1.24E-03 | 2.20E-04 | 2.75E-03 | 0.014 | 3.77E-02 | 2.04E-03 | 3.30E-02 | 8.53E-03 | 4.34E-01 | 1.18E-112 |
| ALDH1A1 | 1.05E-03 | 2.92E-05 | 2.41E-03 | 0.046 | 1.93E-02 | 1.84E-03 | 5.45E-02 | 2.75E-02 | 4.39E-01 | 6.34E-115 |
| AMBP | 3.12E-03 | 1.29E-03 | 5.53E-03 | 0 | 1.20E-02 | 9.35E-08 | 2.61E-01 | 1.15E-04 | 4.36E-01 | 1.19E-114 |
| AMN | 1.82E-03 | 4.88E-04 | 3.49E-03 | 0.008 | 1.84E-02 | 1.06E-03 | 9.88E-02 | 3.66E-04 | 4.33E-01 | 8.94E-110 |
| ANXA10 | 2.10E-03 | 7.14E-04 | 4.13E-03 | 0.002 | 2.84E-02 | 1.87E-03 | 7.40E-02 | 1.66E-05 | 4.41E-01 | 6.96E-113 |
| APOF | 2.07E-03 | 3.26E-04 | 4.30E-03 | 0.014 | -6.68E-03 | 7.83E-03 | -3.10E-01 | 1.56E-05 | 4.39E-01 | 3.91E-98 |
| ASGR1 | 6.10E-03 | 3.45E-03 | 9.17E-03 | 0 | 1.93E-02 | 9.63E-09 | 3.16E-01 | 5.45E-12 | 4.42E-01 | 4.95E-115 |
| ASGR2 | 2.66E-03 | 8.92E-04 | 4.67E-03 | 0 | 1.08E-02 | 2.67E-04 | 2.46E-01 | 5.05E-05 | 4.39E-01 | 8.08E-98 |
| ATRAID | 1.34E-03 | 2.12E-04 | 2.83E-03 | 0.016 | 9.56E-03 | 1.56E-03 | 1.40E-01 | 1.93E-02 | 4.40E-01 | 1.45E-98 |
| B2M | 1.64E-03 | 3.37E-04 | 3.52E-03 | 0.016 | 1.35E-02 | 9.00E-05 | 1.22E-01 | 1.96E-02 | 4.39E-01 | 4.15E-98 |
| BPIFB2 | 1.54E-03 | 2.53E-04 | 3.24E-03 | 0.02 | 2.37E-02 | 1.23E-03 | 6.50E-02 | 8.30E-03 | 4.38E-01 | 2.14E-97 |
| BST2 | 1.62E-03 | 3.06E-04 | 3.37E-03 | 0.006 | 1.90E-02 | 9.96E-04 | 8.56E-02 | 1.08E-03 | 4.36E-01 | 6.53E-115 |
| BTN2A1 | 1.86E-03 | 5.78E-04 | 3.74E-03 | 0 | 9.69E-03 | 5.88E-04 | 1.92E-01 | 3.65E-04 | 4.41E-01 | 1.31E-116 |
| BTN3A2 | 1.29E-03 | 2.30E-04 | 2.70E-03 | 0.012 | 1.42E-02 | 1.18E-03 | 9.10E-02 | 8.96E-03 | 4.39E-01 | 1.19E-115 |
| CA14 | 3.85E-03 | 1.39E-03 | 6.59E-03 | 0 | -1.32E-02 | 1.28E-03 | -2.93E-01 | 2.44E-15 | 4.36E-01 | 2.86E-115 |
| CA6 | 3.50E-03 | 1.76E-03 | 5.93E-03 | 0 | -3.11E-02 | 3.01E-05 | -1.13E-01 | 4.51E-08 | 4.38E-01 | 8.25E-114 |
| CCL11 | 2.14E-03 | 8.23E-04 | 3.93E-03 | 0 | 1.53E-02 | 6.65E-04 | 1.40E-01 | 2.92E-05 | 4.38E-01 | 1.68E-116 |
| CCL3 | 1.16E-03 | 2.24E-05 | 2.64E-03 | 0.038 | 2.09E-02 | 8.33E-04 | 5.53E-02 | 2.30E-02 | 4.39E-01 | 1.06E-115 |
| CD302 | 2.47E-03 | 8.05E-04 | 4.73E-03 | 0.004 | 9.86E-03 | 2.71E-03 | 2.51E-01 | 7.08E-08 | 4.33E-01 | 1.50E-112 |
| CD74 | 1.31E-03 | 1.66E-04 | 2.80E-03 | 0.02 | 1.49E-02 | 1.33E-04 | 8.80E-02 | 2.29E-02 | 4.36E-01 | 5.26E-115 |
| CD83 | 2.38E-03 | 5.26E-04 | 4.64E-03 | 0.01 | 1.03E-02 | 5.60E-03 | 2.30E-01 | 1.72E-08 | 4.38E-01 | 2.71E-115 |
| CD99L2 | 2.19E-03 | 7.32E-04 | 4.26E-03 | 0 | 1.19E-02 | 1.58E-05 | 1.84E-01 | 9.32E-04 | 4.38E-01 | 2.49E-114 |
| CDCP1 | 3.14E-03 | 1.36E-03 | 5.47E-03 | 0 | 2.10E-02 | 1.89E-04 | 1.50E-01 | 4.84E-08 | 4.45E-01 | 1.55E-116 |
| CES1 | 1.60E-03 | 3.14E-04 | 3.44E-03 | 0.01 | 2.17E-02 | 1.34E-02 | 7.38E-02 | 1.93E-05 | 4.33E-01 | 5.44E-113 |
| CFH | 2.93E-03 | 9.88E-04 | 5.55E-03 | 0.002 | 1.11E-02 | 8.26E-05 | 2.63E-01 | 1.11E-04 | 4.46E-01 | 1.79E-94 |
| CGREF1 | 2.52E-03 | 8.95E-04 | 4.49E-03 | 0 | 1.99E-02 | 5.13E-05 | 1.26E-01 | 4.44E-05 | 4.37E-01 | 1.21E-114 |
| CHCHD10 | 2.05E-03 | 4.29E-04 | 4.13E-03 | 0.006 | 1.94E-02 | 1.23E-05 | 1.06E-01 | 9.44E-03 | 4.38E-01 | 1.77E-97 |
| CHGA | 4.01E-03 | 1.44E-03 | 7.29E-03 | 0.002 | 3.20E-02 | 4.59E-04 | 1.25E-01 | 2.01E-10 | 4.39E-01 | 8.05E-99 |
| CKAP4 | 3.31E-03 | 1.55E-03 | 5.80E-03 | 0 | 1.49E-02 | 3.28E-07 | 2.22E-01 | 1.84E-05 | 4.37E-01 | 6.24E-115 |
| CKMT1A_CKMT1B | 1.28E-03 | 2.42E-04 | 2.77E-03 | 0.008 | 2.60E-02 | 1.29E-03 | 4.91E-02 | 9.63E-03 | 4.44E-01 | 4.32E-117 |
| CLMP | 1.07E-03 | 1.34E-04 | 2.33E-03 | 0.012 | 6.68E-03 | 3.78E-03 | 1.60E-01 | 1.46E-02 | 4.39E-01 | 2.64E-116 |
| CNTN1 | 2.92E-03 | 1.20E-03 | 4.87E-03 | 0 | -1.41E-02 | 7.32E-06 | -2.06E-01 | 1.58E-05 | 4.34E-01 | 2.75E-114 |
| COL18A1 | 1.79E-03 | 1.99E-04 | 3.84E-03 | 0.028 | 1.37E-02 | 1.98E-07 | 1.31E-01 | 2.36E-02 | 4.34E-01 | 1.77E-113 |
| COLEC12 | 1.86E-03 | 2.70E-04 | 3.77E-03 | 0.014 | 1.35E-02 | 2.12E-06 | 1.39E-01 | 1.01E-02 | 4.42E-01 | 9.67E-117 |
| CPM | 1.93E-03 | 5.17E-04 | 3.96E-03 | 0.004 | 1.18E-02 | 2.84E-03 | 1.64E-01 | 1.98E-05 | 4.37E-01 | 6.67E-115 |
| CSF1 | 2.82E-03 | 1.15E-03 | 5.05E-03 | 0 | 1.35E-02 | 5.17E-06 | 2.09E-01 | 4.69E-05 | 4.40E-01 | 4.39E-116 |
| CST3 | 2.19E-03 | 5.27E-04 | 4.18E-03 | 0.012 | 1.55E-02 | 4.95E-07 | 1.41E-01 | 4.17E-03 | 4.38E-01 | 2.86E-115 |
| CSTB | 1.99E-03 | 6.16E-04 | 3.68E-03 | 0.002 | 1.98E-02 | 8.31E-05 | 1.01E-01 | 9.88E-04 | 4.34E-01 | 9.67E-113 |
| CTSO | 1.42E-03 | 2.53E-04 | 3.04E-03 | 0.004 | 1.17E-02 | 9.16E-04 | 1.22E-01 | 4.46E-03 | 4.39E-01 | 8.23E-117 |
| CTSZ | 2.39E-03 | 7.36E-04 | 4.43E-03 | 0.004 | 1.59E-02 | 1.03E-05 | 1.50E-01 | 3.71E-04 | 4.39E-01 | 8.33E-116 |
| CXADR | 2.01E-03 | 6.41E-04 | 3.85E-03 | 0.004 | 1.77E-02 | 2.94E-03 | 1.13E-01 | 9.43E-06 | 4.38E-01 | 2.18E-115 |
| CXCL16 | 3.17E-03 | 1.29E-03 | 5.72E-03 | 0 | 1.04E-02 | 1.25E-04 | 3.05E-01 | 4.21E-08 | 4.35E-01 | 1.33E-114 |
| CXCL17 | 4.08E-03 | 1.63E-03 | 6.84E-03 | 0 | 2.10E-02 | 4.73E-05 | 1.95E-01 | 2.65E-11 | 4.36E-01 | 1.16E-115 |
| DDAH1 | 1.78E-03 | 4.27E-04 | 3.72E-03 | 0.004 | 1.70E-02 | 1.08E-03 | 1.05E-01 | 3.54E-04 | 4.34E-01 | 9.05E-113 |
| DPY30 | 1.27E-03 | 1.13E-04 | 2.89E-03 | 0.026 | 2.62E-02 | 2.00E-04 | 4.87E-02 | 2.39E-02 | 4.38E-01 | 1.80E-115 |
| EFNA1 | 2.03E-03 | 1.75E-04 | 4.18E-03 | 0.03 | 1.71E-02 | 1.19E-08 | 1.19E-01 | 1.99E-02 | 4.38E-01 | 3.54E-114 |
| EFNA4 | 2.72E-03 | 1.14E-03 | 4.94E-03 | 0.002 | 1.51E-02 | 1.64E-06 | 1.79E-01 | 2.40E-04 | 4.44E-01 | 3.48E-116 |
| EGFR | 1.47E-03 | 3.43E-04 | 3.01E-03 | 0.002 | -6.17E-03 | 1.18E-03 | -2.39E-01 | 2.60E-03 | 4.35E-01 | 5.04E-115 |
| ENPP7 | 1.64E-03 | 4.10E-04 | 3.42E-03 | 0.004 | 3.34E-02 | 1.02E-03 | 4.91E-02 | 1.54E-03 | 4.45E-01 | 2.64E-114 |
| EPHA1 | 2.24E-03 | 7.60E-04 | 4.18E-03 | 0 | 1.63E-02 | 2.61E-05 | 1.38E-01 | 4.63E-04 | 4.41E-01 | 1.74E-116 |
| EPHA2 | 1.37E-03 | 2.11E-04 | 3.13E-03 | 0.014 | 1.25E-02 | 1.69E-04 | 1.09E-01 | 2.12E-02 | 4.38E-01 | 3.12E-111 |
| EPS8L2 | 2.32E-03 | 7.93E-04 | 4.20E-03 | 0 | 1.33E-02 | 9.95E-05 | 1.73E-01 | 8.63E-05 | 4.38E-01 | 1.55E-115 |
| EZR | 9.81E-04 | 6.70E-05 | 2.42E-03 | 0.034 | 8.34E-03 | 3.79E-03 | 1.18E-01 | 2.47E-02 | 4.36E-01 | 3.23E-115 |
| F7 | 2.89E-03 | 1.21E-03 | 5.11E-03 | 0 | 1.42E-02 | 3.94E-05 | 2.03E-01 | 3.60E-06 | 4.38E-01 | 2.18E-115 |
| F9 | 1.47E-03 | 3.31E-04 | 2.91E-03 | 0.008 | 6.14E-03 | 3.80E-03 | 2.40E-01 | 8.10E-04 | 4.39E-01 | 3.83E-116 |
| FABP1 | 3.94E-03 | 1.94E-03 | 6.67E-03 | 0 | 7.03E-02 | 1.47E-10 | 5.61E-02 | 5.60E-05 | 4.40E-01 | 1.29E-115 |
| FABP4 | 2.60E-03 | 8.77E-04 | 4.47E-03 | 0 | 2.06E-02 | 1.91E-04 | 1.26E-01 | 3.81E-06 | 4.34E-01 | 1.64E-114 |
| FAM3C | 2.91E-03 | 1.12E-03 | 5.13E-03 | 0 | 1.67E-02 | 6.32E-07 | 1.74E-01 | 1.27E-04 | 4.36E-01 | 6.17E-114 |
| FGFR4 | 2.86E-03 | 1.12E-03 | 5.07E-03 | 0 | 8.87E-03 | 2.39E-04 | 3.22E-01 | 3.01E-07 | 4.41E-01 | 4.42E-117 |
| FSTL3 | 3.38E-03 | 1.56E-03 | 5.67E-03 | 0 | 1.52E-02 | 4.41E-06 | 2.22E-01 | 1.49E-06 | 4.41E-01 | 3.49E-116 |
| FUOM | 1.95E-03 | 4.69E-04 | 3.91E-03 | 0 | 2.42E-02 | 6.78E-04 | 8.05E-02 | 1.82E-03 | 4.37E-01 | 6.36E-95 |
| FURIN | 2.82E-03 | 1.11E-03 | 4.88E-03 | 0 | 1.67E-02 | 2.15E-05 | 1.69E-01 | 1.24E-05 | 4.41E-01 | 5.13E-117 |
| GAST | 5.09E-03 | 1.85E-03 | 8.77E-03 | 0 | 4.56E-02 | 9.46E-04 | 1.12E-01 | 1.09E-17 | 4.35E-01 | 1.07E-96 |
| GCG | 1.50E-03 | 1.82E-04 | 3.28E-03 | 0.024 | 3.51E-02 | 1.81E-02 | 4.27E-02 | 4.74E-05 | 4.30E-01 | 9.44E-109 |
| GCHFR | 3.67E-03 | 1.48E-03 | 6.47E-03 | 0 | 2.64E-02 | 2.22E-05 | 1.39E-01 | 4.50E-06 | 4.35E-01 | 2.10E-92 |
| GDF15 | 5.91E-03 | 3.09E-03 | 9.30E-03 | 0 | 2.22E-02 | 1.25E-07 | 2.66E-01 | 1.06E-13 | 4.31E-01 | 5.79E-113 |
| GFRA1 | 3.18E-03 | 1.43E-03 | 5.54E-03 | 0 | 1.42E-02 | 2.61E-06 | 2.24E-01 | 7.72E-06 | 4.36E-01 | 1.07E-114 |
| GLA | 1.25E-03 | 1.31E-04 | 2.83E-03 | 0.02 | 1.12E-02 | 1.08E-02 | 1.11E-01 | 7.92E-03 | 4.36E-01 | 9.47E-95 |
| GLB1 | 1.86E-03 | 4.67E-04 | 3.66E-03 | 0.002 | 1.77E-02 | 3.72E-04 | 1.05E-01 | 6.88E-04 | 4.46E-01 | 4.64E-117 |
| GPR37 | 1.11E-03 | 1.01E-04 | 2.63E-03 | 0.024 | 2.03E-02 | 7.19E-03 | 5.48E-02 | 7.74E-03 | 4.41E-01 | 1.31E-113 |
| GRPEL1 | 3.32E-03 | 1.37E-03 | 5.60E-03 | 0 | 3.77E-02 | 6.05E-08 | 8.80E-02 | 6.16E-05 | 4.32E-01 | 6.81E-112 |
| GUSB | 2.65E-03 | 1.01E-03 | 4.88E-03 | 0 | 2.30E-02 | 6.35E-04 | 1.15E-01 | 3.33E-07 | 4.36E-01 | 1.27E-114 |
| HAVCR1 | 2.14E-03 | 7.26E-04 | 4.16E-03 | 0.002 | 3.00E-02 | 1.12E-05 | 7.12E-02 | 1.33E-03 | 4.37E-01 | 3.48E-115 |
| HAVCR2 | 2.31E-03 | 8.55E-04 | 4.47E-03 | 0.002 | 1.39E-02 | 3.26E-04 | 1.67E-01 | 2.52E-05 | 4.38E-01 | 2.36E-114 |
| HNMT | 2.12E-03 | 5.32E-04 | 4.21E-03 | 0.008 | 2.62E-02 | 1.06E-06 | 8.10E-02 | 4.98E-03 | 4.45E-01 | 1.78E-116 |
| IFI30 | 4.25E-03 | 1.86E-03 | 7.09E-03 | 0 | 2.23E-02 | 5.70E-07 | 1.91E-01 | 4.09E-06 | 4.42E-01 | 2.09E-97 |
| IFNG | 1.32E-03 | 1.50E-04 | 2.80E-03 | 0.012 | 4.61E-02 | 7.08E-04 | 2.86E-02 | 1.25E-02 | 4.33E-01 | 5.71E-110 |
| IGFBP4 | 3.96E-03 | 1.49E-03 | 6.65E-03 | 0 | 3.19E-02 | 6.60E-13 | 1.24E-01 | 3.67E-04 | 4.36E-01 | 4.56E-112 |
| IGSF21 | 2.55E-03 | 9.29E-04 | 4.66E-03 | 0 | -1.86E-02 | 9.77E-05 | -1.37E-01 | 4.36E-04 | 4.38E-01 | 4.39E-94 |
| IGSF8 | 2.29E-03 | 7.42E-04 | 4.18E-03 | 0 | 1.25E-02 | 3.22E-04 | 1.83E-01 | 2.87E-05 | 4.37E-01 | 8.68E-115 |
| IL10RB | 1.28E-03 | 1.46E-04 | 2.82E-03 | 0.02 | 1.13E-02 | 4.00E-04 | 1.13E-01 | 1.73E-02 | 4.41E-01 | 7.50E-117 |
| IL15 | 3.72E-03 | 1.74E-03 | 6.15E-03 | 0 | 1.50E-02 | 9.21E-05 | 2.48E-01 | 4.29E-10 | 4.37E-01 | 1.31E-114 |
| IL18BP | 2.12E-03 | 7.28E-04 | 4.03E-03 | 0.002 | 1.15E-02 | 7.11E-04 | 1.84E-01 | 3.65E-05 | 4.39E-01 | 3.18E-116 |
| IL1RN | 1.58E-03 | 3.03E-04 | 3.28E-03 | 0.024 | 1.53E-02 | 1.41E-02 | 1.03E-01 | 2.55E-05 | 4.42E-01 | 1.14E-116 |
| IL4R | 1.29E-03 | 1.78E-04 | 2.70E-03 | 0.012 | 1.32E-02 | 1.22E-03 | 9.77E-02 | 8.78E-03 | 4.39E-01 | 1.19E-115 |
| INHBC | 2.39E-03 | 9.20E-04 | 4.39E-03 | 0.002 | 1.96E-02 | 8.25E-05 | 1.22E-01 | 7.35E-05 | 4.38E-01 | 2.77E-114 |
| ISM1 | 2.07E-03 | 5.20E-04 | 3.91E-03 | 0.002 | 1.27E-02 | 5.44E-03 | 1.63E-01 | 1.01E-06 | 4.38E-01 | 2.15E-115 |
| ITGA5 | 9.54E-04 | 4.89E-05 | 2.31E-03 | 0.04 | 7.09E-03 | 1.30E-02 | 1.35E-01 | 1.20E-02 | 4.39E-01 | 5.23E-115 |
| ITGAV | 2.65E-03 | 9.65E-04 | 4.91E-03 | 0 | -6.28E-03 | 9.53E-04 | -4.22E-01 | 1.15E-07 | 4.38E-01 | 1.23E-115 |
| KRT18 | 2.67E-03 | 1.10E-03 | 4.52E-03 | 0 | 3.63E-02 | 6.30E-05 | 7.35E-02 | 1.31E-05 | 4.33E-01 | 2.47E-112 |
| LAIR1 | 1.34E-03 | -1.09E-04 | 3.18E-03 | 0.074 | 1.96E-02 | 1.19E-06 | 6.86E-02 | 7.04E-02 | 4.43E-01 | 5.64E-117 |
| LAMP3 | 2.63E-03 | 5.93E-04 | 4.89E-03 | 0.01 | 1.77E-02 | 3.31E-03 | 1.49E-01 | 2.76E-09 | 4.37E-01 | 1.26E-115 |
| LAYN | 1.49E-03 | 3.63E-04 | 3.11E-03 | 0.004 | 1.15E-02 | 1.89E-03 | 1.29E-01 | 1.94E-03 | 4.46E-01 | 2.41E-117 |
| LEP | 1.99E-03 | 5.11E-04 | 3.86E-03 | 0.002 | 2.24E-02 | 4.33E-03 | 8.91E-02 | 4.46E-06 | 4.38E-01 | 5.34E-115 |
| LGALS1 | 1.59E-03 | 4.29E-04 | 3.36E-03 | 0.002 | 1.48E-02 | 1.59E-04 | 1.07E-01 | 5.71E-03 | 4.38E-01 | 4.59E-115 |
| LGALS4 | 3.40E-03 | 1.54E-03 | 5.58E-03 | 0 | 2.44E-02 | 6.57E-05 | 1.39E-01 | 2.38E-08 | 4.41E-01 | 3.51E-116 |
| LGALS9 | 2.22E-03 | 6.81E-04 | 4.13E-03 | 0.002 | 1.77E-02 | 6.49E-07 | 1.25E-01 | 3.56E-03 | 4.41E-01 | 5.07E-116 |
| LILRB4 | 1.66E-03 | 4.32E-04 | 3.45E-03 | 0 | 1.78E-02 | 3.32E-04 | 9.33E-02 | 2.99E-03 | 4.33E-01 | 8.25E-110 |
| LRP11 | 1.79E-03 | 4.90E-04 | 3.52E-03 | 0 | 1.29E-02 | 1.36E-03 | 1.38E-01 | 2.47E-04 | 4.38E-01 | 4.92E-115 |
| LTBR | 1.75E-03 | 4.05E-04 | 3.55E-03 | 0.004 | 1.28E-02 | 3.21E-05 | 1.37E-01 | 6.25E-03 | 4.43E-01 | 9.76E-117 |
| MAMDC2 | 1.57E-03 | 1.89E-04 | 3.24E-03 | 0.018 | 1.24E-02 | 1.33E-03 | 1.27E-01 | 6.51E-03 | 4.38E-01 | 1.53E-97 |
| MFGE8 | 2.01E-03 | 6.60E-04 | 3.74E-03 | 0 | 1.64E-02 | 1.07E-03 | 1.22E-01 | 6.00E-05 | 4.38E-01 | 1.63E-114 |
| MRC1 | 2.72E-03 | 7.50E-04 | 5.25E-03 | 0.004 | 9.79E-03 | 2.53E-03 | 2.78E-01 | 5.66E-07 | 4.39E-01 | 6.94E-98 |
| MSLN | 2.20E-03 | 3.29E-04 | 4.60E-03 | 0.012 | 1.55E-02 | 1.69E-02 | 1.41E-01 | 1.91E-09 | 4.35E-01 | 1.64E-113 |
| MUC13 | 1.55E-03 | 2.35E-04 | 3.21E-03 | 0.018 | 1.35E-02 | 1.95E-02 | 1.15E-01 | 2.31E-05 | 4.42E-01 | 3.51E-113 |
| NBL1 | 1.78E-03 | 5.32E-04 | 3.50E-03 | 0.002 | 1.23E-02 | 2.85E-05 | 1.45E-01 | 5.16E-03 | 4.42E-01 | 1.79E-117 |
| NCAM2 | 1.37E-03 | 3.16E-04 | 2.87E-03 | 0.002 | -9.36E-03 | 3.30E-03 | -1.46E-01 | 2.37E-03 | 4.39E-01 | 8.39E-115 |
| NECTIN2 | 2.62E-03 | 9.28E-04 | 4.53E-03 | 0.002 | 1.17E-02 | 2.99E-04 | 2.24E-01 | 2.08E-06 | 4.37E-01 | 3.18E-114 |
| NOMO1 | 1.19E-03 | -5.79E-05 | 2.71E-03 | 0.074 | 1.12E-02 | 5.59E-05 | 1.06E-01 | 5.39E-02 | 4.39E-01 | 8.45E-115 |
| NPDC1 | 1.42E-03 | 2.10E-04 | 3.31E-03 | 0.008 | 1.26E-02 | 1.76E-04 | 1.12E-01 | 1.32E-02 | 4.38E-01 | 3.83E-115 |
| NTRK3 | 2.56E-03 | 7.82E-04 | 4.38E-03 | 0.002 | -8.46E-03 | 7.72E-04 | -3.03E-01 | 4.35E-07 | 4.35E-01 | 1.56E-114 |
| NUCB2 | 1.04E-03 | 1.07E-04 | 2.36E-03 | 0.018 | 1.20E-02 | 5.90E-03 | 8.66E-02 | 1.25E-02 | 4.39E-01 | 4.26E-116 |
| OBP2B | 8.74E-04 | 1.96E-05 | 2.13E-03 | 0.042 | -1.68E-02 | 2.39E-02 | -5.20E-02 | 1.23E-02 | 4.46E-01 | 9.05E-117 |
| OCLN | 5.73E-03 | 3.04E-03 | 9.13E-03 | 0 | 2.34E-02 | 2.59E-06 | 2.45E-01 | 1.48E-11 | 4.34E-01 | 1.19E-95 |
| PCBD1 | 3.31E-03 | 1.39E-03 | 6.00E-03 | 0 | 2.14E-02 | 5.44E-05 | 1.54E-01 | 9.00E-06 | 4.35E-01 | 5.03E-94 |
| PCSK9 | 3.59E-03 | 1.70E-03 | 6.18E-03 | 0 | 2.51E-02 | 5.41E-08 | 1.43E-01 | 1.15E-05 | 4.33E-01 | 7.01E-114 |
| PGF | 1.63E-03 | 3.07E-04 | 3.34E-03 | 0.002 | 1.11E-02 | 3.61E-05 | 1.48E-01 | 8.73E-03 | 4.39E-01 | 1.19E-116 |
| PIGR | 5.77E-03 | 2.83E-03 | 8.94E-03 | 0 | 1.98E-02 | 1.83E-06 | 2.92E-01 | 5.50E-15 | 4.34E-01 | 3.98E-111 |
| PIK3IP1 | 1.13E-03 | -2.40E-06 | 2.45E-03 | 0.052 | 1.04E-02 | 3.18E-04 | 1.09E-01 | 3.93E-02 | 4.39E-01 | 7.46E-115 |
| PLA2G15 | 3.05E-03 | 1.13E-03 | 5.21E-03 | 0 | 1.32E-02 | 1.06E-05 | 2.31E-01 | 5.01E-06 | 4.41E-01 | 6.71E-117 |
| PLAU | 1.43E-03 | 3.58E-04 | 2.97E-03 | 0.006 | -1.05E-02 | 1.44E-03 | -1.36E-01 | 3.42E-03 | 4.39E-01 | 9.33E-115 |
| PLAUR | 2.05E-03 | 5.24E-04 | 4.17E-03 | 0 | 9.38E-03 | 2.09E-03 | 2.19E-01 | 1.45E-05 | 4.42E-01 | 8.31E-116 |
| PLTP | 2.09E-03 | 6.76E-04 | 3.91E-03 | 0.002 | -1.33E-02 | 1.42E-03 | -1.58E-01 | 1.43E-05 | 4.34E-01 | 3.50E-114 |
| PRAP1 | 3.24E-03 | 1.13E-03 | 5.68E-03 | 0 | 1.58E-02 | 1.03E-03 | 2.05E-01 | 4.03E-08 | 4.40E-01 | 4.33E-99 |
| PROC | 1.74E-03 | 4.83E-04 | 3.49E-03 | 0.002 | 1.11E-02 | 2.08E-04 | 1.58E-01 | 1.96E-03 | 4.39E-01 | 5.92E-116 |
| PRSS2 | 1.70E-03 | 4.92E-04 | 3.50E-03 | 0.002 | 2.14E-02 | 2.97E-04 | 7.95E-02 | 1.98E-03 | 4.39E-01 | 2.24E-116 |
| PRSS8 | 3.68E-03 | 1.29E-03 | 6.22E-03 | 0 | 1.59E-02 | 5.59E-04 | 2.31E-01 | 3.32E-12 | 4.39E-01 | 3.59E-115 |
| PTGDS | 1.54E-03 | 3.28E-04 | 3.11E-03 | 0.004 | 1.02E-02 | 1.87E-03 | 1.51E-01 | 1.28E-03 | 4.41E-01 | 9.43E-116 |
| PTPRN2 | 1.40E-03 | 1.49E-04 | 2.97E-03 | 0.026 | 1.45E-02 | 7.53E-05 | 9.66E-02 | 2.20E-02 | 4.46E-01 | 5.54E-117 |
| RARRES2 | 3.34E-03 | 1.58E-03 | 5.52E-03 | 0 | 2.58E-02 | 3.17E-06 | 1.30E-01 | 2.15E-06 | 4.38E-01 | 9.22E-116 |
| RBFOX3 | 2.49E-03 | 8.79E-04 | 4.59E-03 | 0 | 1.61E-02 | 1.36E-04 | 1.55E-01 | 3.05E-04 | 4.38E-01 | 7.39E-97 |
| RBP5 | 2.27E-03 | 7.93E-04 | 4.30E-03 | 0 | 2.63E-02 | 3.24E-05 | 8.60E-02 | 3.62E-04 | 4.33E-01 | 1.76E-112 |
| REG3A | 2.06E-03 | 6.70E-04 | 3.79E-03 | 0 | 3.03E-02 | 2.02E-05 | 6.80E-02 | 1.36E-03 | 4.35E-01 | 1.11E-114 |
| REG4 | 2.92E-03 | 1.15E-03 | 5.12E-03 | 0 | 2.52E-02 | 4.53E-06 | 1.16E-01 | 2.91E-05 | 4.40E-01 | 6.60E-116 |
| RIDA | 1.61E-03 | 2.32E-04 | 3.74E-03 | 0.014 | 2.05E-02 | 3.35E-04 | 7.85E-02 | 1.47E-02 | 4.37E-01 | 4.97E-95 |
| RNASE4 | 1.79E-03 | 4.02E-04 | 3.69E-03 | 0.004 | 9.52E-03 | 2.27E-03 | 1.88E-01 | 1.69E-03 | 4.38E-01 | 5.34E-94 |
| RNASE6 | 3.51E-03 | 1.56E-03 | 6.10E-03 | 0 | 1.32E-02 | 4.08E-05 | 2.66E-01 | 2.40E-06 | 4.40E-01 | 1.74E-97 |
| RTN4R | 9.16E-04 | -1.18E-06 | 2.24E-03 | 0.052 | 1.12E-02 | 3.87E-03 | 8.16E-02 | 3.62E-02 | 4.39E-01 | 2.26E-116 |
| SCARB2 | 1.80E-03 | 4.48E-04 | 3.55E-03 | 0.012 | 1.47E-02 | 5.90E-06 | 1.23E-01 | 1.17E-02 | 4.41E-01 | 8.24E-112 |
| SCG2 | 2.20E-03 | 6.31E-04 | 4.47E-03 | 0.002 | 1.22E-02 | 7.92E-04 | 1.80E-01 | 1.58E-05 | 4.36E-01 | 1.64E-114 |
| SCLY | 1.29E-03 | 1.14E-04 | 2.93E-03 | 0.034 | 2.05E-02 | 1.98E-04 | 6.30E-02 | 2.20E-02 | 4.37E-01 | 4.37E-115 |
| SELENOP | 2.70E-03 | 9.80E-04 | 4.77E-03 | 0.002 | -8.51E-03 | 1.38E-03 | -3.17E-01 | 2.72E-06 | 4.38E-01 | 8.29E-98 |
| SHISA5 | 2.14E-03 | 5.74E-04 | 4.35E-03 | 0.002 | 9.64E-03 | 3.88E-04 | 2.22E-01 | 7.93E-04 | 4.41E-01 | 2.04E-99 |
| SMOC1 | 2.78E-03 | 1.02E-03 | 4.94E-03 | 0.002 | 1.39E-02 | 2.29E-04 | 2.00E-01 | 5.95E-07 | 4.37E-01 | 1.58E-115 |
| SPINK1 | 4.31E-03 | 2.04E-03 | 7.42E-03 | 0 | 2.34E-02 | 3.01E-07 | 1.85E-01 | 3.69E-08 | 4.36E-01 | 2.42E-113 |
| SPON1 | 1.26E-03 | 1.81E-04 | 2.70E-03 | 0.016 | 1.24E-02 | 5.92E-04 | 1.02E-01 | 1.59E-02 | 4.41E-01 | 9.77E-117 |
| TAFA5 | 1.99E-03 | 6.67E-04 | 3.90E-03 | 0 | 1.44E-02 | 2.49E-04 | 1.38E-01 | 3.85E-04 | 4.33E-01 | 1.20E-112 |
| TFF1 | 2.41E-03 | 9.04E-04 | 4.37E-03 | 0 | 3.24E-02 | 1.38E-04 | 7.43E-02 | 3.81E-05 | 4.38E-01 | 4.71E-114 |
| TGFBR2 | 2.62E-03 | 9.91E-04 | 4.46E-03 | 0 | 1.33E-02 | 8.85E-05 | 1.97E-01 | 1.09E-05 | 4.41E-01 | 3.85E-117 |
| TNFRSF10A | 3.59E-03 | 1.60E-03 | 6.05E-03 | 0 | 1.65E-02 | 7.24E-06 | 2.18E-01 | 2.07E-07 | 4.44E-01 | 3.06E-116 |
| TNFRSF10B | 2.00E-03 | 7.11E-04 | 3.73E-03 | 0 | 1.90E-02 | 5.92E-05 | 1.05E-01 | 1.24E-03 | 4.46E-01 | 5.88E-117 |
| TNFRSF11A | 2.20E-03 | 7.43E-04 | 4.01E-03 | 0 | 1.66E-02 | 7.57E-05 | 1.32E-01 | 2.29E-04 | 4.38E-01 | 2.04E-116 |
| TNFRSF12A | 1.86E-03 | 6.14E-04 | 3.73E-03 | 0 | 1.63E-02 | 4.27E-05 | 1.14E-01 | 2.77E-03 | 4.42E-01 | 1.91E-117 |
| TNFRSF14 | 1.92E-03 | 4.91E-04 | 3.86E-03 | 0.006 | 1.46E-02 | 1.33E-05 | 1.32E-01 | 3.81E-03 | 4.41E-01 | 2.29E-116 |
| TNFRSF1A | 1.83E-03 | 4.96E-04 | 3.85E-03 | 0.004 | 1.27E-02 | 3.74E-05 | 1.43E-01 | 3.78E-03 | 4.39E-01 | 1.66E-114 |
| TNFRSF1B | 1.87E-03 | 5.31E-04 | 3.59E-03 | 0.004 | 1.81E-02 | 8.84E-06 | 1.04E-01 | 5.90E-03 | 4.38E-01 | 1.86E-114 |
| TNFRSF4 | 1.13E-03 | -3.66E-05 | 2.73E-03 | 0.054 | 1.45E-02 | 3.82E-04 | 7.76E-02 | 3.57E-02 | 4.38E-01 | 3.76E-116 |
| TNFRSF9 | 1.35E-03 | 1.97E-04 | 2.81E-03 | 0.014 | 1.63E-02 | 2.87E-04 | 8.30E-02 | 1.60E-02 | 4.46E-01 | 2.82E-117 |
| TNFSF13 | 2.32E-03 | 7.90E-04 | 4.22E-03 | 0 | 1.28E-02 | 2.86E-05 | 1.81E-01 | 2.57E-04 | 4.40E-01 | 2.45E-116 |
| TNFSF13B | 3.09E-03 | 1.25E-03 | 5.31E-03 | 0 | 1.24E-02 | 4.48E-05 | 2.48E-01 | 5.33E-07 | 4.35E-01 | 1.34E-114 |
| TREM2 | 2.62E-03 | 1.01E-03 | 4.96E-03 | 0.002 | 2.41E-02 | 3.87E-05 | 1.09E-01 | 2.96E-05 | 4.42E-01 | 1.80E-116 |
| TSHB | 2.05E-03 | 6.08E-04 | 4.01E-03 | 0.004 | -3.07E-02 | 7.42E-04 | -6.67E-02 | 6.84E-05 | 4.38E-01 | 6.52E-115 |
| ULBP2 | 1.37E-03 | 1.97E-04 | 2.89E-03 | 0.008 | 1.54E-02 | 2.28E-04 | 8.94E-02 | 1.58E-02 | 4.46E-01 | 2.92E-117 |
| VEGFA | 1.07E-03 | 1.16E-04 | 2.47E-03 | 0.026 | 2.20E-02 | 1.15E-03 | 4.85E-02 | 3.01E-02 | 4.39E-01 | 1.61E-116 |
| VSIG2 | 4.00E-03 | 1.58E-03 | 6.85E-03 | 0 | 2.38E-02 | 1.63E-04 | 1.68E-01 | 4.63E-09 | 4.35E-01 | 3.86E-96 |
| VSIG4 | 1.62E-03 | 3.61E-04 | 3.30E-03 | 0.004 | 1.64E-02 | 2.36E-04 | 9.88E-02 | 3.94E-03 | 4.39E-01 | 2.17E-114 |
| WFDC2 | 5.71E-03 | 3.01E-03 | 9.17E-03 | 0 | 1.91E-02 | 2.52E-06 | 2.99E-01 | 4.36E-14 | 4.36E-01 | 2.33E-108 |
| ZBTB17 | 1.36E-03 | 1.83E-04 | 3.15E-03 | 0.018 | 2.02E-02 | 4.12E-05 | 6.70E-02 | 3.37E-02 | 4.40E-01 | 2.11E-113 |

To examine the mediating role of plasma proteins significantly associated with both trauma exposure and affective symptoms, mediation analyses were performed for proteins identified as FDR-significant (p < 0.05) at baseline. Path a (trauma exposure to plasma proteins), path b (plasma proteins to PHQ-4 scores), path c (direct effect of trauma exposure on PHQ-4 scores), and indirect effects are reported with regression coefficients and p-values in the table.

**Table S29: Regression analysis of plasma proteins and resilience interactions on affective disorder**

| Main effect of biomarker on affective disorder | | | | | | Interaction effect of biomarker and resilience | | | | | |
| --- | --- | --- | --- | --- | --- | --- | --- | --- | --- | --- | --- |
| **Biomarker** | **estimate** | **std.error** | **statistic** | **p-value** | **pfdr** | **Interaction term** | **estimate** | **std.error** | **statistic** | **p-value** | **pfdr** |
| ADAMTS8 | -0.69876 | 0.136735 | -5.11028 | 3.25E-07 | 2.13E-06 | ADAMTS8:Resilience | 0.138958 | 0.036781 | 3.778016 | 1.59E-04 | 8.16E-04 |
| ADM | 0.626971 | 0.199202 | 3.147419 | 1.65E-03 | 2.38E-03 | ADM:Resilience | -0.09839 | 0.053307 | -1.84571 | 6.50E-02 | 8.06E-02 |
| AGR3 | 0.297398 | 0.104099 | 2.856864 | 4.28E-03 | 5.41E-03 | AGR3:Resilience | -0.06141 | 0.028107 | -2.185 | 2.89E-02 | 4.08E-02 |
| AGRN | 0.633019 | 0.185204 | 3.417957 | 6.33E-04 | 1.01E-03 | AGRN:Resilience | -0.13524 | 0.049979 | -2.706 | 6.82E-03 | 1.44E-02 |
| AMBP | 1.076709 | 0.297937 | 3.613878 | 3.03E-04 | 6.05E-04 | AMBP:Resilience | -0.22066 | 0.080169 | -2.75242 | 5.92E-03 | 1.38E-02 |
| ASGR1 | 0.999326 | 0.19825 | 5.040748 | 4.69E-07 | 2.81E-06 | ASGR1:Resilience | -0.19085 | 0.053525 | -3.56566 | 3.64E-04 | 1.67E-03 |
| ASGR2 | 0.643792 | 0.292384 | 2.201871 | 2.77E-02 | 3.16E-02 | ASGR2:Resilience | -0.09629 | 0.078989 | -1.21907 | 2.23E-01 | 2.49E-01 |
| BTN2A1 | 0.745674 | 0.247718 | 3.010169 | 2.62E-03 | 3.49E-03 | BTN2A1:Resilience | -0.14785 | 0.067247 | -2.19859 | 2.79E-02 | 4.02E-02 |
| CA14 | -1.05312 | 0.158063 | -6.66268 | 2.78E-11 | 1.00E-09 | CA14:Resilience | 0.213126 | 0.042494 | 5.015443 | 5.35E-07 | 9.63E-06 |
| CA6 | -0.28282 | 0.091863 | -3.07876 | 2.08E-03 | 2.88E-03 | CA6:Resilience | 0.048158 | 0.024688 | 1.950652 | 5.11E-02 | 6.69E-02 |
| CCL11 | 0.282608 | 0.153744 | 1.838178 | 6.61E-02 | 6.99E-02 | CCL11:Resilience | -0.03774 | 0.041427 | -0.91098 | 3.62E-01 | 3.78E-01 |
| CD99L2 | 0.897128 | 0.25625 | 3.500988 | 4.65E-04 | 8.16E-04 | CD99L2:Resilience | -0.18436 | 0.069032 | -2.67072 | 7.58E-03 | 1.45E-02 |
| CDCP1 | 0.156631 | 0.113864 | 1.375593 | 1.69E-01 | 1.74E-01 | CDCP1:Resilience | -0.00508 | 0.030676 | -0.16557 | 8.68E-01 | 8.68E-01 |
| CGREF1 | 0.705764 | 0.145326 | 4.856407 | 1.21E-06 | 5.43E-06 | CGREF1:Resilience | -0.15628 | 0.039193 | -3.98742 | 6.71E-05 | 4.81E-04 |
| CKAP4 | 0.888927 | 0.241861 | 3.675367 | 2.38E-04 | 5.20E-04 | CKAP4:Resilience | -0.17665 | 0.065226 | -2.70821 | 6.77E-03 | 1.44E-02 |
| CNTN1 | -0.80948 | 0.21284 | -3.80326 | 1.43E-04 | 3.82E-04 | CNTN1:Resilience | 0.158326 | 0.057235 | 2.766255 | 5.68E-03 | 1.36E-02 |
| CSF1 | 0.806274 | 0.233587 | 3.451703 | 5.59E-04 | 9.57E-04 | CSF1:Resilience | -0.16243 | 0.062884 | -2.58305 | 9.80E-03 | 1.76E-02 |
| CXCL16 | 0.968484 | 0.258932 | 3.740304 | 1.84E-04 | 4.68E-04 | CXCL16:Resilience | -0.19394 | 0.070001 | -2.77047 | 5.60E-03 | 1.36E-02 |
| CXCL17 | 0.350684 | 0.122304 | 2.86732 | 4.15E-03 | 5.33E-03 | CXCL17:Resilience | -0.03978 | 0.032827 | -1.21171 | 2.26E-01 | 2.49E-01 |
| EPHA1 | 0.599393 | 0.169574 | 3.534689 | 4.09E-04 | 7.56E-04 | EPHA1:Resilience | -0.1267 | 0.045698 | -2.77254 | 5.57E-03 | 1.36E-02 |
| EPS8L2 | 0.782581 | 0.199623 | 3.9203 | 8.88E-05 | 3.00E-04 | EPS8L2:Resilience | -0.17321 | 0.053954 | -3.21033 | 1.33E-03 | 5.03E-03 |
| F7 | 0.773193 | 0.199719 | 3.871411 | 1.09E-04 | 3.15E-04 | F7:Resilience | -0.15295 | 0.053838 | -2.84092 | 4.50E-03 | 1.25E-02 |
| FABP1 | 0.178171 | 0.062813 | 2.836529 | 4.57E-03 | 5.67E-03 | FABP1:Resilience | -0.03195 | 0.016891 | -1.89167 | 5.86E-02 | 7.40E-02 |
| FABP4 | 0.384884 | 0.098368 | 3.912706 | 9.17E-05 | 3.00E-04 | FABP4:Resilience | -0.07206 | 0.026041 | -2.76715 | 5.66E-03 | 1.36E-02 |
| FAM3C | 0.237888 | 0.204873 | 1.161148 | 2.46E-01 | 2.46E-01 | FAM3C:Resilience | -0.01415 | 0.055529 | -0.25488 | 7.99E-01 | 8.10E-01 |
| FGFR4 | 0.983231 | 0.277083 | 3.548502 | 3.89E-04 | 7.36E-04 | FGFR4:Resilience | -0.18721 | 0.074224 | -2.52218 | 1.17E-02 | 2.00E-02 |
| FSTL3 | 0.860433 | 0.196964 | 4.368482 | 1.26E-05 | 4.77E-05 | FSTL3:Resilience | -0.17379 | 0.052969 | -3.28091 | 1.04E-03 | 4.15E-03 |
| FUOM | 0.424773 | 0.113726 | 3.735058 | 1.88E-04 | 4.68E-04 | FUOM:Resilience | -0.09643 | 0.030655 | -3.14555 | 1.66E-03 | 5.98E-03 |
| FURIN | 0.741744 | 0.162557 | 4.562987 | 5.08E-06 | 2.15E-05 | FURIN:Resilience | -0.15555 | 0.043677 | -3.56128 | 3.70E-04 | 1.67E-03 |
| GAST | 0.263264 | 0.059816 | 4.401259 | 1.08E-05 | 4.34E-05 | GAST:Resilience | -0.0439 | 0.016169 | -2.7154 | 6.63E-03 | 1.44E-02 |
| GCHFR | 0.676291 | 0.135071 | 5.006934 | 5.61E-07 | 2.88E-06 | GCHFR:Resilience | -0.1452 | 0.03661 | -3.96609 | 7.35E-05 | 4.81E-04 |
| GDF15 | 0.595614 | 0.144013 | 4.135822 | 3.56E-05 | 1.28E-04 | GDF15:Resilience | -0.0873 | 0.038377 | -2.27482 | 2.29E-02 | 3.44E-02 |
| GFRA1 | 0.73056 | 0.220612 | 3.311518 | 9.30E-04 | 1.46E-03 | GFRA1:Resilience | -0.1434 | 0.059598 | -2.40612 | 1.61E-02 | 2.64E-02 |
| GRPEL1 | 0.319198 | 0.102709 | 3.107789 | 1.89E-03 | 2.67E-03 | GRPEL1:Resilience | -0.06485 | 0.027842 | -2.32915 | 1.99E-02 | 3.11E-02 |
| GUSB | 0.609039 | 0.095577 | 6.372251 | 1.91E-10 | 4.60E-09 | GUSB:Resilience | -0.136 | 0.025649 | -5.30236 | 1.16E-07 | 3.11E-06 |
| IFI30 | 0.941504 | 0.187882 | 5.01115 | 5.48E-07 | 2.88E-06 | IFI30:Resilience | -0.2074 | 0.05048 | -4.10852 | 4.01E-05 | 3.21E-04 |
| IGFBP4 | 0.344635 | 0.151064 | 2.281382 | 2.25E-02 | 2.66E-02 | IGFBP4:Resilience | -0.05056 | 0.040604 | -1.24525 | 2.13E-01 | 2.43E-01 |
| IGSF21 | -0.58389 | 0.181556 | -3.21602 | 1.30E-03 | 1.95E-03 | IGSF21:Resilience | 0.118831 | 0.048888 | 2.4307 | 1.51E-02 | 2.53E-02 |
| IGSF8 | 0.453358 | 0.205594 | 2.205111 | 2.75E-02 | 3.16E-02 | IGSF8:Resilience | -0.07608 | 0.055312 | -1.37555 | 1.69E-01 | 2.03E-01 |
| IL15 | 0.993805 | 0.19138 | 5.192826 | 2.10E-07 | 1.51E-06 | IL15:Resilience | -0.19979 | 0.051318 | -3.89319 | 9.93E-05 | 5.96E-04 |
| ITGAV | -2.07662 | 0.348889 | -5.9521 | 2.70E-09 | 3.89E-08 | ITGAV:Resilience | 0.460533 | 0.093955 | 4.901628 | 9.60E-07 | 1.38E-05 |
| KRT18 | 0.408895 | 0.07217 | 5.665723 | 1.49E-08 | 1.53E-07 | KRT18:Resilience | -0.09264 | 0.019366 | -4.78353 | 1.74E-06 | 1.79E-05 |
| LGALS4 | 0.420245 | 0.114977 | 3.655039 | 2.58E-04 | 5.46E-04 | LGALS4:Resilience | -0.08286 | 0.030994 | -2.67333 | 7.52E-03 | 1.45E-02 |
| LILRB4 | 0.52027 | 0.14106 | 3.688292 | 2.27E-04 | 5.20E-04 | LILRB4:Resilience | -0.11182 | 0.037962 | -2.94558 | 3.23E-03 | 1.06E-02 |
| LRP11 | 0.492689 | 0.175109 | 2.813615 | 4.90E-03 | 5.99E-03 | LRP11:Resilience | -0.10576 | 0.047278 | -2.23694 | 2.53E-02 | 3.72E-02 |
| MFGE8 | 0.493112 | 0.144074 | 3.422621 | 6.22E-04 | 1.01E-03 | MFGE8:Resilience | -0.10444 | 0.038738 | -2.69598 | 7.03E-03 | 1.45E-02 |
| OCLN | 0.808003 | 0.166049 | 4.866052 | 1.15E-06 | 5.43E-06 | OCLN:Resilience | -0.15923 | 0.045021 | -3.53671 | 4.07E-04 | 1.72E-03 |
| PCBD1 | 0.878789 | 0.15318 | 5.736956 | 9.86E-09 | 1.18E-07 | PCBD1:Resilience | -0.19925 | 0.041211 | -4.83494 | 1.35E-06 | 1.62E-05 |
| PCSK9 | 0.546069 | 0.150665 | 3.6244 | 2.91E-04 | 5.98E-04 | PCSK9:Resilience | -0.10828 | 0.040585 | -2.66788 | 7.64E-03 | 1.45E-02 |
| PIGR | 1.175469 | 0.173598 | 6.771231 | 1.32E-11 | 9.53E-10 | PIGR:Resilience | -0.24728 | 0.046814 | -5.28219 | 1.29E-07 | 3.11E-06 |
| PLA2G15 | 1.497383 | 0.236779 | 6.323972 | 2.62E-10 | 4.71E-09 | PLA2G15:Resilience | -0.34446 | 0.063545 | -5.42074 | 6.02E-08 | 3.11E-06 |
| PLAUR | 0.808131 | 0.229804 | 3.516609 | 4.38E-04 | 7.89E-04 | PLAUR:Resilience | -0.1573 | 0.062037 | -2.53561 | 1.12E-02 | 1.97E-02 |
| PRAP1 | 0.838692 | 0.155221 | 5.403196 | 6.66E-08 | 5.99E-07 | PRAP1:Resilience | -0.17656 | 0.041779 | -4.22606 | 2.39E-05 | 2.15E-04 |
| PRSS8 | 0.75399 | 0.141191 | 5.340229 | 9.41E-08 | 7.53E-07 | PRSS8:Resilience | -0.14664 | 0.037913 | -3.86777 | 1.10E-04 | 6.11E-04 |
| RARRES2 | 0.386114 | 0.117979 | 3.272743 | 1.07E-03 | 1.64E-03 | RARRES2:Resilience | -0.0729 | 0.031903 | -2.28505 | 2.23E-02 | 3.42E-02 |
| RBFOX3 | 0.565813 | 0.188451 | 3.002443 | 2.68E-03 | 3.51E-03 | RBFOX3:Resilience | -0.10967 | 0.051028 | -2.14931 | 3.16E-02 | 4.38E-02 |
| RBP5 | 0.383316 | 0.103138 | 3.716546 | 2.03E-04 | 4.86E-04 | RBP5:Resilience | -0.07934 | 0.027822 | -2.85159 | 4.36E-03 | 1.25E-02 |
| REG3A | 0.212553 | 0.098296 | 2.162383 | 3.06E-02 | 3.44E-02 | REG3A:Resilience | -0.03534 | 0.026337 | -1.34178 | 1.80E-01 | 2.12E-01 |
| REG4 | 0.245472 | 0.125676 | 1.95322 | 5.08E-02 | 5.49E-02 | REG4:Resilience | -0.0333 | 0.03401 | -0.9791 | 3.28E-01 | 3.52E-01 |
| RNASE6 | 0.988655 | 0.255479 | 3.869805 | 1.09E-04 | 3.15E-04 | RNASE6:Resilience | -0.19987 | 0.069494 | -2.87603 | 4.03E-03 | 1.24E-02 |
| SPINK1 | 0.50295 | 0.157695 | 3.189387 | 1.43E-03 | 2.10E-03 | SPINK1:Resilience | -0.08192 | 0.042563 | -1.92467 | 5.43E-02 | 6.98E-02 |
| TAFA5 | 0.300296 | 0.176514 | 1.701263 | 8.89E-02 | 9.28E-02 | TAFA5:Resilience | -0.04519 | 0.047866 | -0.94405 | 3.45E-01 | 3.65E-01 |
| TFF1 | 0.325436 | 0.08453 | 3.849929 | 1.19E-04 | 3.29E-04 | TFF1:Resilience | -0.06454 | 0.022503 | -2.86812 | 4.13E-03 | 1.24E-02 |
| TGFBR2 | 0.683308 | 0.198912 | 3.435232 | 5.94E-04 | 9.94E-04 | TGFBR2:Resilience | -0.13946 | 0.053382 | -2.61258 | 8.99E-03 | 1.66E-02 |
| TNFRSF10A | 0.59047 | 0.195911 | 3.013977 | 2.58E-03 | 3.49E-03 | TNFRSF10A:Resilience | -0.10492 | 0.052612 | -1.99424 | 4.61E-02 | 6.15E-02 |
| TNFRSF10B | 0.191032 | 0.146179 | 1.306837 | 1.91E-01 | 1.94E-01 | TNFRSF10B:Resilience | -0.02357 | 0.039828 | -0.59173 | 5.54E-01 | 5.70E-01 |
| TNFRSF11A | 0.315294 | 0.161115 | 1.956944 | 5.04E-02 | 5.49E-02 | TNFRSF11A:Resilience | -0.05241 | 0.043469 | -1.20576 | 2.28E-01 | 2.49E-01 |
| TNFRSF12A | 0.329447 | 0.168865 | 1.950953 | 5.11E-02 | 5.49E-02 | TNFRSF12A:Resilience | -0.0602 | 0.045267 | -1.3299 | 1.84E-01 | 2.13E-01 |
| TNFSF13 | 0.592684 | 0.226072 | 2.621665 | 8.76E-03 | 1.05E-02 | TNFSF13:Resilience | -0.10847 | 0.061026 | -1.7775 | 7.55E-02 | 9.21E-02 |
| TNFSF13B | 0.876001 | 0.22627 | 3.871491 | 1.09E-04 | 3.15E-04 | TNFSF13B:Resilience | -0.18285 | 0.060862 | -3.0043 | 2.67E-03 | 9.14E-03 |
| VSIG2 | 0.468204 | 0.1309 | 3.576793 | 3.49E-04 | 6.79E-04 | VSIG2:Resilience | -0.08419 | 0.035321 | -2.38372 | 1.72E-02 | 2.74E-02 |
| WFDC2 | 0.649112 | 0.17658 | 3.676011 | 2.38E-04 | 5.20E-04 | WFDC2:Resilience | -0.09625 | 0.047369 | -2.03184 | 4.22E-02 | 5.73E-02 |

To evaluate whether resilience moderates the effect of plasma proteins on affective symptoms, linear regression analyses were performed for each plasma protein at baseline. Each model includes a plasma protein, resilience, and covariates as independent variables, with PHQ-4 scores as dependent variables. Beta coefficients and p-values are reported for the main effects of each plasma protein and the interaction effects with resilience in the table.

**Table S30: Gene ontology analysis of plasma proteins mediating trauma exposure to affective disorder**

| **ONTOLOGY** | **ID** | **Description** | **GeneRatio** | **BgRatio** | **pvalue** | **p.adjust** | **qvalue** | **geneID** | **Count** |
| --- | --- | --- | --- | --- | --- | --- | --- | --- | --- |
| BP | GO:0071674 | mononuclear cell migration | 7/70 | 199/18800 | 9.14E-06 | 8.73E-03 | 7.37E-03 | CCL11/CD99L2/CSF1/CXCL16/CXCL17/RARRES2/TNFRSF11A | 7 |
| BP | GO:0009991 | response to extracellular stimulus | 10/70 | 479/18800 | 1.06E-05 | 8.73E-03 | 7.37E-03 | ADM/ASGR1/F7/GAST/GDF15/IL15/LRP11/PCSK9/SPINK1/TGFBR2 | 10 |
| BP | GO:0030595 | leukocyte chemotaxis | 7/70 | 236/18800 | 2.75E-05 | 9.34E-03 | 7.88E-03 | CCL11/CSF1/CXCL16/CXCL17/F7/RARRES2/TNFRSF11A | 7 |
| BP | GO:0006898 | receptor-mediated endocytosis | 7/70 | 246/18800 | 3.58E-05 | 9.34E-03 | 7.88E-03 | ADM/ASGR1/CXCL16/ITGAV/LILRB4/PCSK9/TGFBR2 | 7 |
| BP | GO:0010759 | positive regulation of macrophage chemotaxis | 3/70 | 18/18800 | 3.88E-05 | 9.34E-03 | 7.88E-03 | CSF1/CXCL17/RARRES2 | 3 |
| BP | GO:0045785 | positive regulation of cell adhesion | 9/70 | 446/18800 | 3.96E-05 | 9.34E-03 | 7.88E-03 | CSF1/EPHA1/FSTL3/IL15/ITGAV/LILRB4/PLAUR/TGFBR2/TNFSF13B | 9 |
| BP | GO:0032368 | regulation of lipid transport | 5/70 | 118/18800 | 7.82E-05 | 1.51E-02 | 1.28E-02 | FURIN/ITGAV/PCSK9/PRAP1/TNFRSF11A | 5 |
| BP | GO:0006869 | lipid transport | 8/70 | 391/18800 | 9.98E-05 | 1.51E-02 | 1.28E-02 | FABP1/FABP4/FURIN/ITGAV/PCSK9/PRAP1/RBP5/TNFRSF11A | 8 |
| BP | GO:1905523 | positive regulation of macrophage migration | 3/70 | 25/18800 | 1.07E-04 | 1.51E-02 | 1.28E-02 | CSF1/CXCL17/RARRES2 | 3 |
| BP | GO:0043434 | response to peptide hormone | 8/70 | 404/18800 | 1.25E-04 | 1.51E-02 | 1.28E-02 | ADM/F7/GDF15/PCSK9/RARRES2/REG3A/SPINK1/TFF1 | 8 |
| BP | GO:0002573 | myeloid leukocyte differentiation | 6/70 | 210/18800 | 1.31E-04 | 1.51E-02 | 1.28E-02 | CSF1/FSTL3/IL15/LILRB4/TGFBR2/TNFRSF11A | 6 |
| BP | GO:0061041 | regulation of wound healing | 5/70 | 133/18800 | 1.38E-04 | 1.51E-02 | 1.28E-02 | F7/OCLN/REG3A/TAFA5/TNFRSF12A | 5 |
| BP | GO:0010876 | lipid localization | 8/70 | 446/18800 | 2.45E-04 | 2.13E-02 | 1.80E-02 | FABP1/FABP4/FURIN/ITGAV/PCSK9/PRAP1/RBP5/TNFRSF11A | 8 |
| BP | GO:1905952 | regulation of lipid localization | 5/70 | 155/18800 | 2.81E-04 | 2.20E-02 | 1.86E-02 | FURIN/ITGAV/PCSK9/PRAP1/TNFRSF11A | 5 |
| BP | GO:0034612 | response to tumor necrosis factor | 6/70 | 249/18800 | 3.28E-04 | 2.45E-02 | 2.07E-02 | CCL11/CXCL16/FABP4/KRT18/TNFRSF11A/TNFSF13B | 6 |
| BP | GO:0010951 | negative regulation of endopeptidase activity | 6/70 | 251/18800 | 3.42E-04 | 2.45E-02 | 2.07E-02 | AMBP/FABP1/FURIN/PLAUR/SPINK1/WFDC2 | 6 |
| BP | GO:0010466 | negative regulation of peptidase activity | 6/70 | 262/18800 | 4.30E-04 | 2.45E-02 | 2.07E-02 | AMBP/FABP1/FURIN/PLAUR/SPINK1/WFDC2 | 6 |
| BP | GO:0051346 | negative regulation of hydrolase activity | 7/70 | 371/18800 | 4.54E-04 | 2.45E-02 | 2.07E-02 | AMBP/FABP1/FURIN/GCHFR/PLAUR/SPINK1/WFDC2 | 7 |
| BP | GO:0018108 | peptidyl-tyrosine phosphorylation | 7/70 | 373/18800 | 4.69E-04 | 2.45E-02 | 2.07E-02 | CNTN1/EPHA1/FGFR4/GFRA1/IL15/LILRB4/SPINK1 | 7 |
| BP | GO:0060443 | mammary gland morphogenesis | 3/70 | 44/18800 | 5.87E-04 | 2.73E-02 | 2.30E-02 | CCL11/CSF1/TGFBR2 | 3 |
| BP | GO:0035860 | glial cell-derived neurotrophic factor receptor signaling pathway | 2/70 | 10/18800 | 6.03E-04 | 2.73E-02 | 2.30E-02 | GDF15/GFRA1 | 2 |
| BP | GO:0022600 | digestive system process | 4/70 | 104/18800 | 6.12E-04 | 2.73E-02 | 2.30E-02 | FABP1/PRAP1/SPINK1/TFF1 | 4 |
| BP | GO:0036363 | transforming growth factor beta activation | 2/70 | 11/18800 | 7.36E-04 | 3.08E-02 | 2.60E-02 | FURIN/ITGAV | 2 |
| BP | GO:2000644 | regulation of receptor catabolic process | 2/70 | 11/18800 | 7.36E-04 | 3.08E-02 | 2.60E-02 | FURIN/PCSK9 | 2 |
| BP | GO:0002645 | positive regulation of tolerance induction | 2/70 | 12/18800 | 8.80E-04 | 3.54E-02 | 2.98E-02 | LILRB4/TGFBR2 | 2 |
| BP | GO:0002664 | regulation of T cell tolerance induction | 2/70 | 13/18800 | 1.04E-03 | 3.80E-02 | 3.21E-02 | LILRB4/TGFBR2 | 2 |
| BP | GO:0036462 | TRAIL-activated apoptotic signaling pathway | 2/70 | 13/18800 | 1.04E-03 | 3.80E-02 | 3.21E-02 | TNFRSF10A/TNFRSF10B | 2 |
| BP | GO:0042060 | wound healing | 7/70 | 429/18800 | 1.07E-03 | 3.82E-02 | 3.23E-02 | F7/OCLN/PLAUR/REG3A/TAFA5/TGFBR2/TNFRSF12A | 7 |
| BP | GO:0019730 | antimicrobial humoral response | 4/70 | 122/18800 | 1.11E-03 | 3.88E-02 | 3.27E-02 | RARRES2/REG3A/RNASE6/WFDC2 | 4 |
| BP | GO:0042117 | monocyte activation | 2/70 | 14/18800 | 1.21E-03 | 3.98E-02 | 3.36E-02 | CSF1/LILRB4 | 2 |
| BP | GO:0032103 | positive regulation of response to external stimulus | 7/70 | 442/18800 | 1.27E-03 | 4.04E-02 | 3.41E-02 | CSF1/CXCL17/F7/FABP4/IL15/RARRES2/TNFRSF11A | 7 |
| BP | GO:0060456 | positive regulation of digestive system process | 2/70 | 15/18800 | 1.39E-03 | 4.04E-02 | 3.41E-02 | PRAP1/SPINK1 | 2 |
| BP | GO:0071356 | cellular response to tumor necrosis factor | 5/70 | 229/18800 | 1.63E-03 | 4.56E-02 | 3.85E-02 | CCL11/FABP4/KRT18/TNFRSF11A/TNFSF13B | 5 |
| BP | GO:0007586 | digestion | 4/70 | 137/18800 | 1.71E-03 | 4.69E-02 | 3.95E-02 | FABP1/PRAP1/SPINK1/TFF1 | 4 |
| BP | GO:0045670 | regulation of osteoclast differentiation | 3/70 | 64/18800 | 1.75E-03 | 4.69E-02 | 3.95E-02 | CSF1/FSTL3/LILRB4 | 3 |
| BP | GO:0032944 | regulation of mononuclear cell proliferation | 5/70 | 233/18800 | 1.76E-03 | 4.69E-02 | 3.95E-02 | CSF1/IL15/LILRB4/TGFBR2/TNFSF13B | 5 |
| BP | GO:0031100 | animal organ regeneration | 3/70 | 65/18800 | 1.83E-03 | 4.76E-02 | 4.01E-02 | ADM/F7/TGFBR2 | 3 |
| BP | GO:0050921 | positive regulation of chemotaxis | 4/70 | 140/18800 | 1.85E-03 | 4.76E-02 | 4.01E-02 | CSF1/CXCL17/F7/RARRES2 | 4 |
| BP | GO:0033674 | positive regulation of kinase activity | 7/70 | 476/18800 | 1.93E-03 | 4.81E-02 | 4.06E-02 | CSF1/EPHA1/FGFR4/TGFBR2/TNFRSF10A/TNFRSF10B/TNFRSF11A | 7 |
| BP | GO:0007250 | activation of NF-kappaB-inducing kinase activity | 2/70 | 18/18800 | 2.01E-03 | 4.81E-02 | 4.06E-02 | TNFRSF10A/TNFRSF10B | 2 |
| BP | GO:0048535 | lymph node development | 2/70 | 18/18800 | 2.01E-03 | 4.81E-02 | 4.06E-02 | IL15/TNFRSF11A | 2 |
| CC | GO:0009897 | external side of plasma membrane | 10/72 | 455/19594 | 6.11E-06 | 8.19E-04 | 6.82E-04 | ASGR1/ASGR2/BTN2A1/GFRA1/IGSF21/ITGAV/MFGE8/PCSK9/TGFBR2/TNFRSF11A | 10 |
| CC | GO:0005788 | endoplasmic reticulum lumen | 8/72 | 311/19594 | 1.82E-05 | 1.22E-03 | 1.02E-03 | CKAP4/CSF1/F7/FSTL3/IGFBP4/MFGE8/PCSK9/PLAUR | 8 |
| CC | GO:0062023 | collagen-containing extracellular matrix | 8/72 | 429/19594 | 1.74E-04 | 7.77E-03 | 6.47E-03 | ADAMTS8/AGRN/AMBP/F7/GDF15/LGALS4/MFGE8/RARRES2 | 8 |
| CC | GO:1905286 | serine-type peptidase complex | 2/72 | 11/19594 | 7.17E-04 | 2.40E-02 | 2.00E-02 | F7/PLAUR | 2 |
| CC | GO:0031089 | platelet dense granule lumen | 2/72 | 14/19594 | 1.18E-03 | 3.16E-02 | 2.63E-02 | FAM3C/RARRES2 | 2 |
| MF | GO:0005125 | cytokine activity | 9/70 | 235/18410 | 2.55E-07 | 2.11E-05 | 1.38E-05 | CCL11/CSF1/CXCL16/FAM3C/GDF15/IL15/TAFA5/TNFSF13/TNFSF13B | 9 |
| MF | GO:0048018 | receptor ligand activity | 12/70 | 489/18410 | 2.83E-07 | 2.11E-05 | 1.38E-05 | ADM/CCL11/CSF1/CXCL16/FAM3C/GAST/GDF15/IL15/TAFA5/TFF1/TNFSF13/TNFSF13B | 12 |
| MF | GO:0030546 | signaling receptor activator activity | 12/70 | 496/18410 | 3.30E-07 | 2.11E-05 | 1.38E-05 | ADM/CCL11/CSF1/CXCL16/FAM3C/GAST/GDF15/IL15/TAFA5/TFF1/TNFSF13/TNFSF13B | 12 |
| MF | GO:0001968 | fibronectin binding | 4/70 | 31/18410 | 5.58E-06 | 2.68E-04 | 1.75E-04 | EPHA1/FSTL3/ITGAV/LILRB4 | 4 |
| MF | GO:0030246 | carbohydrate binding | 8/70 | 270/18410 | 8.30E-06 | 3.19E-04 | 2.08E-04 | ASGR1/ASGR2/CNTN1/FUOM/GUSB/LGALS4/REG3A/REG4 | 8 |
| MF | GO:0005035 | death receptor activity | 3/70 | 13/18410 | 1.47E-05 | 4.69E-04 | 3.06E-04 | TNFRSF10A/TNFRSF10B/TNFRSF11A | 3 |
| MF | GO:0005126 | cytokine receptor binding | 7/70 | 272/18410 | 7.71E-05 | 2.11E-03 | 1.38E-03 | CCL11/CSF1/CXCL16/IL15/TGFBR2/TNFSF13/TNFSF13B | 7 |
| MF | GO:0019838 | growth factor binding | 5/70 | 139/18410 | 1.86E-04 | 4.47E-03 | 2.92E-03 | FGFR4/FURIN/IGFBP4/ITGAV/TGFBR2 | 5 |
| MF | GO:0005539 | glycosaminoglycan binding | 6/70 | 234/18410 | 2.63E-04 | 5.61E-03 | 3.66E-03 | ADAMTS8/AGRN/FGFR4/REG3A/REG4/TGFBR2 | 6 |
| MF | GO:0004867 | serine-type endopeptidase inhibitor activity | 4/70 | 98/18410 | 5.29E-04 | 1.02E-02 | 6.63E-03 | AMBP/FURIN/SPINK1/WFDC2 | 4 |
| MF | GO:0002162 | dystroglycan binding | 2/70 | 11/18410 | 7.67E-04 | 1.34E-02 | 8.73E-03 | AGR3/AGRN | 2 |
| MF | GO:0005504 | fatty acid binding | 3/70 | 49/18410 | 8.56E-04 | 1.37E-02 | 8.93E-03 | FABP1/FABP4/RBP5 | 3 |
| MF | GO:0004089 | carbonate dehydratase activity | 2/70 | 14/18410 | 1.26E-03 | 1.73E-02 | 1.13E-02 | CA14/CA6 | 2 |
| MF | GO:0048185 | activin binding | 2/70 | 15/18410 | 1.45E-03 | 1.86E-02 | 1.21E-02 | FSTL3/TGFBR2 | 2 |
| MF | GO:0005324 | long-chain fatty acid transporter activity | 2/70 | 17/18410 | 1.87E-03 | 2.11E-02 | 1.38E-02 | FABP1/FABP4 | 2 |
| MF | GO:0034185 | apolipoprotein binding | 2/70 | 18/18410 | 2.10E-03 | 2.24E-02 | 1.46E-02 | LILRB4/PCSK9 | 2 |
| MF | GO:0005178 | integrin binding | 4/70 | 156/18410 | 2.95E-03 | 2.75E-02 | 1.80E-02 | ADAMTS8/GFRA1/ITGAV/MFGE8 | 4 |
| MF | GO:0019199 | transmembrane receptor protein kinase activity | 3/70 | 79/18410 | 3.39E-03 | 2.75E-02 | 1.80E-02 | EPHA1/FGFR4/TGFBR2 | 3 |
| MF | GO:0038024 | cargo receptor activity | 3/70 | 79/18410 | 3.39E-03 | 2.75E-02 | 1.80E-02 | ASGR1/ASGR2/CXCL16 | 3 |
| MF | GO:0004252 | serine-type endopeptidase activity | 4/70 | 174/18410 | 4.35E-03 | 2.98E-02 | 1.95E-02 | F7/FURIN/PCSK9/PRSS8 | 4 |
| MF | GO:0061135 | endopeptidase regulator activity | 4/70 | 194/18410 | 6.38E-03 | 3.50E-02 | 2.28E-02 | AMBP/FURIN/SPINK1/WFDC2 | 4 |
| MF | GO:0017171 | serine hydrolase activity | 4/70 | 195/18410 | 6.49E-03 | 3.50E-02 | 2.28E-02 | F7/FURIN/PCSK9/PRSS8 | 4 |
| MF | GO:0008200 | ion channel inhibitor activity | 2/70 | 32/18410 | 6.57E-03 | 3.50E-02 | 2.28E-02 | AMBP/PCSK9 | 2 |

To elucidate the biological functions of plasma proteins mediating the pathway from trauma exposure to affective symptoms, gene ontology (GO) analysis was performed on proteins identified as significant mediators in trauma-affective disorder pathway (baseline). Significant GO terms (biological process, molecular function, and cellular component) with FDR-corrected p-values are reported, along with enrichment statistics, in the table.

**Table S31: Reactome pathway analysis of plasma proteins mediating trauma exposure to affective disorder**

| **ID** | **Description** | **GeneRatio** | **BgRatio** | **pvalue** | **p.adjust** | **qvalue** | **geneID** | **Count** |
| --- | --- | --- | --- | --- | --- | --- | --- | --- |
| R-HSA-8957275 | Post-translational protein phosphorylation | 6/55 | 108/10891 | 1.62E-05 | 0.003539 | 0.003078 | 10970/1435/10272/3487/4240/255738 | 6 |
| R-HSA-381426 | Regulation of Insulin-like Growth Factor (IGF) transport and uptake by Insulin-like Growth Factor Binding Proteins (IGFBPs) | 6/55 | 125/10891 | 3.71E-05 | 0.004061 | 0.003533 | 10970/1435/10272/3487/4240/255738 | 6 |
| R-HSA-5676594 | TNF receptor superfamily (TNFSF) members mediating non-canonical NF-kB pathway | 3/55 | 18/10891 | 9.43E-05 | 0.00688 | 0.005986 | 8792/51330/10673 | 3 |
| R-HSA-159782 | Removal of aminoterminal propeptides from gamma-carboxylated proteins | 2/55 | 10/10891 | 1.10E-03 | 0.031295 | 0.027226 | 2155/5045 | 2 |
| R-HSA-159854 | Gamma-carboxylation, transport, and amino-terminal cleavage of proteins | 2/55 | 11/10891 | 1.34E-03 | 0.031295 | 0.027226 | 2155/5045 | 2 |
| R-HSA-3371378 | Regulation by c-FLIP | 2/55 | 11/10891 | 1.34E-03 | 0.031295 | 0.027226 | 8797/8795 | 2 |
| R-HSA-5218900 | CASP8 activity is inhibited | 2/55 | 11/10891 | 1.34E-03 | 0.031295 | 0.027226 | 8797/8795 | 2 |
| R-HSA-69416 | Dimerization of procaspase-8 | 2/55 | 11/10891 | 1.34E-03 | 0.031295 | 0.027226 | 8797/8795 | 2 |
| R-HSA-2173789 | TGF-beta receptor signaling activates SMADs | 3/55 | 46/10891 | 1.59E-03 | 0.031295 | 0.027226 | 5045/3685/7048 | 3 |
| R-HSA-1475029 | Reversible hydration of carbon dioxide | 2/55 | 12/10891 | 1.60E-03 | 0.031295 | 0.027226 | 23632/765 | 2 |
| R-HSA-6803211 | TP53 Regulates Transcription of Death Receptors and Ligands | 2/55 | 12/10891 | 1.60E-03 | 0.031295 | 0.027226 | 8797/8795 | 2 |
| R-HSA-5668541 | TNFR2 non-canonical NF-kB pathway | 4/55 | 102/10891 | 1.71E-03 | 0.031295 | 0.027226 | 8792/51330/8741/10673 | 4 |
| R-HSA-140534 | Caspase activation via Death Receptors in the presence of ligand | 2/55 | 17/10891 | 3.24E-03 | 0.05147 | 0.044778 | 8797/8795 | 2 |
| R-HSA-9006936 | Signaling by TGFB family members | 4/55 | 122/10891 | 3.29E-03 | 0.05147 | 0.044778 | 10272/5045/3685/7048 | 4 |
| R-HSA-9694614 | Attachment and Entry | 2/55 | 19/10891 | 4.05E-03 | 0.059167 | 0.051474 | 375790/5045 | 2 |
| R-HSA-202733 | Cell surface interactions at the vascular wall | 4/55 | 137/10891 | 4.98E-03 | 0.068109 | 0.059254 | 83692/3685/8797/8795 | 4 |
| R-HSA-2024096 | HS-GAG degradation | 2/55 | 22/10891 | 5.42E-03 | 0.069844 | 0.060763 | 375790/2990 | 2 |
| R-HSA-163560 | Triglyceride catabolism | 2/55 | 24/10891 | 6.44E-03 | 0.078307 | 0.068126 | 2168/2167 | 2 |
| R-HSA-5357769 | Caspase activation via extrinsic apoptotic signalling pathway | 2/55 | 27/10891 | 8.11E-03 | 0.09274 | 0.080682 | 8797/8795 | 2 |
| R-HSA-5213460 | RIPK1-mediated regulated necrosis | 2/55 | 29/10891 | 9.32E-03 | 0.09274 | 0.080682 | 8797/8795 | 2 |
| R-HSA-5669034 | TNFs bind their physiological receptors | 2/55 | 29/10891 | 9.32E-03 | 0.09274 | 0.080682 | 8741/10673 | 2 |
| R-HSA-5675482 | Regulation of necroptotic cell death | 2/55 | 29/10891 | 9.32E-03 | 0.09274 | 0.080682 | 8797/8795 | 2 |
| R-HSA-170834 | Signaling by TGF-beta Receptor Complex | 3/55 | 93/10891 | 1.15E-02 | 0.10931 | 0.095098 | 5045/3685/7048 | 3 |
| R-HSA-8979227 | Triglyceride metabolism | 2/55 | 37/10891 | 1.49E-02 | 0.13591 | 0.11824 | 2168/2167 | 2 |
| R-HSA-9772572 | Early SARS-CoV-2 Infection Events | 2/55 | 38/10891 | 1.57E-02 | 0.137281 | 0.119432 | 375790/5045 | 2 |
| R-HSA-163841 | Gamma carboxylation, hypusine formation and arylsulfatase activation | 2/55 | 42/10891 | 1.89E-02 | 0.153696 | 0.133713 | 2155/5045 | 2 |
| R-HSA-419037 | NCAM1 interactions | 2/55 | 42/10891 | 1.89E-02 | 0.153696 | 0.133713 | 375790/2674 | 2 |
| R-HSA-1566948 | Elastic fibre formation | 2/55 | 44/10891 | 2.07E-02 | 0.156218 | 0.135907 | 5045/3685 | 2 |
| R-HSA-5633008 | TP53 Regulates Transcription of Cell Death Genes | 2/55 | 44/10891 | 2.07E-02 | 0.156218 | 0.135907 | 8797/8795 | 2 |
| R-HSA-6809371 | Formation of the cornified envelope | 3/55 | 130/10891 | 2.78E-02 | 0.202845 | 0.176472 | 5045/3875/5652 | 3 |
| R-HSA-1638091 | Heparan sulfate/heparin (HS-GAG) metabolism | 2/55 | 55/10891 | 3.14E-02 | 0.221478 | 0.192682 | 375790/2990 | 2 |
| R-HSA-5218859 | Regulated Necrosis | 2/55 | 57/10891 | 3.35E-02 | 0.229128 | 0.199338 | 8797/8795 | 2 |
| R-HSA-3000171 | Non-integrin membrane-ECM interactions | 2/55 | 59/10891 | 3.57E-02 | 0.22972 | 0.199852 | 375790/3685 | 2 |
| R-HSA-380108 | Chemokine receptors bind chemokines | 2/55 | 59/10891 | 3.57E-02 | 0.22972 | 0.199852 | 6356/58191 | 2 |
| R-HSA-375165 | NCAM signaling for neurite out-growth | 2/55 | 63/10891 | 4.02E-02 | 0.251496 | 0.218797 | 375790/2674 | 2 |
| R-HSA-1483115 | Hydrolysis of LPC | 1/55 | 10/10891 | 4.94E-02 | 0.254356 | 0.221285 | 23659 | 1 |
| R-HSA-159740 | Gamma-carboxylation of protein precursors | 1/55 | 10/10891 | 4.94E-02 | 0.254356 | 0.221285 | 2155 | 1 |
| R-HSA-419812 | Calcitonin-like ligand receptors | 1/55 | 10/10891 | 4.94E-02 | 0.254356 | 0.221285 | 133 | 1 |
| R-HSA-174824 | Plasma lipoprotein assembly, remodeling, and clearance | 2/55 | 74/10891 | 5.37E-02 | 0.254356 | 0.221285 | 5045/255738 | 2 |
| R-HSA-2206281 | Mucopolysaccharidoses | 1/55 | 11/10891 | 5.42E-02 | 0.254356 | 0.221285 | 2990 | 1 |
| R-HSA-351906 | Apoptotic cleavage of cell adhesion  proteins | 1/55 | 11/10891 | 5.42E-02 | 0.254356 | 0.221285 | 1.01E+08 | 1 |
| R-HSA-5655291 | Signaling by FGFR4 in disease | 1/55 | 11/10891 | 5.42E-02 | 0.254356 | 0.221285 | 2264 | 1 |
| R-HSA-8963691 | Phenylalanine and tyrosine metabolism | 1/55 | 11/10891 | 5.42E-02 | 0.254356 | 0.221285 | 5092 | 1 |
| R-HSA-3000178 | ECM proteoglycans | 2/55 | 76/10891 | 5.63E-02 | 0.254356 | 0.221285 | 375790/3685 | 2 |
| R-HSA-1474151 | Tetrahydrobiopterin (BH4) synthesis, recycling, salvage and regulation | 1/55 | 12/10891 | 5.90E-02 | 0.254356 | 0.221285 | 2644 | 1 |
| R-HSA-210990 | PECAM1 interactions | 1/55 | 12/10891 | 5.90E-02 | 0.254356 | 0.221285 | 3685 | 1 |
| R-HSA-2160916 | Hyaluronan uptake and degradation | 1/55 | 12/10891 | 5.90E-02 | 0.254356 | 0.221285 | 2990 | 1 |
| R-HSA-8851680 | Butyrophilin (BTN) family interactions | 1/55 | 12/10891 | 5.90E-02 | 0.254356 | 0.221285 | 11120 | 1 |
| R-HSA-109581 | Apoptosis | 3/55 | 180/10891 | 6.24E-02 | 0.254356 | 0.221285 | 100506658/8797/8795 | 3 |
| R-HSA-2168880 | Scavenging of heme from plasma | 1/55 | 13/10891 | 6.37E-02 | 0.254356 | 0.221285 | 259 | 1 |
| R-HSA-2892247 | POU5F1 (OCT4), SOX2, NANOG activate genes related to proliferation | 1/55 | 13/10891 | 6.37E-02 | 0.254356 | 0.221285 | 2041 | 1 |
| R-HSA-5210891 | Uptake and function of anthrax toxins | 1/55 | 13/10891 | 6.37E-02 | 0.254356 | 0.221285 | 5045 | 1 |
| R-HSA-75205 | Dissolution of Fibrin Clot | 1/55 | 13/10891 | 6.37E-02 | 0.254356 | 0.221285 | 5329 | 1 |
| R-HSA-1474244 | Extracellular matrix organization | 4/55 | 300/10891 | 6.44E-02 | 0.254356 | 0.221285 | 11095/375790/5045/3685 | 4 |
| R-HSA-190322 | FGFR4 ligand binding and activation | 1/55 | 14/10891 | 6.85E-02 | 0.254356 | 0.221285 | 2264 | 1 |
| R-HSA-3656237 | Defective EXT2 causes exostoses 2 | 1/55 | 14/10891 | 6.85E-02 | 0.254356 | 0.221285 | 375790 | 1 |
| R-HSA-3656253 | Defective EXT1 causes exostoses 1, TRPS2 and CHDS | 1/55 | 14/10891 | 6.85E-02 | 0.254356 | 0.221285 | 375790 | 1 |
| R-HSA-8983432 | Interleukin-15 signaling | 1/55 | 14/10891 | 6.85E-02 | 0.254356 | 0.221285 | 3600 | 1 |
| R-HSA-216083 | Integrin cell surface interactions | 2/55 | 85/10891 | 6.85E-02 | 0.254356 | 0.221285 | 375790/3685 | 2 |
| R-HSA-1502540 | Signaling by Activin | 1/55 | 15/10891 | 7.32E-02 | 0.258476 | 0.22487 | 10272 | 1 |
| R-HSA-189483 | Heme degradation | 1/55 | 15/10891 | 7.32E-02 | 0.258476 | 0.22487 | 2168 | 1 |
| R-HSA-5654228 | Phospholipase C-mediated cascade; FGFR4 | 1/55 | 15/10891 | 7.32E-02 | 0.258476 | 0.22487 | 2264 | 1 |
| R-HSA-175474 | Assembly Of The HIV Virion | 1/55 | 16/10891 | 7.79E-02 | 0.262338 | 0.22823 | 5045 | 1 |
| R-HSA-2173791 | TGF-beta receptor signaling in EMT (epithelial to mesenchymal transition) | 1/55 | 16/10891 | 7.79E-02 | 0.262338 | 0.22823 | 7048 | 1 |
| R-HSA-8866427 | VLDLR internalisation and degradation | 1/55 | 16/10891 | 7.79E-02 | 0.262338 | 0.22823 | 255738 | 1 |
| R-HSA-2142845 | Hyaluronan metabolism | 1/55 | 17/10891 | 8.25E-02 | 0.263838 | 0.229534 | 2990 | 1 |
| R-HSA-6803157 | Antimicrobial peptides | 2/55 | 95/10891 | 8.30E-02 | 0.263838 | 0.229534 | 5068/6039 | 2 |
| R-HSA-1912420 | Pre-NOTCH Processing in Golgi | 1/55 | 18/10891 | 8.72E-02 | 0.263838 | 0.229534 | 5045 | 1 |
| R-HSA-881907 | Gastrin-CREB signalling pathway via PKC and MAPK | 1/55 | 18/10891 | 8.72E-02 | 0.263838 | 0.229534 | 2520 | 1 |
| R-HSA-5357801 | Programmed Cell Death | 3/55 | 210/10891 | 8.95E-02 | 0.263838 | 0.229534 | 100506658/8797/8795 | 3 |
| R-HSA-8963889 | Assembly of active LPL and LIPC lipase complexes | 1/55 | 19/10891 | 9.18E-02 | 0.263838 | 0.229534 | 5045 | 1 |
| R-HSA-8964038 | LDL clearance | 1/55 | 19/10891 | 9.18E-02 | 0.263838 | 0.229534 | 255738 | 1 |
| R-HSA-6805567 | Keratinization | 3/55 | 214/10891 | 9.34E-02 | 0.263838 | 0.229534 | 5045/3875/5652 | 3 |
| R-HSA-6798695 | Neutrophil degranulation | 5/55 | 482/10891 | 9.51E-02 | 0.263838 | 0.229534 | 10970/2990/3685/5284/5329 | 5 |
| R-HSA-3560783 | Defective B4GALT7 causes EDS, progeroid type | 1/55 | 20/10891 | 9.64E-02 | 0.263838 | 0.229534 | 375790 | 1 |
| R-HSA-3560801 | Defective B3GAT3 causes JDSSDHD | 1/55 | 20/10891 | 9.64E-02 | 0.263838 | 0.229534 | 375790 | 1 |
| R-HSA-4420332 | Defective B3GALT6 causes EDSP2 and SEMDJL1 | 1/55 | 20/10891 | 9.64E-02 | 0.263838 | 0.229534 | 375790 | 1 |
| R-HSA-5654719 | SHC-mediated cascade:FGFR4 | 1/55 | 20/10891 | 9.64E-02 | 0.263838 | 0.229534 | 2264 | 1 |
| R-HSA-5654720 | PI-3K cascade:FGFR4 | 1/55 | 20/10891 | 9.64E-02 | 0.263838 | 0.229534 | 2264 | 1 |
| R-HSA-8978934 | Metabolism of cofactors | 1/55 | 20/10891 | 9.64E-02 | 0.263838 | 0.229534 | 2644 | 1 |
| R-HSA-445144 | Signal transduction by L1 | 1/55 | 21/10891 | 1.01E-01 | 0.272941 | 0.237454 | 3685 | 1 |
| R-HSA-1181150 | Signaling by NODAL | 1/55 | 22/10891 | 1.05E-01 | 0.275053 | 0.239292 | 5045 | 1 |
| R-HSA-2979096 | NOTCH2 Activation and Transmission of Signal to the Nucleus | 1/55 | 22/10891 | 1.05E-01 | 0.275053 | 0.239292 | 1272 | 1 |
| R-HSA-5654712 | FRS-mediated FGFR4 signaling | 1/55 | 22/10891 | 1.05E-01 | 0.275053 | 0.239292 | 2264 | 1 |
| R-HSA-977225 | Amyloid fiber formation | 2/55 | 111/10891 | 1.08E-01 | 0.278255 | 0.242078 | 5045/4240 | 2 |
| R-HSA-449836 | Other interleukin signaling | 1/55 | 24/10891 | 1.15E-01 | 0.2883 | 0.250816 | 1435 | 1 |
| R-HSA-452723 | Transcriptional regulation of pluripotent stem cells | 1/55 | 24/10891 | 1.15E-01 | 0.2883 | 0.250816 | 2041 | 1 |
| R-HSA-373760 | L1CAM interactions | 2/55 | 119/10891 | 1.21E-01 | 0.297999 | 0.259254 | 1272/3685 | 2 |
| R-HSA-1971475 | A tetrasaccharide linker sequence is required for GAG synthesis | 1/55 | 26/10891 | 1.23E-01 | 0.297999 | 0.259254 | 375790 | 1 |
| R-HSA-2173788 | Downregulation of TGF-beta receptor signaling | 1/55 | 26/10891 | 1.23E-01 | 0.297999 | 0.259254 | 7048 | 1 |
| R-HSA-1368108 | BMAL1:CLOCK,NPAS2 activates circadian gene expression | 1/55 | 27/10891 | 1.28E-01 | 0.297999 | 0.259254 | 2155 | 1 |
| R-HSA-189445 | Metabolism of porphyrins | 1/55 | 27/10891 | 1.28E-01 | 0.297999 | 0.259254 | 2168 | 1 |
| R-HSA-3000170 | Syndecan interactions | 1/55 | 27/10891 | 1.28E-01 | 0.297999 | 0.259254 | 3685 | 1 |
| R-HSA-5654716 | Downstream signaling of activated FGFR4 | 1/55 | 27/10891 | 1.28E-01 | 0.297999 | 0.259254 | 2264 | 1 |
| R-HSA-1630316 | Glycosaminoglycan metabolism | 2/55 | 124/10891 | 1.30E-01 | 0.29842 | 0.259621 | 375790/2990 | 2 |
| R-HSA-5668914 | Diseases of metabolism | 3/55 | 249/10891 | 1.31E-01 | 0.29842 | 0.259621 | 11095/375790/2990 | 3 |
| R-HSA-5683826 | Surfactant metabolism | 1/55 | 29/10891 | 1.37E-01 | 0.306096 | 0.266298 | 10970 | 1 |
| R-HSA-114608 | Platelet degranulation | 2/55 | 129/10891 | 1.38E-01 | 0.306096 | 0.266298 | 10447/5919 | 2 |
| R-HSA-3000157 | Laminin interactions | 1/55 | 30/10891 | 1.41E-01 | 0.306096 | 0.266298 | 3685 | 1 |
| R-HSA-3928663 | EPHA-mediated growth cone collapse | 1/55 | 30/10891 | 1.41E-01 | 0.306096 | 0.266298 | 2041 | 1 |
| R-HSA-2022928 | HS-GAG biosynthesis | 1/55 | 31/10891 | 1.45E-01 | 0.306096 | 0.266298 | 375790 | 1 |
| R-HSA-2122948 | Activated NOTCH1 Transmits Signal to the Nucleus | 1/55 | 31/10891 | 1.45E-01 | 0.306096 | 0.266298 | 1272 | 1 |
| R-HSA-5339562 | Uptake and actions of bacterial toxins | 1/55 | 31/10891 | 1.45E-01 | 0.306096 | 0.266298 | 5045 | 1 |
| R-HSA-5654733 | Negative regulation of FGFR4 signaling | 1/55 | 31/10891 | 1.45E-01 | 0.306096 | 0.266298 | 2264 | 1 |
| R-HSA-76005 | Response to elevated platelet cytosolic Ca2+ | 2/55 | 134/10891 | 1.47E-01 | 0.306096 | 0.266298 | 10447/5919 | 2 |
| R-HSA-1592389 | Activation of Matrix Metalloproteinases | 1/55 | 33/10891 | 1.54E-01 | 0.312422 | 0.271802 | 5045 | 1 |
| R-HSA-1980145 | Signaling by NOTCH2 | 1/55 | 33/10891 | 1.54E-01 | 0.312422 | 0.271802 | 1272 | 1 |
| R-HSA-8963899 | Plasma lipoprotein remodeling | 1/55 | 33/10891 | 1.54E-01 | 0.312422 | 0.271802 | 5045 | 1 |
| R-HSA-1474228 | Degradation of the extracellular matrix | 2/55 | 140/10891 | 1.57E-01 | 0.313848 | 0.273042 | 11095/5045 | 2 |
| R-HSA-5663084 | Diseases of carbohydrate metabolism | 1/55 | 34/10891 | 1.58E-01 | 0.313848 | 0.273042 | 2990 | 1 |
| R-HSA-73887 | Death Receptor Signalling | 2/55 | 141/10891 | 1.59E-01 | 0.313848 | 0.273042 | 8797/8795 | 2 |
| R-HSA-3781865 | Diseases of glycosylation | 2/55 | 143/10891 | 1.63E-01 | 0.317996 | 0.276651 | 11095/375790 | 2 |
| R-HSA-2173796 | SMAD2/SMAD3:SMAD4 heterotrimer regulates transcription | 1/55 | 36/10891 | 1.67E-01 | 0.322994 | 0.280999 | 5045 | 1 |
| R-HSA-2129379 | Molecules associated with elastic fibres | 1/55 | 37/10891 | 1.71E-01 | 0.322994 | 0.280999 | 3685 | 1 |
| R-HSA-5083635 | Defective B3GALTL causes PpS | 1/55 | 37/10891 | 1.71E-01 | 0.322994 | 0.280999 | 11095 | 1 |
| R-HSA-8964043 | Plasma lipoprotein clearance | 1/55 | 37/10891 | 1.71E-01 | 0.322994 | 0.280999 | 255738 | 1 |
| R-HSA-111465 | Apoptotic cleavage of cellular proteins | 1/55 | 38/10891 | 1.75E-01 | 0.325315 | 0.283019 | 1.01E+08 | 1 |
| R-HSA-5173214 | O-glycosylation of TSR domain-containing proteins | 1/55 | 38/10891 | 1.75E-01 | 0.325315 | 0.283019 | 11095 | 1 |
| R-HSA-140877 | Formation of Fibrin Clot (Clotting Cascade) | 1/55 | 39/10891 | 1.79E-01 | 0.330273 | 0.287332 | 2155 | 1 |
| R-HSA-8853659 | RET signaling | 1/55 | 40/10891 | 1.84E-01 | 0.33511 | 0.29154 | 2674 | 1 |
| R-HSA-3560782 | Diseases associated with glycosaminoglycan metabolism | 1/55 | 41/10891 | 1.88E-01 | 0.337045 | 0.293223 | 375790 | 1 |
| R-HSA-5654743 | Signaling by FGFR4 | 1/55 | 41/10891 | 1.88E-01 | 0.337045 | 0.293223 | 2264 | 1 |
| R-HSA-2173782 | Binding and Uptake of Ligands by Scavenger Receptors | 1/55 | 42/10891 | 1.92E-01 | 0.33888 | 0.29482 | 259 | 1 |
| R-HSA-9696264 | RND3 GTPase cycle | 1/55 | 42/10891 | 1.92E-01 | 0.33888 | 0.29482 | 10970 | 1 |
| R-HSA-9696270 | RND2 GTPase cycle | 1/55 | 43/10891 | 1.96E-01 | 0.339621 | 0.295464 | 10970 | 1 |
| R-HSA-446203 | Asparagine N-linked glycosylation | 3/55 | 304/10891 | 1.98E-01 | 0.339621 | 0.295464 | 432/433/282969 | 3 |
| R-HSA-109704 | PI3K Cascade | 1/55 | 44/10891 | 2.00E-01 | 0.339621 | 0.295464 | 2264 | 1 |
| R-HSA-451927 | Interleukin-2 family signaling | 1/55 | 44/10891 | 2.00E-01 | 0.339621 | 0.295464 | 3600 | 1 |
| R-HSA-975634 | Retinoid metabolism and transport | 1/55 | 44/10891 | 2.00E-01 | 0.339621 | 0.295464 | 375790 | 1 |
| R-HSA-9662851 | Anti-inflammatory response favouring Leishmania parasite infection | 2/55 | 169/10891 | 2.10E-01 | 0.351003 | 0.305367 | 133/5045 | 2 |
| R-HSA-9664433 | Leishmania parasite growth and survival | 2/55 | 169/10891 | 2.10E-01 | 0.351003 | 0.305367 | 133/5045 | 2 |
| R-HSA-6783783 | Interleukin-10 signaling | 1/55 | 47/10891 | 2.12E-01 | 0.35199 | 0.306226 | 1435 | 1 |
| R-HSA-112399 | IRS-mediated signalling | 1/55 | 48/10891 | 2.16E-01 | 0.353267 | 0.307337 | 2264 | 1 |
| R-HSA-6806667 | Metabolism of fat-soluble vitamins | 1/55 | 48/10891 | 2.16E-01 | 0.353267 | 0.307337 | 375790 | 1 |
| R-HSA-1793185 | Chondroitin sulfate/dermatan sulfate metabolism | 1/55 | 50/10891 | 2.24E-01 | 0.363518 | 0.316255 | 375790 | 1 |
| R-HSA-2173793 | Transcriptional activity of SMAD2/SMAD3:SMAD4 heterotrimer | 1/55 | 51/10891 | 2.28E-01 | 0.364504 | 0.317112 | 5045 | 1 |
| R-HSA-3928665 | EPH-ephrin mediated repulsion of cells | 1/55 | 51/10891 | 2.28E-01 | 0.364504 | 0.317112 | 2041 | 1 |
| R-HSA-2428928 | IRS-related events triggered by IGF1R | 1/55 | 52/10891 | 2.32E-01 | 0.365431 | 0.317918 | 2264 | 1 |
| R-HSA-75153 | Apoptotic execution phase | 1/55 | 52/10891 | 2.32E-01 | 0.365431 | 0.317918 | 1.01E+08 | 1 |
| R-HSA-2428924 | IGF1R signaling cascade | 1/55 | 53/10891 | 2.36E-01 | 0.367116 | 0.319385 | 2264 | 1 |
| R-HSA-2404192 | Signaling by Type 1 Insulin-like Growth Factor 1 Receptor (IGF1R) | 1/55 | 54/10891 | 2.40E-01 | 0.367116 | 0.319385 | 2264 | 1 |
| R-HSA-74751 | Insulin receptor signalling cascade | 1/55 | 54/10891 | 2.40E-01 | 0.367116 | 0.319385 | 2264 | 1 |
| R-HSA-9662361 | Sensory processing of sound by outer hair cells of the cochlea | 1/55 | 54/10891 | 2.40E-01 | 0.367116 | 0.319385 | 64787 | 1 |
| R-HSA-196854 | Metabolism of vitamins and cofactors | 2/55 | 190/10891 | 2.49E-01 | 0.378919 | 0.329653 | 375790/2644 | 2 |
| R-HSA-186797 | Signaling by PDGF | 1/55 | 58/10891 | 2.55E-01 | 0.38519 | 0.335109 | 5045 | 1 |
| R-HSA-375276 | Peptide ligand-binding receptors | 2/55 | 201/10891 | 2.70E-01 | 0.40239 | 0.350073 | 6356/58191 | 2 |
| R-HSA-1226099 | Signaling by FGFR in disease | 1/55 | 63/10891 | 2.74E-01 | 0.40239 | 0.350073 | 2264 | 1 |
| R-HSA-446219 | Synthesis of substrates in N-glycan biosythesis | 1/55 | 63/10891 | 2.74E-01 | 0.40239 | 0.350073 | 282969 | 1 |
| R-HSA-1268020 | Mitochondrial protein import | 1/55 | 64/10891 | 2.77E-01 | 0.40239 | 0.350073 | 80273 | 1 |
| R-HSA-1442490 | Collagen degradation | 1/55 | 64/10891 | 2.77E-01 | 0.40239 | 0.350073 | 5045 | 1 |
| R-HSA-9707564 | Cytoprotection by HMOX1 | 1/55 | 64/10891 | 2.77E-01 | 0.40239 | 0.350073 | 2168 | 1 |
| R-HSA-3906995 | Diseases associated with O-glycosylation of proteins | 1/55 | 68/10891 | 2.92E-01 | 0.420739 | 0.366036 | 11095 | 1 |
| R-HSA-9662360 | Sensory processing of sound by inner hair cells of the cochlea | 1/55 | 69/10891 | 2.96E-01 | 0.423139 | 0.368124 | 64787 | 1 |
| R-HSA-400253 | Circadian Clock | 1/55 | 70/10891 | 2.99E-01 | 0.425482 | 0.370162 | 2155 | 1 |
| R-HSA-1980143 | Signaling by NOTCH1 | 1/55 | 74/10891 | 3.13E-01 | 0.442717 | 0.385157 | 1272 | 1 |
| R-HSA-9659379 | Sensory processing of sound | 1/55 | 76/10891 | 3.20E-01 | 0.449658 | 0.391195 | 64787 | 1 |
| R-HSA-2219530 | Constitutive Signaling by Aberrant PI3K in Cancer | 1/55 | 78/10891 | 3.27E-01 | 0.450672 | 0.392077 | 2264 | 1 |
| R-HSA-446193 | Biosynthesis of the N-glycan precursor (dolichol lipid-linked oligosaccharide, LLO) and transfer to a nascent protein | 1/55 | 78/10891 | 3.27E-01 | 0.450672 | 0.392077 | 282969 | 1 |
| R-HSA-74752 | Signaling by Insulin receptor | 1/55 | 78/10891 | 3.27E-01 | 0.450672 | 0.392077 | 2264 | 1 |
| R-HSA-157118 | Signaling by NOTCH | 2/55 | 236/10891 | 3.35E-01 | 0.458969 | 0.399296 | 1272/5045 | 2 |
| R-HSA-381340 | Transcriptional regulation of white adipocyte differentiation | 1/55 | 84/10891 | 3.47E-01 | 0.472657 | 0.411204 | 2167 | 1 |
| R-HSA-190236 | Signaling by FGFR | 1/55 | 87/10891 | 3.57E-01 | 0.48314 | 0.420324 | 2264 | 1 |
| R-HSA-450531 | Regulation of mRNA stability by proteins that bind AU-rich elements | 1/55 | 88/10891 | 3.61E-01 | 0.484571 | 0.421569 | 8741 | 1 |
| R-HSA-9658195 | Leishmania infection | 2/55 | 254/10891 | 3.68E-01 | 0.489911 | 0.426215 | 133/5045 | 2 |
| R-HSA-163125 | Post-translational modification: synthesis of GPI-anchored proteins | 1/55 | 92/10891 | 3.74E-01 | 0.489911 | 0.426215 | 5329 | 1 |
| R-HSA-2682334 | EPH-Ephrin signaling | 1/55 | 92/10891 | 3.74E-01 | 0.489911 | 0.426215 | 2041 | 1 |
| R-HSA-877300 | Interferon gamma signaling | 1/55 | 92/10891 | 3.74E-01 | 0.489911 | 0.426215 | 10437 | 1 |
| R-HSA-373080 | Class B/2 (Secretin family receptors) | 1/55 | 95/10891 | 3.83E-01 | 0.498647 | 0.433815 | 133 | 1 |
| R-HSA-76002 | Platelet activation, signaling and aggregation | 2/55 | 263/10891 | 3.85E-01 | 0.498647 | 0.433815 | 10447/5919 | 2 |
| R-HSA-4420097 | VEGFA-VEGFR2 Pathway | 1/55 | 99/10891 | 3.96E-01 | 0.506627 | 0.440757 | 3685 | 1 |
| R-HSA-9679191 | Potential therapeutics for SARS | 1/55 | 99/10891 | 3.96E-01 | 0.506627 | 0.440757 | 5045 | 1 |
| R-HSA-5689603 | UCH proteinases | 1/55 | 102/10891 | 4.05E-01 | 0.51086 | 0.44444 | 7048 | 1 |
| R-HSA-2219528 | PI3K/AKT Signaling in Cancer | 1/55 | 104/10891 | 4.11E-01 | 0.51086 | 0.44444 | 2264 | 1 |
| R-HSA-1236975 | Antigen processing-Cross presentation | 1/55 | 105/10891 | 4.14E-01 | 0.51086 | 0.44444 | 3685 | 1 |
| R-HSA-2187338 | Visual phototransduction | 1/55 | 105/10891 | 4.14E-01 | 0.51086 | 0.44444 | 375790 | 1 |
| R-HSA-5673001 | RAF/MAP kinase cascade | 2/55 | 280/10891 | 4.15E-01 | 0.51086 | 0.44444 | 2264/2674 | 2 |
| R-HSA-6811558 | PI5P, PP2A and IER3 Regulate PI3K/AKT Signaling | 1/55 | 106/10891 | 4.17E-01 | 0.51086 | 0.44444 | 2264 | 1 |
| R-HSA-500792 | GPCR ligand binding | 3/55 | 467/10891 | 4.22E-01 | 0.51086 | 0.44444 | 133/6356/58191 | 3 |
| R-HSA-194138 | Signaling by VEGF | 1/55 | 108/10891 | 4.23E-01 | 0.51086 | 0.44444 | 3685 | 1 |
| R-HSA-6785807 | Interleukin-4 and Interleukin-13 signaling | 1/55 | 108/10891 | 4.23E-01 | 0.51086 | 0.44444 | 6356 | 1 |
| R-HSA-1912422 | Pre-NOTCH Expression and Processing | 1/55 | 109/10891 | 4.26E-01 | 0.51086 | 0.44444 | 5045 | 1 |
| R-HSA-5684996 | MAPK1/MAPK3 signaling | 2/55 | 286/10891 | 4.26E-01 | 0.51086 | 0.44444 | 2264/2674 | 2 |
| R-HSA-9694516 | SARS-CoV-2 Infection | 2/55 | 288/10891 | 4.29E-01 | 0.51086 | 0.44444 | 375790/5045 | 2 |
| R-HSA-449147 | Signaling by Interleukins | 3/55 | 473/10891 | 4.30E-01 | 0.51086 | 0.44444 | 6356/1435/3600 | 3 |
| R-HSA-5173105 | O-linked glycosylation | 1/55 | 111/10891 | 4.32E-01 | 0.51086 | 0.44444 | 11095 | 1 |
| R-HSA-199418 | Negative regulation of the PI3K/AKT network | 1/55 | 113/10891 | 4.37E-01 | 0.514926 | 0.447977 | 2264 | 1 |
| R-HSA-71387 | Metabolism of carbohydrates | 2/55 | 295/10891 | 4.41E-01 | 0.516931 | 0.449721 | 375790/2990 | 2 |
| R-HSA-1989781 | PPARA activates gene expression | 1/55 | 117/10891 | 4.49E-01 | 0.522727 | 0.454764 | 2168 | 1 |
| R-HSA-400206 | Regulation of lipid metabolism by PPARalpha | 1/55 | 119/10891 | 4.54E-01 | 0.526467 | 0.458017 | 2168 | 1 |
| R-HSA-2132295 | MHC class II antigen presentation | 1/55 | 123/10891 | 4.65E-01 | 0.536444 | 0.466698 | 10437 | 1 |
| R-HSA-1483206 | Glycerophospholipid biosynthesis | 1/55 | 129/10891 | 4.82E-01 | 0.552187 | 0.480393 | 23659 | 1 |
| R-HSA-5683057 | MAPK family signaling cascades | 2/55 | 325/10891 | 4.92E-01 | 0.555589 | 0.483353 | 2264/2674 | 2 |
| R-HSA-166520 | Signaling by NTRKs | 1/55 | 134/10891 | 4.95E-01 | 0.555589 | 0.483353 | 5045 | 1 |
| R-HSA-198933 | Immunoregulatory interactions between a Lymphoid and a non-Lymphoid cell | 1/55 | 134/10891 | 4.95E-01 | 0.555589 | 0.483353 | 11006 | 1 |
| R-HSA-9660821 | ADORA2B mediated anti-inflammatory cytokines production | 1/55 | 134/10891 | 4.95E-01 | 0.555589 | 0.483353 | 133 | 1 |
| R-HSA-162599 | Late Phase of HIV Life Cycle | 1/55 | 136/10891 | 5.00E-01 | 0.558513 | 0.485897 | 5045 | 1 |
| R-HSA-373076 | Class A/1 (Rhodopsin-like receptors) | 2/55 | 335/10891 | 5.08E-01 | 0.564832 | 0.491394 | 6356/58191 | 2 |
| R-HSA-162587 | HIV Life Cycle | 1/55 | 149/10891 | 5.32E-01 | 0.588238 | 0.511757 | 5045 | 1 |
| R-HSA-9018519 | Estrogen-dependent gene expression | 1/55 | 150/10891 | 5.35E-01 | 0.588238 | 0.511757 | 7031 | 1 |
| R-HSA-3700989 | Transcriptional Regulation by TP53 | 2/55 | 362/10891 | 5.50E-01 | 0.600292 | 0.522244 | 8797/8795 | 2 |
| R-HSA-418555 | G alpha (s) signalling events | 1/55 | 157/10891 | 5.51E-01 | 0.600292 | 0.522244 | 133 | 1 |
| R-HSA-9609507 | Protein localization | 1/55 | 163/10891 | 5.65E-01 | 0.6121 | 0.532517 | 80273 | 1 |
| R-HSA-9679506 | SARS-CoV Infections | 2/55 | 376/10891 | 5.71E-01 | 0.616047 | 0.53595 | 375790/5045 | 2 |
| R-HSA-9711123 | Cellular response to chemical stress | 1/55 | 194/10891 | 6.29E-01 | 0.675038 | 0.587271 | 2168 | 1 |
| R-HSA-913531 | Interferon Signaling | 1/55 | 200/10891 | 6.40E-01 | 0.683825 | 0.594916 | 10437 | 1 |
| R-HSA-5663202 | Diseases of signal transduction by growth factor receptors and second messengers | 2/55 | 433/10891 | 6.49E-01 | 0.689743 | 0.600065 | 2264/7048 | 2 |
| R-HSA-1483257 | Phospholipid metabolism | 1/55 | 212/10891 | 6.62E-01 | 0.700081 | 0.609059 | 23659 | 1 |
| R-HSA-416476 | G alpha (q) signalling events | 1/55 | 216/10891 | 6.69E-01 | 0.703997 | 0.612466 | 2520 | 1 |
| R-HSA-8939211 | ESR-mediated signaling | 1/55 | 223/10891 | 6.80E-01 | 0.712963 | 0.620266 | 7031 | 1 |
| R-HSA-162906 | HIV Infection | 1/55 | 231/10891 | 6.93E-01 | 0.723073 | 0.629061 | 5045 | 1 |
| R-HSA-8878171 | Transcriptional regulation by RUNX1 | 1/55 | 239/10891 | 7.06E-01 | 0.732552 | 0.637308 | 1.01E+08 | 1 |
| R-HSA-1257604 | PIP3 activates AKT signaling | 1/55 | 267/10891 | 7.46E-01 | 0.770155 | 0.670021 | 2264 | 1 |
| R-HSA-5688426 | Deubiquitination | 1/55 | 298/10891 | 7.83E-01 | 0.802861 | 0.698476 | 7048 | 1 |
| R-HSA-9006931 | Signaling by Nuclear Receptors | 1/55 | 299/10891 | 7.85E-01 | 0.802861 | 0.698476 | 7031 | 1 |
| R-HSA-9006925 | Intracellular signaling by second messengers | 1/55 | 309/10891 | 7.95E-01 | 0.810266 | 0.704917 | 2264 | 1 |
| R-HSA-418594 | G alpha (i) signalling events | 1/55 | 318/10891 | 8.05E-01 | 0.816019 | 0.709923 | 58191 | 1 |
| R-HSA-71291 | Metabolism of amino acids and derivatives | 1/55 | 374/10891 | 8.54E-01 | 0.862257 | 0.750149 | 5092 | 1 |
| R-HSA-983169 | Class I MHC mediated antigen processing & presentation | 1/55 | 381/10891 | 8.60E-01 | 0.863575 | 0.751296 | 3685 | 1 |
| R-HSA-9012999 | RHO GTPase cycle | 1/55 | 449/10891 | 9.02E-01 | 0.901866 | 0.784608 | 10970 | 1 |

Reactome pathway analysis was performed on significant trauma-affective disorder mediators identified at baseline. Significant pathways with FDR-corrected p-values are reported, along with enrichment statistics, in the table.

**Table S32: Explained variance of resilience scores by feature categories in NIPLS model**

| **Category** | **Best components number** | **R2 in training set** | **R2 in validation set** |
| --- | --- | --- | --- |
| Demographic | 1 | 0.02037347 | 0.02382722 |
| Economics | 1 | 0.01687153 | 0.01261071 |
| Family-support | 2 | 0.02800392 | 0.03103709 |
| Social-support | 1 | 0.05364475 | 0.05333132 |
| Early-risk | 1 | 0.0276377 | 0.02967108 |
| Lifestyle | 1 | 0.01022714 | 0.01112385 |
| Personality | 5 | 0.18771391 | 0.19672854 |
| Satisfaction | 1 | 0.08105012 | 0.09013818 |

To evaluate the contribution of different feature categories to self-reported resilience scores, 49 features were organized into 7 categories, and separate models were built for each category using NIPLS regression. The optimal number of components and the explained variance (R²) for the training and validation sets are reported for each category in the table.

**Table S33: Feature weights for resilience score prediction**

| **Factors** | **Mean** | **SD** | **Category** |
| --- | --- | --- | --- |
| Sex | 7.74E-02 | 0.00481599 | Demographic |
| age_BL | 2.25E-02 | 0.004359363 | Demographic |
| Education_year | -2.02E-02 | 0.004777696 | Demographic |
| HH_Num_Vehicle_BL | 8.74E-03 | 0.004368457 | Economics |
| HH_Income_BL | 2.82E-02 | 0.004086198 | Economics |
| HH_Own_Rent_BL | 2.75E-02 | 0.004717946 | Economics |
| Able_Pay_Rent_Mortgage_FU1 | 8.04E-03 | 0.005157299 | Economics |
| Financial_Difficulties | 6.33E-03 | 0.00475508 | Economics |
| IMD | 2.17E-02 | 0.004838811 | Economics |
| Num_People_Living_BL | 1.01E-03 | 0.003301993 | Family-support |
| Been_In_Confiding_Relationship_FU1 | 1.33E-02 | 0.004810966 | Family-support |
| Belittlement_Adult_FU1 | -3.81E-02 | 0.004926123 | Family-support |
| Marital_Separation | 2.48E-02 | 0.005160502 | Family-support |
| Live_with_partner | -1.49E-02 | 0.003709396 | Family-support |
| Live_with_children | 9.14E-03 | 0.00403233 | Family-support |
| Live_with_siblings | -7.13E-03 | 0.00574698 | Family-support |
| Live_with_parents | -8.42E-03 | 0.005280206 | Family-support |
| Live_with_grandchild | 2.19E-03 | 0.004746495 | Family-support |
| Live_with_related | -1.16E-02 | 0.005518201 | Family-support |
| Live_with_unrelated | 3.07E-03 | 0.004876601 | Family-support |
| Live_alone | 1.01E-02 | 0.003539261 | Family-support |
| Social_Freq_Visits_BL | -8.54E-03 | 0.004577033 | Social-support |
| Social_Able_Confide_BL | 8.08E-03 | 0.004789241 | Social-support |
| Loneliness_BL | -4.38E-02 | 0.004629478 | Social-support |
| Num_social_activity | -1.98E-02 | 0.00478076 | Social-support |
| Breastfed_Baby_BL | 3.37E-05 | 0.004919071 | Early-risk |
| Comp_Body_Size_Age_10_BL | -1.19E-02 | 0.005306221 | Early-risk |
| Comp_Height_Size_Age_10_BL | 1.65E-03 | 0.004827606 | Early-risk |
| Maternal_Smoking_Birth_BL | 1.56E-02 | 0.004998607 | Early-risk |
| Felt_Loved_As_Child_FU1 | 3.37E-02 | 0.00450174 | Early-risk |
| Phys_Abused_As_Child_FU1 | 4.71E-03 | 0.004823826 | Early-risk |
| Felt_Hated_As_Child_FU1 | -2.03E-02 | 0.004786496 | Early-risk |
| Sex_Molested_As_Child_FU1 | -5.10E-03 | 0.005284368 | Early-risk |
| Someone_Take_To_Doctor_As_Child_FU1 | -5.98E-03 | 0.004909531 | Early-risk |
| MET_Minutes_Per_Week_Moderate_Activity_BL | 7.25E-03 | 0.004790243 | Lifestyle |
| MET_Minutes_Per_Week_Vigorous_Activity_BL | 2.82E-02 | 0.004836553 | Lifestyle |
| MET_Minutes_Per_Week_Walking_BL | 1.58E-02 | 0.004785194 | Lifestyle |
| Morning_Evening_Person_BL | -2.83E-02 | 0.005018053 | Lifestyle |
| TV_Time_BL | 1.07E-02 | 0.004808499 | Lifestyle |
| Computer_Time_BL | 2.11E-02 | 0.004748469 | Lifestyle |
| Big5_warmth | 1.26E-01 | 0.003564795 | Personality |
| Big5_diligence | -3.18E-02 | 0.004553364 | Personality |
| Big5_nervousness | -1.53E-01 | 0.003872264 | Personality |
| Big5_curiosity | 1.08E-01 | 0.004171304 | Personality |
| Big5_sociability | 7.75E-02 | 0.003900535 | Personality |
| Health_Satisfaction_BL | 7.26E-02 | 0.004818551 | Satisfaction |
| Family_Relationship_Satisfaction_BL | 3.86E-02 | 0.004620893 | Satisfaction |
| Friendships_Satisfaction_BL | 6.28E-02 | 0.004624751 | Satisfaction |
| Financial_Situation_Satisfaction_BL | 2.47E-02 | 0.004413889 | Satisfaction |

To assess the contribution and stability of features in predicting self-reported resilience scores, feature weights were estimated using 1000 bootstrap samples in the UKB dataset. The table reports the mean weights and standard deviations (SD) for each feature, reflecting their importance and variability in the model.

**Table S34: Regression analysis to validate predicted resilience scores on baseline affective symptoms**

| **Term** | **estimate** | **std.error** | **statistic** | **p-value** | **conf_int[2.5 %]** | **conf_int[97.5 %]** |
| --- | --- | --- | --- | --- | --- | --- |
| (Intercept) | 6.927740537 | 0.188759007 | 36.70150985 | 2.78E-271 | 6.55771975 | 7.297761322 |
| Resilience(Medium) | -1.167314654 | 0.05370793 | -21.73449347 | 1.29E-101 | -1.27259731 | -1.062031993 |
| Resilience(High) | -1.667847765 | 0.055242933 | -30.19115185 | 4.86E-189 | -1.77613946 | -1.559556067 |
| Trauma exposure | 0.452377459 | 0.03504553 | 12.9082783 | 1.02E-37 | 0.38367836 | 0.521076564 |
| Age | -0.02523917 | 0.002319321 | -10.88213894 | 2.25E-27 | -0.02978569 | -0.020692648 |
| Sex(Male) | 0.14273525 | 0.037099623 | 3.84735044 | 1.20E-04 | 0.07000955 | 0.215460954 |
| Ethnic(Asian) | -0.092868407 | 0.139503673 | -0.66570582 | 5.06E-01 | -0.36633487 | 0.180598059 |
| Ethnic(Black) | -0.003362573 | 0.199787027 | -0.01683079 | 9.87E-01 | -0.39500138 | 0.388276237 |
| Ethnic(Other) | 0.346629344 | 0.168362846 | 2.05882327 | 3.95E-02 | 0.01659078 | 0.676667913 |
| BMI | 0.022225407 | 0.003974488 | 5.59201702 | 2.32E-08 | 0.01443429 | 0.030016523 |
| Education | -0.009062512 | 0.004321882 | -2.09689013 | 3.60E-02 | -0.01753462 | -0.000590407 |
| Resilience(Medium):Trauma exposure | -0.200406791 | 0.053042891 | -3.77820266 | 1.59E-04 | -0.30438579 | -0.096427795 |
| Resilience(High):Trauma exposure | -0.289982858 | 0.055636673 | -5.21208121 | 1.92E-07 | -0.3990464 | -0.180919318 |

To validate whether predicted resilience scores reflect individual resilience by protecting mental health under trauma exposure, individuals were grouped into high, medium, and low resilience (top 33%, middle, and bottom 33%) based on model predictions at baseline. Linear regression was conducted with baseline PHQ-4 scores as the dependent variable, including trauma exposure, resilience, their interaction, and covariates as independent variables. Beta coefficients and p-values for main effects and the resilience-trauma interaction are reported in the table.

**Table S35: Regression analysis to validate predicted resilience scores on follow-up 1 affective symptoms**

| **Term** | **estimate** | **std.error** | **statistic** | **p-value** | **conf_int[2.5 %]** | **conf_int[97.5 %]** |
| --- | --- | --- | --- | --- | --- | --- |
| **(Intercept)** | 8.06003141 | 0.321812441 | 25.045742 | 5.38E-133 | 7.42918826 | 8.69087455 |
| **Resilience(Medium)** | -1.78506561 | 0.074013155 | -24.118221 | 8.05E-124 | -1.93015226 | -1.63997895 |
| **Resilience(High)** | -2.40931593 | 0.07721328 | -31.203388 | 5.14E-201 | -2.56067574 | -2.25795613 |
| **Trauma exposure** | 1.39307816 | 0.258369365 | 5.391809 | 7.19E-08 | 0.88660133 | 1.89955498 |
| **Age** | -0.06677392 | 0.003980605 | -16.774818 | 5.06E-62 | -0.07457702 | -0.05897081 |
| **Sex(Male)** | 0.44086225 | 0.063776537 | 6.912609 | 5.15E-12 | 0.31584225 | 0.56588225 |
| **Ethnic(Asian)** | -1.03720332 | 0.241818795 | -4.289176 | 1.82E-05 | -1.51123636 | -0.56317028 |
| **Ethnic(Black)** | -1.03319107 | 0.340339704 | -3.035764 | 2.41E-03 | -1.70035287 | -0.36602926 |
| **Ethnic(Other)** | -0.46053742 | 0.293049579 | -1.571534 | 1.16E-01 | -1.03499724 | 0.11392241 |
| **BMI** | 0.04724443 | 0.006823413 | 6.92387 | 4.76E-12 | 0.03386861 | 0.06062024 |
| **Education** | -0.05186543 | 0.007432472 | -6.97822 | 3.25E-12 | -0.06643517 | -0.03729569 |
| **Resilience(Medium):Trauma exposure** | -0.78248102 | 0.382958585 | -2.043252 | 4.11E-02 | -1.53318785 | -0.03177418 |
| **Resilience(High):Trauma exposure** | -1.04386597 | 0.393889807 | -2.650147 | 8.06E-03 | -1.81600108 | -0.27173086 |

To confirm whether predicted resilience scores reflect individual resilience by protecting against affective symptoms under trauma exposure, individuals were grouped into high, medium, and low resilience (top 33%, middle, and bottom 33%) based on model prediction. Linear regression was conducted with follow-up 1 affective symptoms (combined PHQ-9 and GAD-7 scores) as the dependent variable, including trauma exposure, resilience, their interaction, and covariates as independent variables. Beta coefficients and p-values for main effects and the resilience-trauma interaction are reported in the table.

**Table S36: Regression analysis to validate predicted resilience scores on follow-up 2 affective symptoms**

| **Term** | **estimate** | **std.error** | **statistic** | **p-value** | **conf_int[2.5 %]** | **conf_int[97.5 %]** |
| --- | --- | --- | --- | --- | --- | --- |
| (Intercept) | 6.81433788 | 0.320063552 | 21.2905776 | 1.13E-97 | 6.18692224 | 7.44175353 |
| Resilience(Medium) | -1.57497389 | 0.075758247 | -20.7894713 | 2.41E-93 | -1.72348162 | -1.42646617 |
| Resilience(High) | -2.20397274 | 0.078639688 | -28.0262141 | 2.35E-164 | -2.35812891 | -2.04981657 |
| Trauma exposure | 1.23411743 | 0.137696135 | 8.9626149 | 3.96E-19 | 0.96419382 | 1.50404104 |
| Age | -0.05497367 | 0.003962182 | -13.8745956 | 3.13E-43 | -0.06274068 | -0.04720667 |
| Sex(Male) | 0.44045641 | 0.063403449 | 6.946884 | 4.05E-12 | 0.31616761 | 0.56474521 |
| Ethnic(Asian) | -1.39943082 | 0.240465781 | -5.8196672 | 6.14E-09 | -1.87081218 | -0.92804946 |
| Ethnic(Black) | -0.98993019 | 0.343744764 | -2.8798408 | 3.99E-03 | -1.66376774 | -0.31609263 |
| Ethnic(Other) | 0.16071648 | 0.288288867 | 0.5574842 | 5.77E-01 | -0.40441173 | 0.7258447 |
| BMI | 0.03259441 | 0.006788512 | 4.8014065 | 1.61E-06 | 0.01928699 | 0.04590182 |
| Education | -0.03610918 | 0.007395098 | -4.8828531 | 1.07E-06 | -0.05060567 | -0.02161268 |
| Resilience(Medium):Trauma exposure | -0.10785314 | 0.212790515 | -0.5068513 | 6.12E-01 | -0.5249831 | 0.30927682 |
| Resilience(High):Trauma exposure | -0.55014171 | 0.234855265 | -2.3424713 | 1.92E-02 | -1.01052486 | -0.08975856 |

To confirm whether predicted resilience scores reflect individual resilience by protecting against affective symptoms under trauma exposure, individuals were grouped into high, medium, and low resilience (top 33%, middle, and bottom 33%) based on model prediction. Linear regression was conducted with follow-up 2 affective symptoms (combined PHQ-9 and GAD-7 scores) as the dependent variable, including trauma exposure, resilience, their interaction, and covariates as independent variables. Beta coefficients and p-values for main effects and the resilience-trauma interaction are reported in the table.

**Table S37: Regression analysis of predicted resilience scores on PHQ score changes from follow-up 1 to follow-up 2**

| **Term** | **PHQ_Change** | | | **PHQ Change（adjuested FU1 symptome）** | | | **PHQ Change（matched FU1 symptome）** | | |
| --- | --- | --- | --- | --- | --- | --- | --- | --- | --- |
| **Beta** | **T_value** | **p-value** | **Beta** | **T_value** | **p-value** | **Beta** | **T_value** | **p-value** |
| (Intercept) | -2.02 (-2.79, -1.25) | -5.13593946 | 2.88E-07 | 1.46 (0.76, 2.15) | 4.0869003 | 4.42E-05 | 0.07 (-2.75, 2.89) | 0.04624217 | 9.63E-01 |
| Resilience(Medium) | 0.19 (0.02, 0.37) | 2.13810878 | 3.25E-02 | -0.83 (-0.99, -0.67) | -10.1626423 | 4.16E-24 |  |  |  |
| Resilience(High) | 0.1 (-0.08, 0.29) | 1.12606089 | 2.60E-01 | -1.31 (-1.48, -1.13) | -14.8469446 | 3.60E-49 | -1.17 (-1.67, -0.66) | -4.51356933 | 8.05E-06 |
| Age | 0.02 (0.01, 0.03) | 3.75785774 | 1.73E-04 | -0.01 (-0.02, 0) | -2.725752 | 6.43E-03 | 0.01 (-0.02, 0.05) | 0.78783834 | 4.31E-01 |
| Sex(Male) | 0.01 (-0.15, 0.16) | 0.08117034 | 9.35E-01 | -0.01 (-0.14, 0.13) | -0.1125709 | 9.10E-01 | -0.05 (-0.58, 0.47) | -0.20582375 | 8.37E-01 |
| Ethnic(Asian) | -0.33 (-0.91, 0.24) | -1.13729464 | 2.55E-01 | -0.58 (-1.09, -0.07) | -2.2362895 | 2.54E-02 | -0.05 (-1.68, 1.59) | -0.05401238 | 9.57E-01 |
| Ethnic(Black) | -0.18 (-1, 0.64) | -0.428969 | 6.68E-01 | -0.53 (-1.25, 0.2) | -1.4285523 | 1.53E-01 | 0.44 (-1.87, 2.74) | 0.37424463 | 7.08E-01 |
| Ethnic(Other) | 0.12 (-0.58, 0.81) | 0.32996685 | 7.41E-01 | 0.28 (-0.34, 0.89) | 0.8827747 | 3.77E-01 | 0.72 (-1.81, 3.24) | 0.55906402 | 5.76E-01 |
| BMI | -0.01 (-0.03, 0) | -1.57650267 | 1.15E-01 | 0.03 (0.02, 0.04) | 4.0388593 | 5.42E-05 | -0.04 (-0.11, 0.02) | -1.33598747 | 1.82E-01 |
| Education | 0.01 (0, 0.03) | 1.59370087 | 1.11E-01 | -0.01 (-0.03, 0) | -1.8045107 | 7.12E-02 | 0.01 (-0.07, 0.08) | 0.13537299 | 8.92E-01 |

To assess the impact of predicted resilience scores on changes in PHQ scores from follow-up 1 to follow-up 2, linear regression analyses were conducted while controlling for follow-up 1 affective symptoms (PHQ-9 and GAD-7). Propensity score matching was applied to balance covariates and follow-up 1 PHQ-9 and GAD-7 scores between resilient and vulnerable groups. Results from three regression models, including beta coefficients and p-values for main effects, are reported in the table.

**Table S38: Regression analysis of predicted resilience scores on GAD score changes from follow-up 1 to follow-up 2**

| **Term** | **GAD_Change** | | | **GAD Change（adjuested FU1 symptome）** | | | **GAD Change（matched FU1 symptome）** | | |
| --- | --- | --- | --- | --- | --- | --- | --- | --- | --- |
| **Beta** | **T_value** | **p-value** | **Beta** | **T_value** | **p-value** | **Beta** | **T_value** | **p-value** |
| (Intercept) | -0.91 (-1.66, -0.16) | -2.369979 | 0.017814161 | 2.81 (2.15, 3.47) | 8.3648052 | 7.11E-17 | -0.46 (-3.13, 2.22) | -0.33517752 | 7.38E-01 |
| Resilience(Medium) | 0.15 (-0.02, 0.33) | 1.772643 | 0.07632839 | -0.94 (-1.09, -0.78) | -12.1043467 | 2.04E-33 | —— | —— | —— |
| Resilience(High) | 0.16 (-0.01, 0.34) | 1.805241 | 0.071076859 | -1.31 (-1.47, -1.14) | -15.7965808 | 2.53E-55 | -1.04 (-1.52, -0.56) | -4.23130595 | 2.79E-05 |
| Age | 0.02 (0.01, 0.03) | 3.330199 | 0.000872013 | -0.01 (-0.02, 0) | -2.9154698 | 3.56E-03 | 0.03 (0, 0.06) | 1.72491004 | 8.52E-02 |
| Sex(Male) | 0.09 (-0.06, 0.24) | 1.172528 | 0.241022345 | 0.01 (-0.11, 0.14) | 0.220261 | 8.26E-01 | -0.64 (-1.13, -0.14) | -2.51683693 | 1.22E-02 |
| Ethnic(Asian) | -0.63 (-1.19, -0.07) | -2.191684 | 0.028432832 | -0.72 (-1.2, -0.23) | -2.9069442 | 3.66E-03 | -0.91 (-2.46, 0.65) | -1.14676319 | 2.52E-01 |
| Ethnic(Black) | -0.08 (-0.89, 0.72) | -0.206458 | 0.836438728 | -0.22 (-0.9, 0.47) | -0.6259634 | 5.31E-01 | 0.71 (-1.48, 2.89) | 0.63625197 | 5.25E-01 |
| Ethnic(Other) | 1.13 (0.44, 1.81) | 3.240487 | 0.001198445 | 0.93 (0.35, 1.51) | 3.1400482 | 1.70E-03 | -1.61 (-4.01, 0.78) | -1.32564169 | 1.86E-01 |
| BMI | -0.02 (-0.04, 0) | -2.505337 | 0.012254446 | -0.01 (-0.02, 0.01) | -0.9546801 | 3.40E-01 | 0 (-0.06, 0.06) | -0.01928887 | 9.85E-01 |
| Education | 0.02 (0, 0.04) | 2.233423 | 0.025550359 | -0.01 (-0.03, 0) | -1.8588512 | 6.31E-02 | 0.01 (-0.06, 0.07) | 0.15609133 | 8.76E-01 |

To assess the impact of predicted resilience scores on changes in GAD scores from follow-up 1 to follow-up 2, linear regression analyses were conducted while controlling for follow-up 1 affective symptoms (PHQ-9 and GAD-7). Propensity score matching was applied to balance covariates and follow-up 1 PHQ-9 and GAD-7 scores between resilient and vulnerable groups. Results from three regression models, including beta coefficients and p-values for main effects, are reported in the table.

**Table S39: Odds ratios (OR) for internalizing disorder incidence in baseline-defined groups (full model) at FU1–FU3**

| **Comparison Groups** | **Time point** | **OR** | **CI lower** | **CI upper** | **pdifference** |
| --- | --- | --- | --- | --- | --- |
| Outcome-based resilient group  vs.  Health control group | FU1 | 1.8432 | 1.094505 | 3.158721 | 2.31E-02 |
| FU2 | 2.438719 | 1.454888 | 4.194609 | 9.16E-04 |
| FU3 | 1.644299 | 1.056035 | 2.58152 | 2.88E-02 |
| Model-based resilient group  vs.  Health control group | FU1 | 0.768 | 0.278253 | 1.816321 | 5.75E-01 |
| FU2 | 0.406732 | 0.094971 | 1.202403 | 1.50E-01 |
| FU3 | 1.100402 | 0.542513 | 2.109755 | 7.81E-01 |
| Model-based vulnerable group  vs.  Health control group | FU1 | 2.842597 | 1.473548 | 5.417412 | 1.56E-03 |
| FU2 | 4.202899 | 2.24205 | 7.911501 | 7.29E-06 |
| FU3 | 2.609524 | 1.478155 | 4.560846 | 8.12E-04 |
| Model-based vulnerable group  vs.  Model-based vulnerable group | FU1 | 3.701299 | 1.481779 | 10.58623 | 7.99E-03 |
| FU2 | 10.33333 | 3.440121 | 44.68967 | 2.21E-04 |
| FU3 | 2.371429 | 1.15178 | 5.088579 | 2.18E-02 |

Odds ratios (ORs) with 95% confidence intervals compare internalizing disorder incidence for outcome-based resilient, model-based resilient, model-based vulnerable, and health control groups, defined at baseline, across FU1–FU3.

**Table S40: Odds ratios (OR) for internalizing disorder incidence in FU1-defined groups (full model) at FU2–FU3**

| **Comparison Groups** | **Time point** | **OR** | **CI lower** | **CI upper** | **pdifference** |
| --- | --- | --- | --- | --- | --- |
| Outcome-based resilient group  vs.  Health control group | FU2 | 2.59875 | 1.32254 | 5.199537 | 0.005865 |
| FU3 | 1.442708 | 0.836483 | 2.464222 | 0.181852 |
| Model-based resilient group  vs.  Health control group | FU2 | 0.331473 | 0.018183 | 1.675048 | 0.28876 |
| FU3 | 1.256236 | 0.51705 | 2.742826 | 0.58745 |
| Model-based vulnerable group  vs.  Health control group | FU2 | 3.949468 | 1.643594 | 9.120395 | 0.001497 |
| FU3 | 1.839976 | 0.841697 | 3.774038 | 0.108133 |
| Model-based vulnerable group  vs.  Model-based vulnerable group | FU2 | 11.91489 | 2.164858 | 222.6672 | 0.020241 |
| FU3 | 1.464674 | 0.54465 | 4.091096 | 0.452498 |

Odds ratios (ORs) with 95% confidence intervals compare internalizing disorder incidence for outcome-based resilient, model-based resilient, model-based vulnerable, and health control groups, defined at FU1, across FU2–FU3.

**Table S41: Odds ratios (OR) for internalizing disorder incidence in FU2-defined groups (full model) at FU3**

| **Comparison Groups** | **Time point** | **OR** | **CI lower** | **CI upper** | **pdifference** |
| --- | --- | --- | --- | --- | --- |
| Outcome-based resilient group  vs.  Health control group | FU3 | 1.005169 | 0.54007 | 1.854557 | 0.986856 |
| Model-based resilient group  vs.  Health control group | FU3 | 1.010847 | 0.387605 | 2.34072 | 0.980965 |
| Model-based vulnerable group  vs.  Health control group | FU3 | 1.893333 | 0.869018 | 3.944255 | 0.095412 |
| Model-based vulnerable group  vs.  Model-based vulnerable group | FU3 | 1.873016 | 0.700903 | 5.35824 | 0.219878 |

Odds ratios (ORs) with 95% confidence intervals compare internalizing disorder incidence for outcome-based resilient, model-based resilient, model-based vulnerable, and health control groups, defined at FU2, at FU3.

**Table S42: Non-inferiority comparison of internalizing disorder incidence between model-based resilient and low-risk groups (full model)**

| **Time point** | **Model resilient group**  **Psych. Dx %** | **Model resilient group**  **(n)** | **Low-risk group**  **Psych. Dx %** | **Low-risk group**  **(n)** | **SESOI** | **OR** | **CI lower** | **CI upper** | **pdifference** | **pnon-inferiority test** |
| --- | --- | --- | --- | --- | --- | --- | --- | --- | --- | --- |
| **Group identified at FU1** | | | | | | | | | | |
| FU2 | 0.01754386 | 57 | 0.05111821 | 313 | 3.62 | 0.3314732 | 0.06082833 | 1.806305 | 0.288759737 | 0.002858424 |
| FU3 | 0.14035088 | 57 | 0.11501597 | 313 | 2.73 | 1.2562358 | 0.56143687 | 2.810874 | 0.58744982 | 0.029451441 |
| **Group identified at FU2** | | | | | | | | | | |
| FU3 | 0.1060606 | 66 | 0.105042 | 238 | 2.75 | 1.010847 | 0.4263163 | 2.396841 | 0.98096499 | 0.01154342 |

To evaluate whether individuals in the model-based resilient group exhibit internalizing disorder incidence rates non-inferior to those in the low-risk group, non-inferiority tests were conducted. Incidence rates at follow-up 2 and follow-up 3 were compared for groups defined at follow-up 1, and at follow-up 3 for groups defined at follow-up 2. The table reports incidence rates, differences, and non-inferiority test results.

**Table S43: Odds ratios (OR) for internalizing disorder incidence in baseline-defined groups (personality-based resilience model) at FU1–FU3**

| **Comparison Groups** | **Time point** | **OR** | **CI lower** | **CI upper** | **pdifference** |
| --- | --- | --- | --- | --- | --- |
| Outcome-based resilient group  vs.  Health control group | FU1 | 1.8432 | 1.094505 | 3.158721 | 2.31E-02 |
| FU2 | 2.438719 | 1.454888 | 4.194609 | 9.16E-04 |
| FU3 | 1.644299 | 1.056035 | 2.58152 | 2.88E-02 |
| Model-based resilient group  vs.  Health control group | FU1 | 0.768 | 0.278253 | 1.816321 | 5.75E-01 |
| FU2 | 0.991695 | 0.382805 | 2.278847 | 9.85E-01 |
| FU3 | 1.301045 | 0.665082 | 2.436182 | 4.24E-01 |
| Model-based vulnerable group  vs.  Health control group | FU1 | 2.658462 | 1.364286 | 5.100256 | 3.46E-03 |
| FU2 | 4.439682 | 2.381592 | 8.326425 | 2.73E-06 |
| FU3 | 2.088704 | 1.153369 | 3.714114 | 1.32E-02 |
| Model-based vulnerable group  vs.  Model-based vulnerable group | FU1 | 3.461539 | 1.375788 | 9.940751 | 1.23E-02 |
| FU2 | 4.476861 | 1.918962 | 11.763 | 1.02E-03 |
| FU3 | 1.605405 | 0.780487 | 3.378143 | 2.03E-01 |

Odds ratios (ORs) with 95% confidence intervals compare internalizing disorder incidence for outcome-based resilient, model-based resilient, model-based vulnerable, and health control groups, defined at baseline (personality-based resilience model), across FU1–FU3.

**Table S44: Odds ratios (OR) for internalizing disorder incidence in FU1-defined groups (personality-based resilience model) at FU2–FU3**

| **Comparison Groups** | **Time point** | **OR** | **CI lower** | **CI upper** | **pdifference** |
| --- | --- | --- | --- | --- | --- |
| Outcome-based resilient group  vs.  Health control group | FU2 | 2.59875 | 1.32254 | 5.199537 | 0.005865 |
| FU3 | 1.442708 | 0.836483 | 2.464222 | 0.181852 |
| Model-based resilient group  vs.  Health control group | FU2 | 1.03125 | 0.234223 | 3.227438 | 0.962025 |
| FU3 | 1.077222 | 0.420341 | 2.424707 | 0.865971 |
| Model-based vulnerable group  vs.  Health control group | FU2 | 4.438859 | 1.896304 | 10.09554 | 0.000419 |
| FU3 | 1.637116 | 0.727757 | 3.416178 | 0.207091 |
| Model-based vulnerable group  vs.  Model-based vulnerable group | FU2 | 4.304348 | 1.255143 | 19.8813 | 0.032217 |
| FU3 | 1.519757 | 0.539385 | 4.495803 | 0.432329 |

Odds ratios (ORs) with 95% confidence intervals compare internalizing disorder incidence for outcome-based resilient, model-based resilient, model-based vulnerable, and health control groups, defined at FU1 (personality-based resilience model), across FU2–FU3.

**Table S45: Odds ratios (OR) for internalizing disorder incidence in FU2-defined groups (personality-based resilience model) at FU3**

| **Comparison Groups** | **Time point** | **OR** | **CI lower** | **CI upper** | **pdifference** |
| --- | --- | --- | --- | --- | --- |
| Outcome-based resilient group  vs.  Health control group | FU3 | 1.005169 | 0.54007 | 1.854557 | 0.986856 |
| Model-based resilient group  vs.  Health control group | FU3 | 1.010847 | 0.387605 | 2.34072 | 0.980965 |
| Model-based vulnerable group  vs.  Health control group | FU3 | 1.010847 | 0.387605 | 2.34072 | 0.980965 |
| Model-based vulnerable group  vs.  Model-based vulnerable group | FU3 | 1 | 0.323446 | 3.091705 | 1 |

Odds ratios (ORs) with 95% confidence intervals compare internalizing disorder incidence for outcome-based resilient, model-based resilient, model-based vulnerable, and health control groups, defined at FU2 (personality-based resilience model), at FU3.

**Table S46: Non-inferiority comparison of internalizing disorder incidence using personality-based resilience model**

| **Time point** | **Model resilient group**  **Psych. Dx %** | **Model resilient group**  **(n)** | **Low-risk group**  **Psych. Dx %** | **Low-risk group**  **(n)** | **SESOI** | **OR** | **CI lower** | **CI upper** | **pdifference** | **pnon-inferiority test** |
| --- | --- | --- | --- | --- | --- | --- | --- | --- | --- | --- |
| **Group identified at BL** | | | | | | | | | | |
| FU1 | 0.0625 | 96 | 0.0798722 | 313 | 2.61 | 0.768 | 0.3144473 | 1.875749 | 0.575 | 0.003626 |
| FU2 | 0.07291667 | 96 | 0.07348243 | 313 | 2.68 | 0.9916952 | 0.4215588 | 2.332911 | 0.985 | 0.011371 |
| FU3 | 0.15625 | 96 | 0.12460064 | 313 | 2.3 | 1.3010446 | 0.6878503 | 2.46088 | 0.424 | 0.039882 |
| **Group identified at FU1** | | | | | | | | | | |
| FU1 | 0.05263158 | 57 | 0.05111821 | 313 | 3.62 | 1.03125 | 0.3140352 | 3.386489 | 0.962 | 0.019232 |
| FU1 | 0.12280702 | 57 | 0.11501597 | 313 | 2.73 | 1.077222 | 0.4645639 | 2.497843 | 0.865 | 0.015115 |
| **Group identified at FU2** | | | | | | | | | | |
| FU1 | 0.1060606 | 66 | 0.105042 | 238 | 2.75 | 1.010847 | 0.4263163 | 2.396841 | 0.981 | 0.011543 |

To determine whether the personality-based resilience group, predicted using personality features, has internalizing disorder incidence rates non-inferior to the low-risk group, non-inferiority tests were conducted. Incidence rates at follow-up 1, follow-up 2, and follow-up 3 were compared for groups defined at baseline, incidence rates at follow-up 2 and follow-up 3 for groups defined at follow-up 1, and at follow-up 3 for groups defined at follow-up 2. The table reports incidence rates, differences, and non-inferiority test results.

**Table S47: Characteristics of resilient and vulnerable groups at baseline after propensity-score matching**

| **Characteristic** | **Overall, N = 30,386** | **Vulnerable group,**  **N = 15,193** | **Resilient group，**  **N = 15,193** | **p-value** |
| --- | --- | --- | --- | --- |
| Sex | —— | —— | —— | >0.9 |
| Female | 17,592 (58%) | 8,797 (58%) | 8,795 (58%) | —— |
| Male | 12,794 (42%) | 6,396 (42%) | 6,398 (42%) | —— |
| Age | 57 (50, 62) | 56 (50, 62) | 57 (50, 62) | 0.8 |
| Ethnic | —— | —— | —— | >0.9 |
| 1_White | 29,149 (96%) | 14,570 (96%) | 14,579 (96%) | —— |
| 2_Asian | 536 (1.8%) | 269 (1.8%) | 267 (1.8%) | —— |
| 3_Black | 314 (1.0%) | 161 (1.1%) | 153 (1.0%) | —— |
| 4_Other | 387 (1.3%) | 193 (1.3%) | 194 (1.3%) | —— |
| Education | 19.0 (13.0, 20.0) | 19.0 (13.0, 20.0) | 19.0 (13.0, 20.0) | 0.12 |
| BMI | 26.2 (23.6, 29.1) | 26.2 (23.6, 29.1) | 26.2 (23.7, 29.1) | 0.5 |
| HH_Income_BL | 3.00 (2.00, 4.00) | 3.00 (2.00, 4.00) | 3.00 (2.00, 4.00) | 0.6 |
| HH_Num_Vehicle_BL | 3.00 (2.00, 3.00) | 3.00 (2.00, 3.00) | 3.00 (2.00, 3.00) | >0.9 |
| IMD | -0.40 (-0.75, 0.18) | -0.41 (-0.75, 0.18) | -0.39 (-0.74, 0.18) | 0.3 |
| Financial_Difficulties_BL | —— | —— | —— | 0.8 |
| 0 | 27,367 (90%) | 13,676 (90%) | 13,691 (90%) | —— |
| 1 | 3,019 (9.9%) | 1,517 (10.0%) | 1,502 (9.9%) | —— |
| Frailty_BL | 0.00 (0.00, 1.00) | 0.00 (0.00, 1.00) | 0.00 (0.00, 1.00) | 0.5 |

This table presents characteristics of resilient and vulnerable groups at baseline, including household income, number of vehicles, IMD, financial difficulties, frailty and covariates, after propensity score matching. Matching was performed at a 1:1 ratio using the nearest neighbor method with a generalized linear model (GLM) for distance calculation and a caliper of 0. 001. Results compare group characteristics to assess the effect of propensity-score matching, as detailed in the table. Continuous variables are reported as mean (standard deviation, SD), and categorical variables are reported as number (percentage, %). Statistical comparisons across groups were performed using the Wilcoxon rank sum test for continuous variables and Pearson’s Chi-squared test for categorical variables.

## **Appendix D. Refferences**

1. Goodman, R., Ford, T., Richards, H., Gatward, R. & Meltzer, H. The Development and Well-Being Assessment: Description and Initial Validation of an Integrated Assessment of Child and Adolescent Psychopathology. *Journal of Child Psychology and Psychiatry* **41**, 645–655 (2000).

2. Smith, B. W. *et al.* The brief resilience scale: Assessing the ability to bounce back. *Int. J. Behav. Med.* **15**, 194–200 (2008).

3. Zhang, Y.-R. *et al.* Personality traits and brain health: a large prospective cohort study. *Nat. Mental Health* **1**, 722–735 (2023).

4. Dahlén, A. D., Miguet, M., Schiöth, H. B. & Rukh, G. The influence of personality on the risk of myocardial infarction in UK Biobank cohort. *Sci Rep* **12**, 6706 (2022).

5. Wik, L. *et al.* Proximity Extension Assay in Combination with Next-Generation Sequencing for High-throughput Proteome-wide Analysis. *Molecular & Cellular Proteomics* **20**, (2021).

6. Deng, Y.-T. Atlas of the plasma proteome in health and disease in 53,026 adults. *OPEN ACCESS*.

7. Li, Y. *et al.* The brain structure and genetic mechanisms underlying the nonlinear association between sleep duration, cognition and mental health. *Nat Aging* **2**, 425–437 (2022).

8. Sun, B. B. *et al.* Plasma proteomic associations with genetics and health in the UK Biobank. *Nature* **622**, 329–338 (2023).

9. Diedenhofen, B. & Musch, J. cocor: A Comprehensive Solution for the Statistical Comparison of Correlations. *PLOS ONE* **10**, e0121945 (2015).

10. Ho, D., Imai, K., King, G. & Stuart, E. A. MatchIt: Nonparametric Preprocessing for Parametric Causal Inference. *Journal of Statistical Software* **42**, 1–28 (2011).

11. Rosseel, Y. lavaan: An R Package for Structural Equation Modeling. *Journal of Statistical Software* **48**, 1–36 (2012).

12. Wu, T. *et al.* clusterProfiler 4.0: A universal enrichment tool for interpreting omics data. *Innovation* **2**, (2021).

13. Yu, G. & He, Q.-Y. ReactomePA: an R/Bioconductor package for reactome pathway analysis and visualization. *Mol. BioSyst.* **12**, 477–479 (2016).

14. Faul, F., Erdfelder, E., Buchner, A. & Lang, A.-G. Statistical power analyses using G*Power 3.1: Tests for correlation and regression analyses. *Behavior Research Methods* **41**, 1149–1160 (2009).
